# Supplementary material for: A three-step relay mechanism enables the highly selective reduction of NO3⁻ to N2 under acidic conditions
Source: Research Square preprint supplement (doi:10.21203/rs.3.rs-7669110/v1), 2025-10-08
Supplement: Supplementary file 1 [file 356e9b2854a074e18df5fa76.docx]

### **Supplemental Information**

A three-step relay mechanism enables the highly selective reduction of NO3⁻ to N2 under acidic conditions

Mingsen Xie,1⊥ Tianyu Zhang,1,2⊥ Jingkun Yu,1⊥ Xiaonan Yang,1 Qi Liu,1 Haiquan Xie,2* Siyu Lu1*

1Pingyuan Laboratory, College of Chemistry, Zhengzhou University, Zhengzhou 450000, China

2College of Chemistry and Pharmaceutical Engineering, Nanyang Normal University, Nanyang 473000, China

**Characterization**


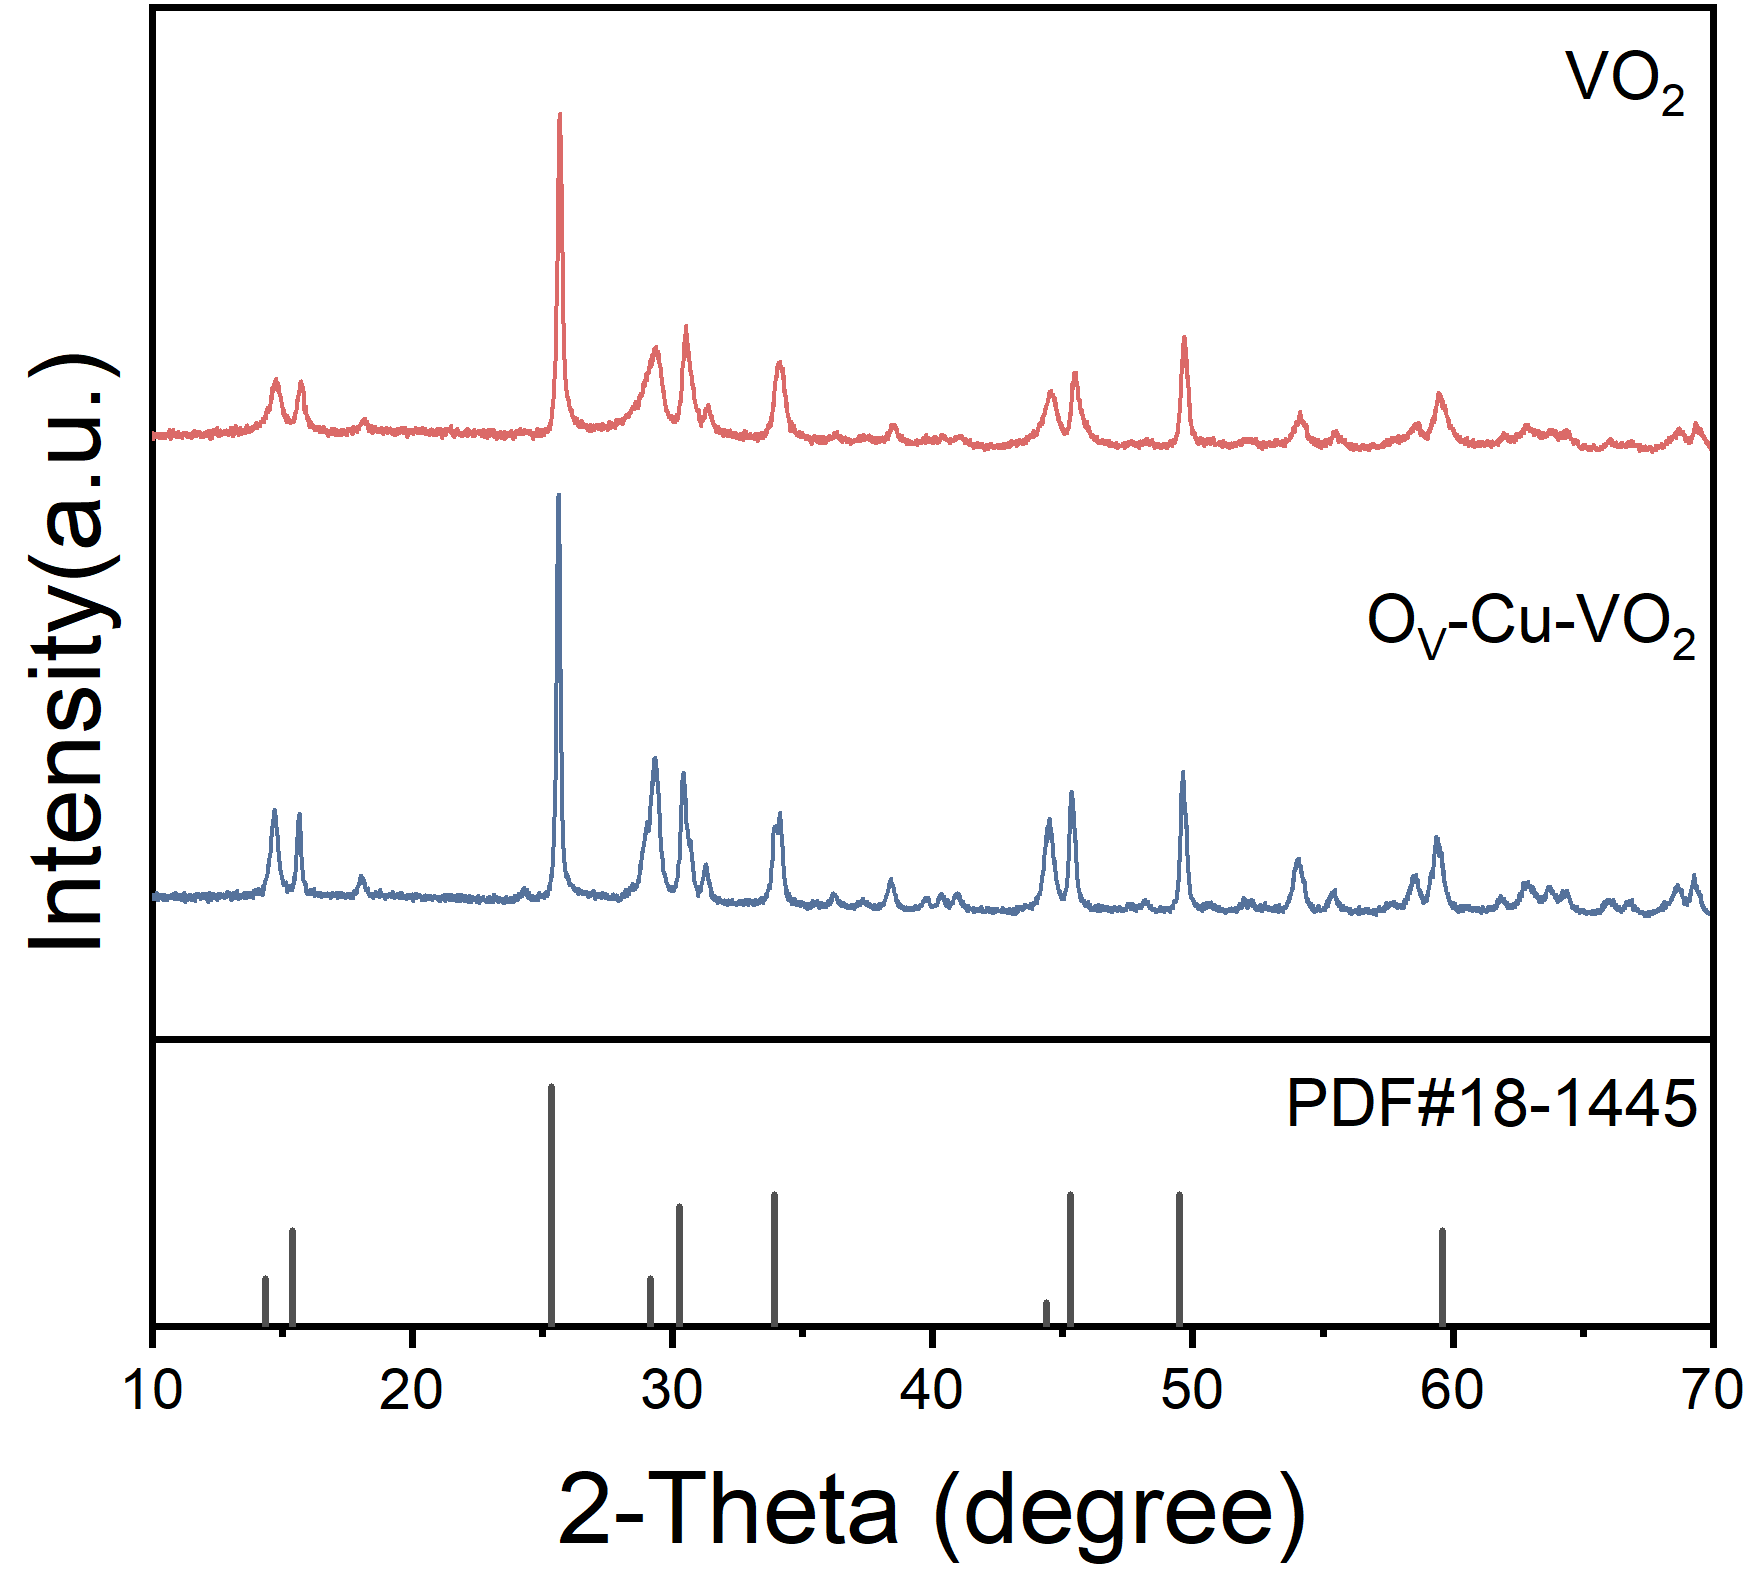


**Figure S1**. XRD of VO2 and OV-Cu-VO2. After doping with Cu, no obvious Cu peak was observed, indicating that Cu might exist in a monatomic form.


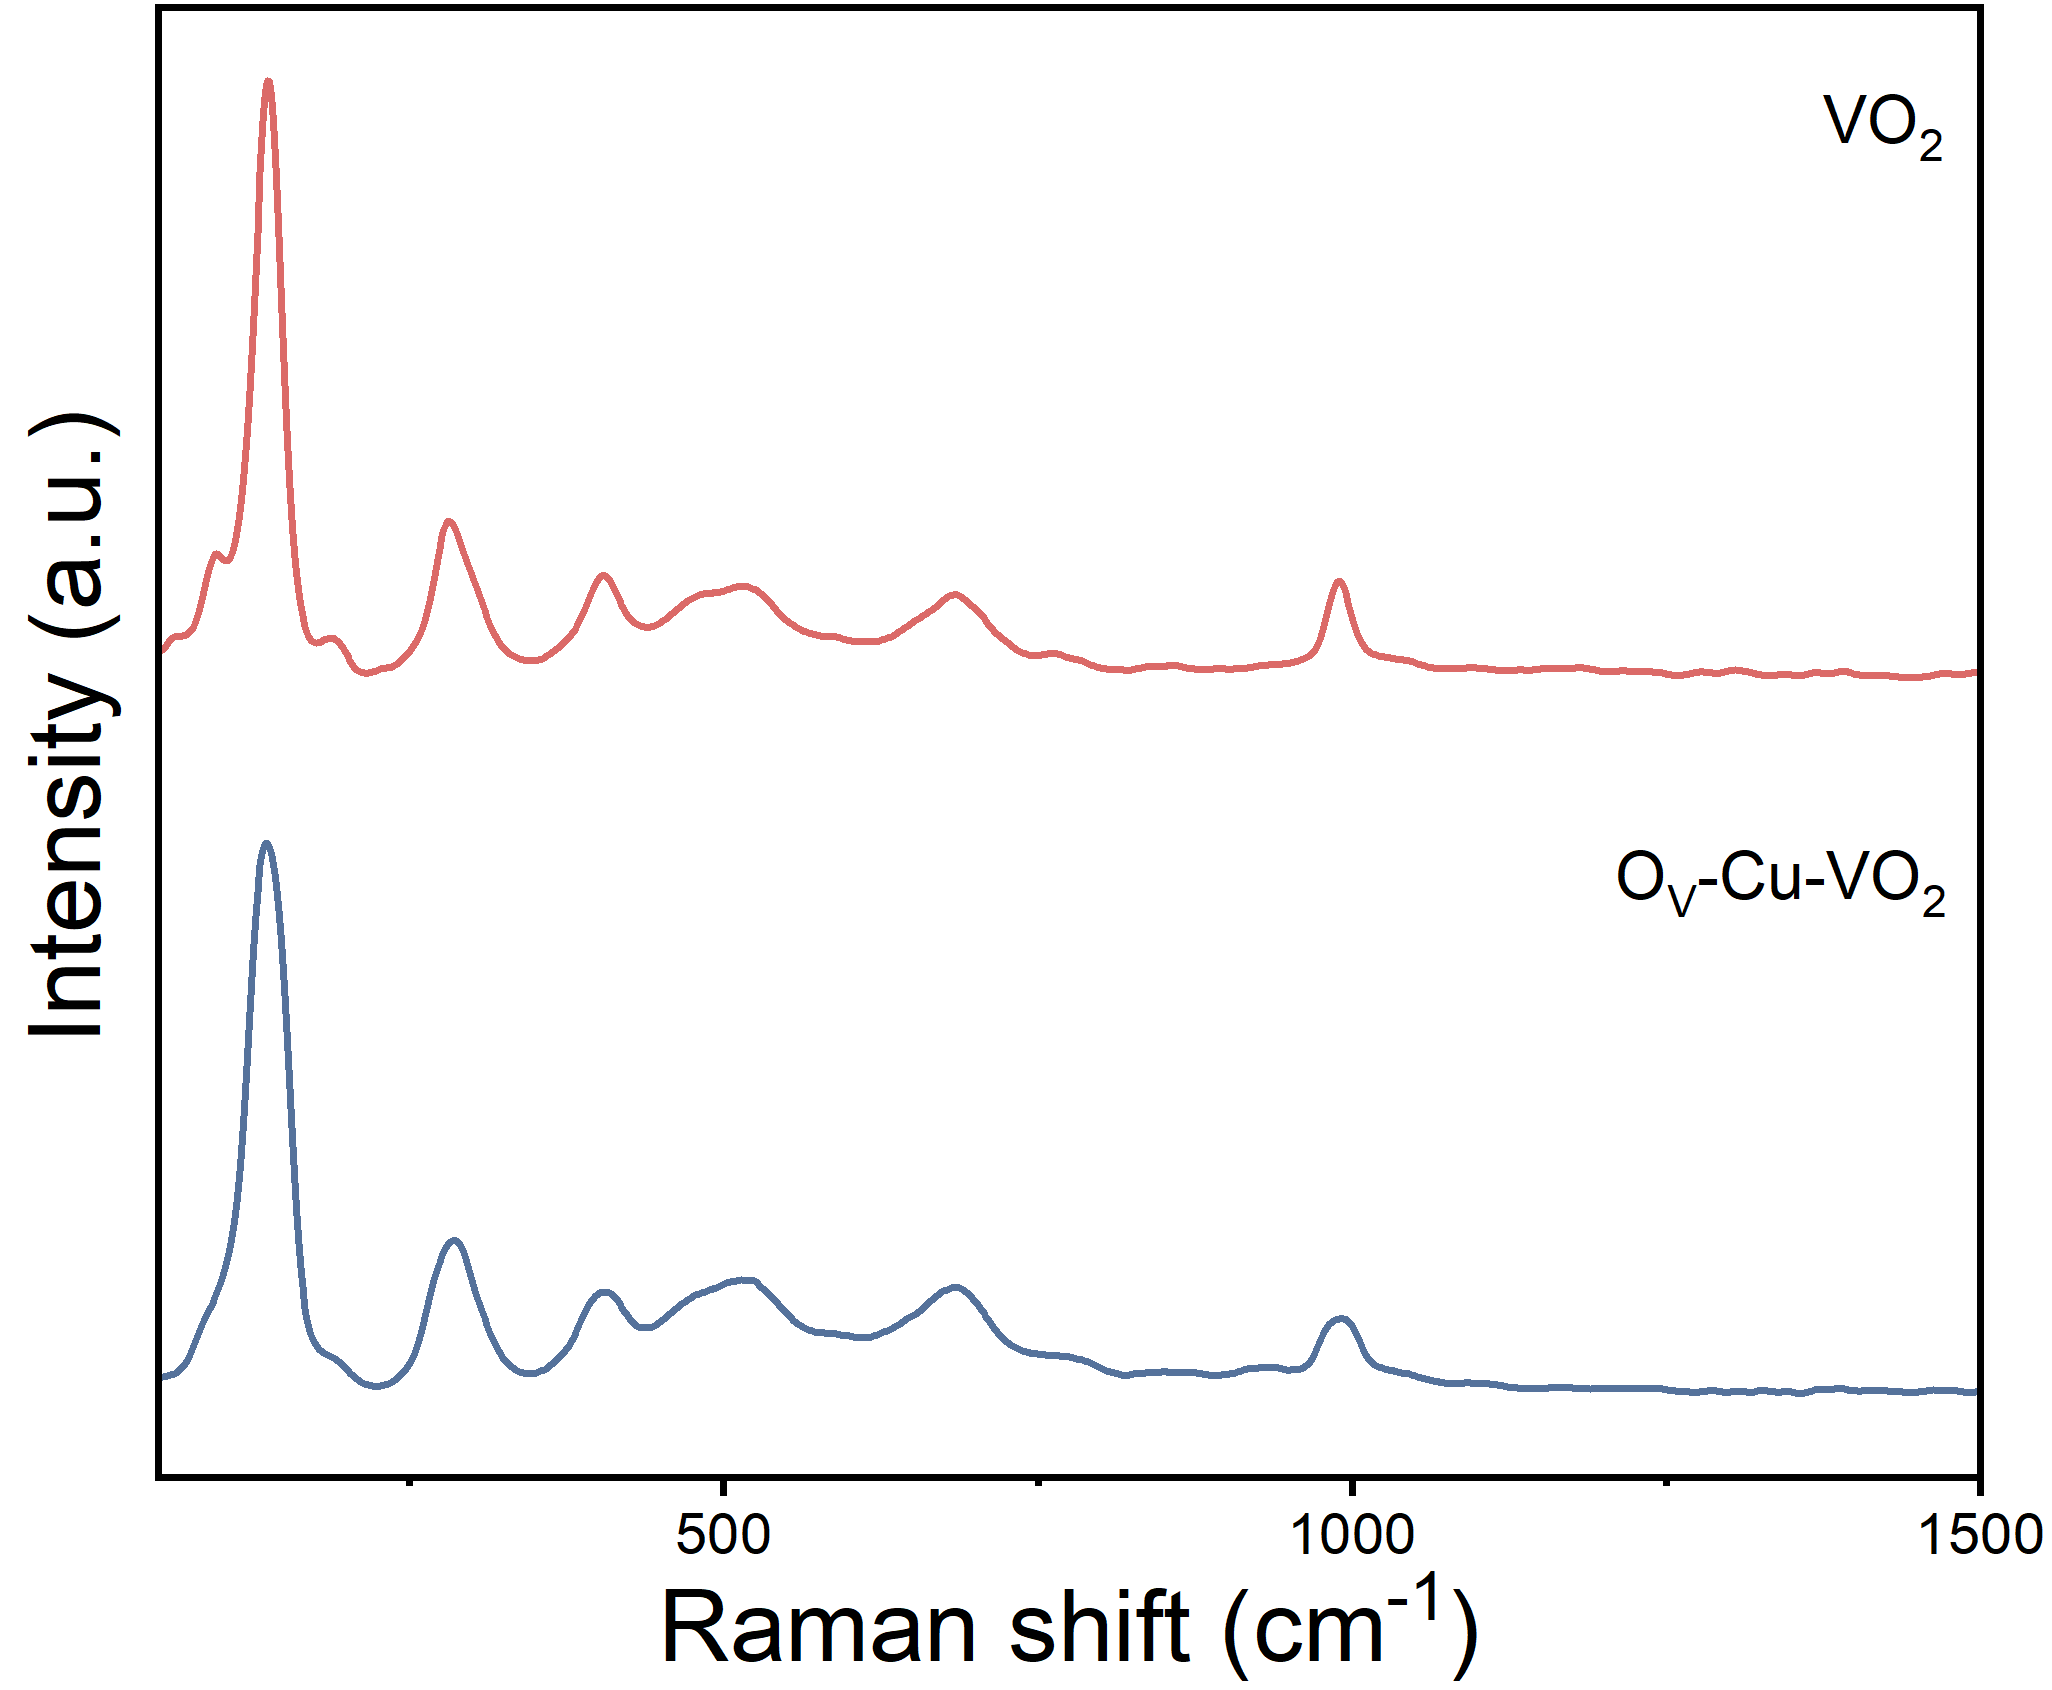


**Figure S2.** Raman comparison of VO2 and OV-Cu-VO2. The crystal structure is intact, indicating that the introduction of Cu has not disrupted the crystal integrity of OV-Cu-VO2.


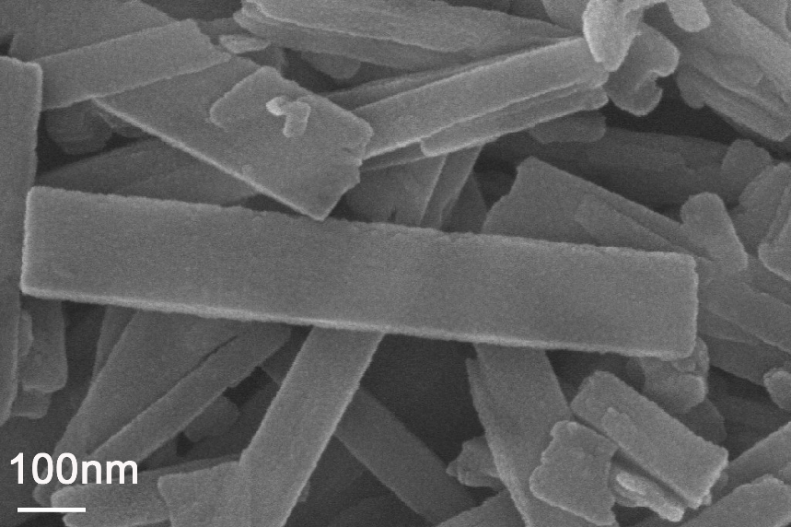


**Figure S3.** SEM image of OV-Cu-VO2.


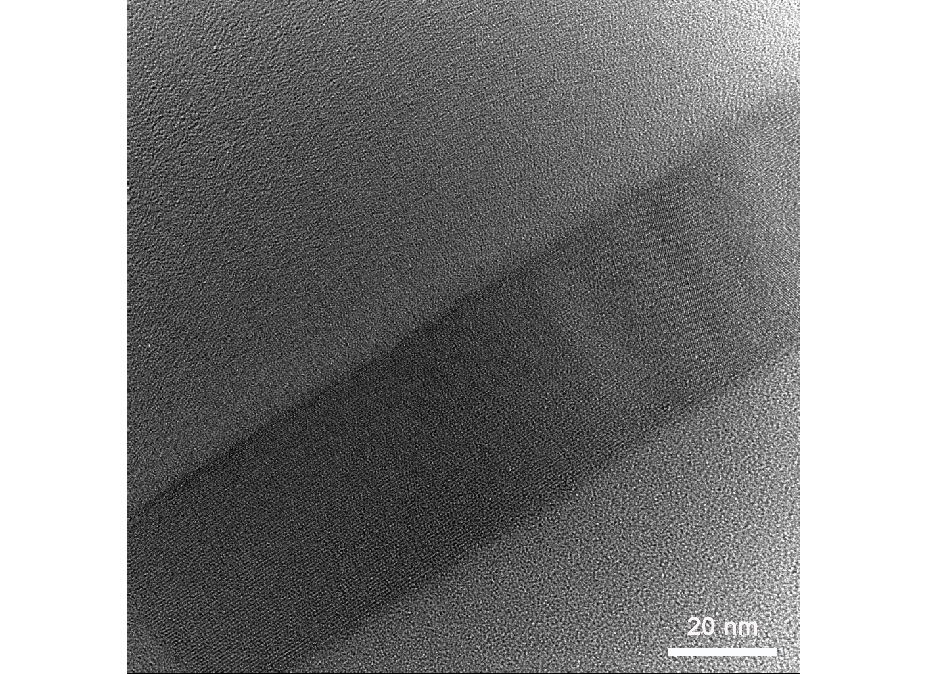


**Figure S4.** TEM image of OV-Cu-VO2.


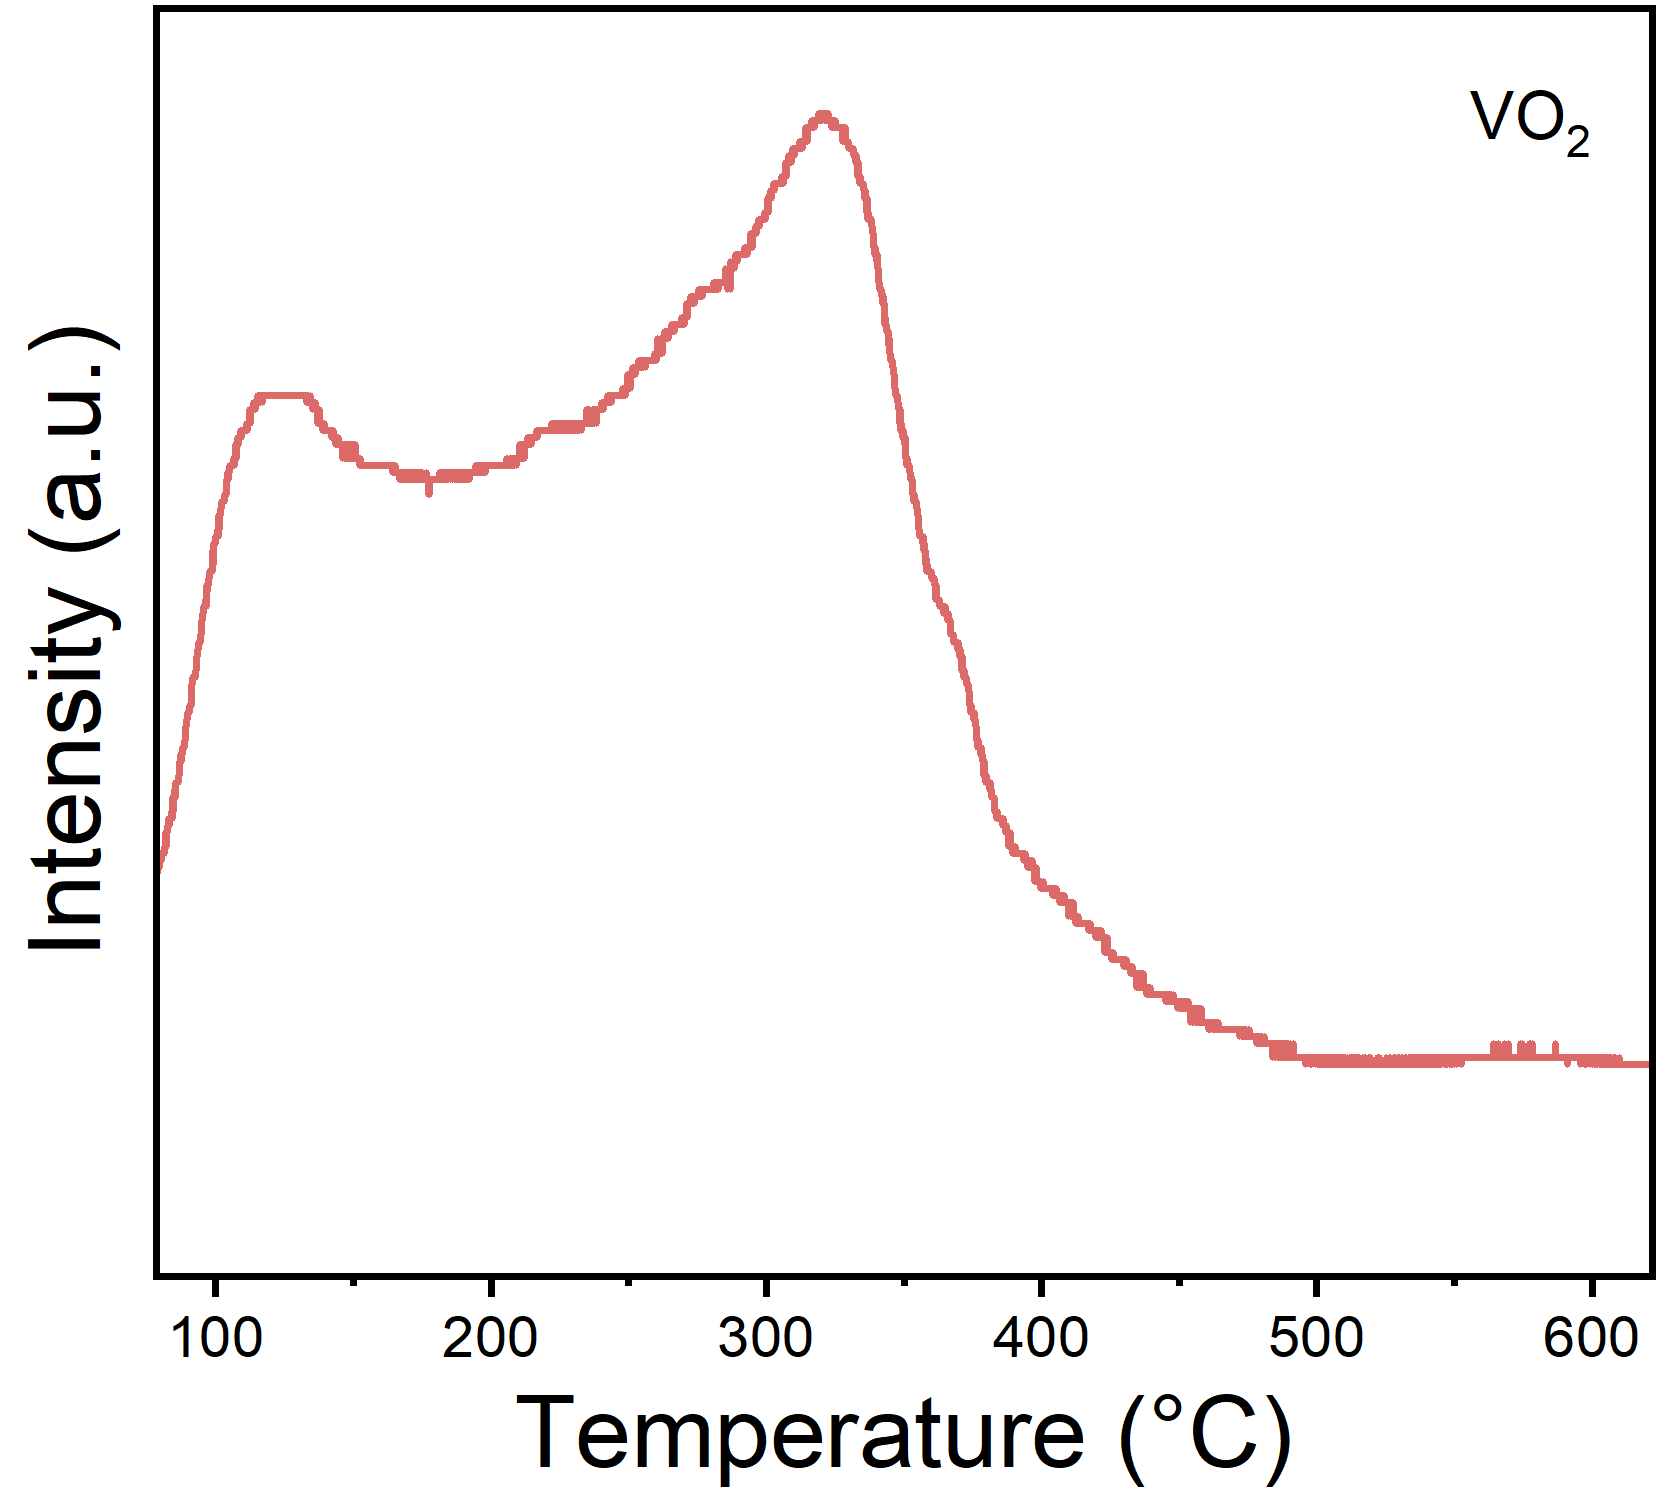


**Figure S5.** NH3-TPD curves for VO2.The content and intensity of representative Lewis acid sites of NH3-TPD at 250-400 °C indicate that VO2 has strong Lewis acidity. This means that there are more NO3− adsorption sites on the material surface, which is more conducive to the activation of NO3−.

**
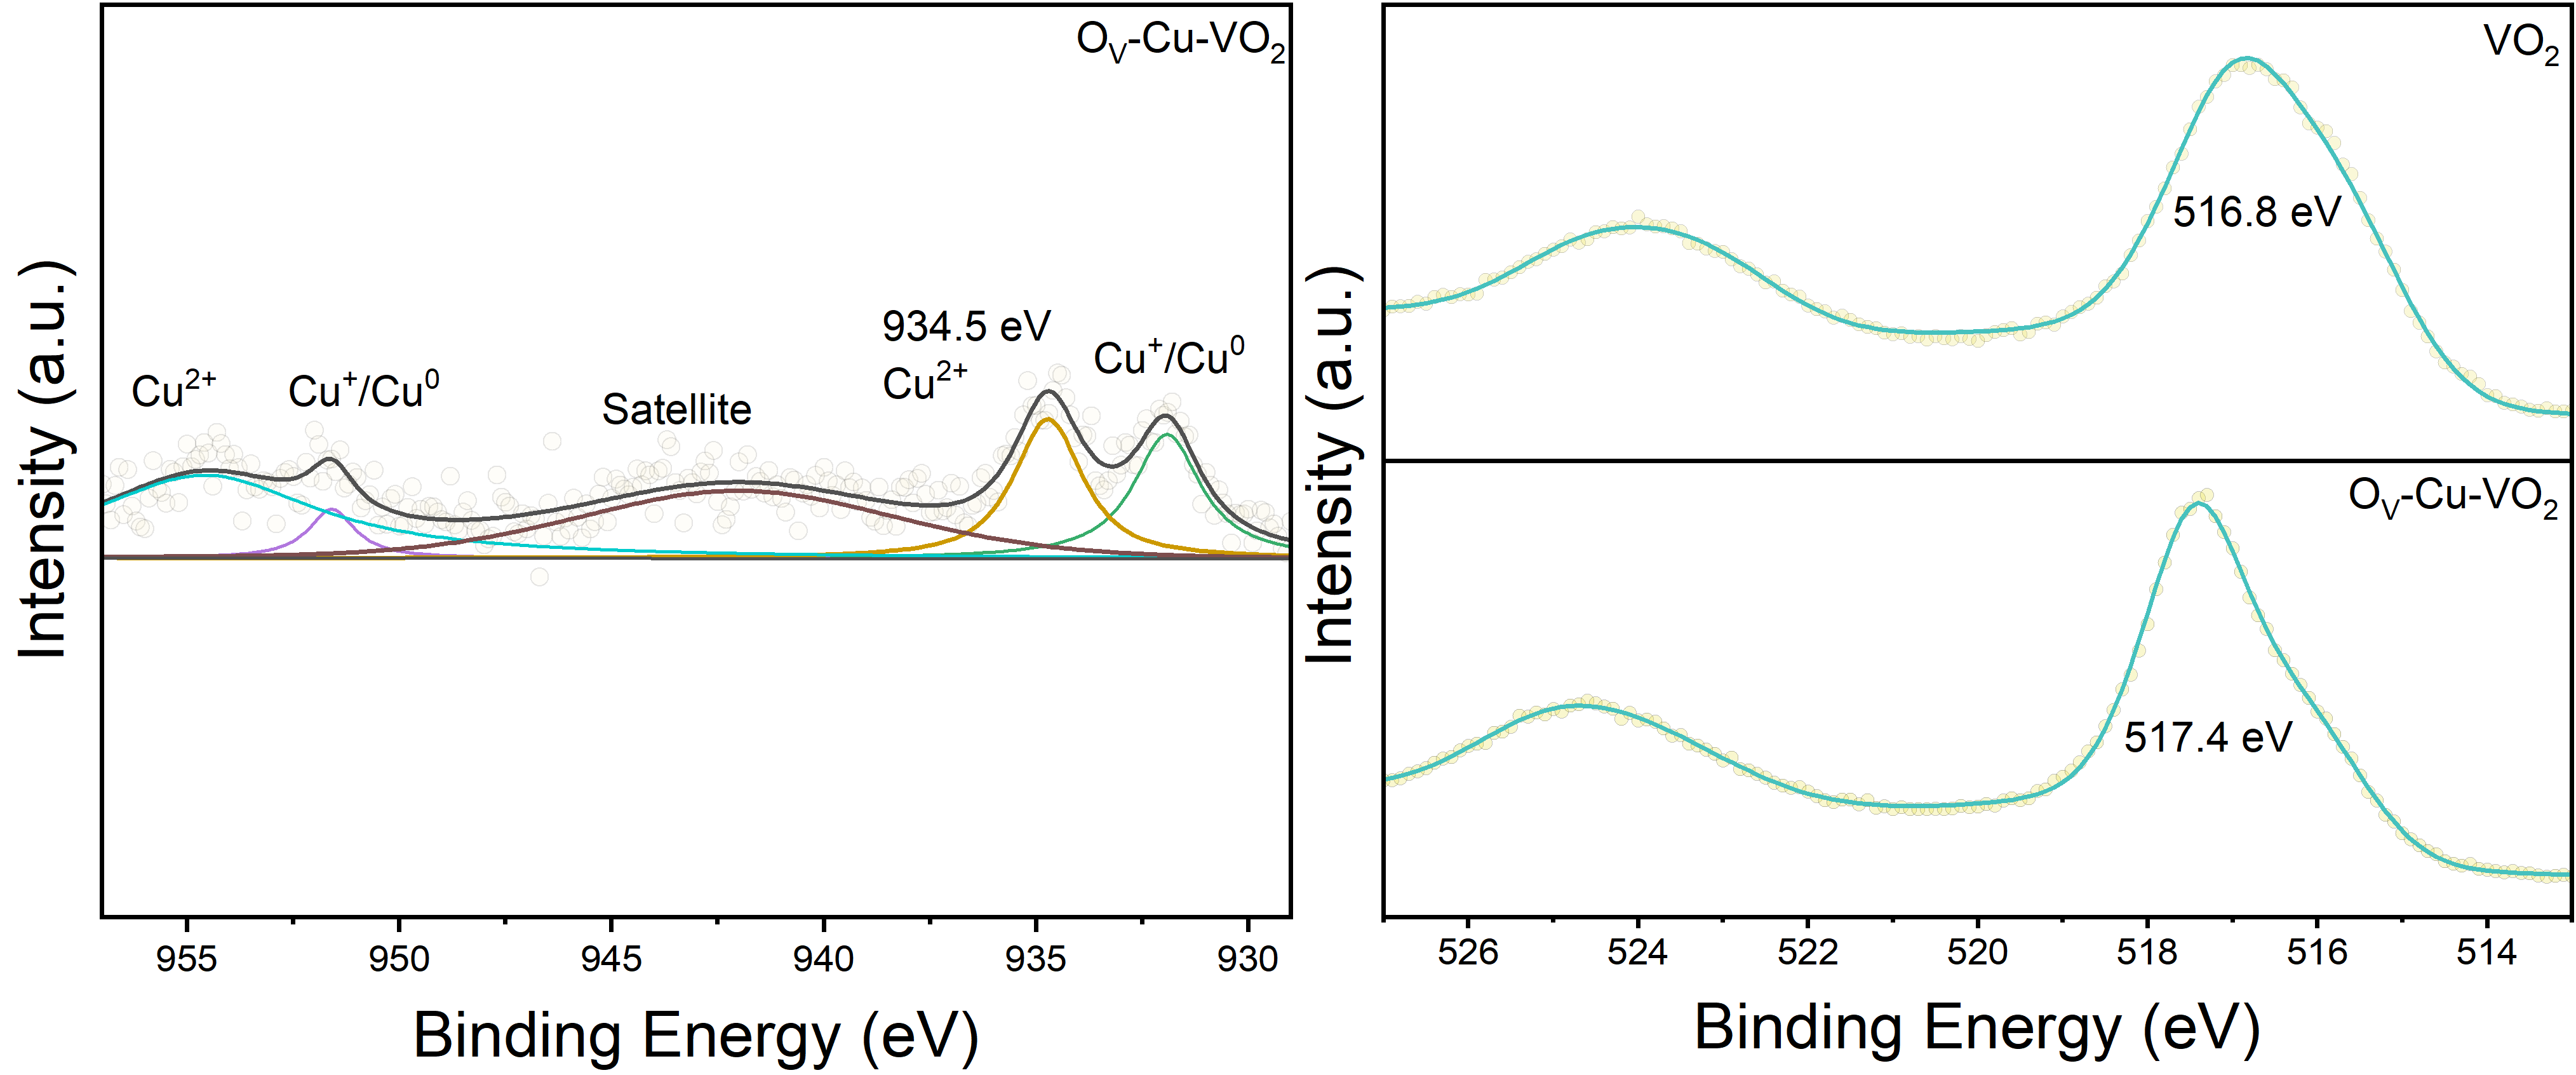
**

**Figure S6.** (a) Cu XPS of OV-Cu-VO2. (b) V XPS of OV-Cu-VO2.There is an electronic perturbation between Cu and V.


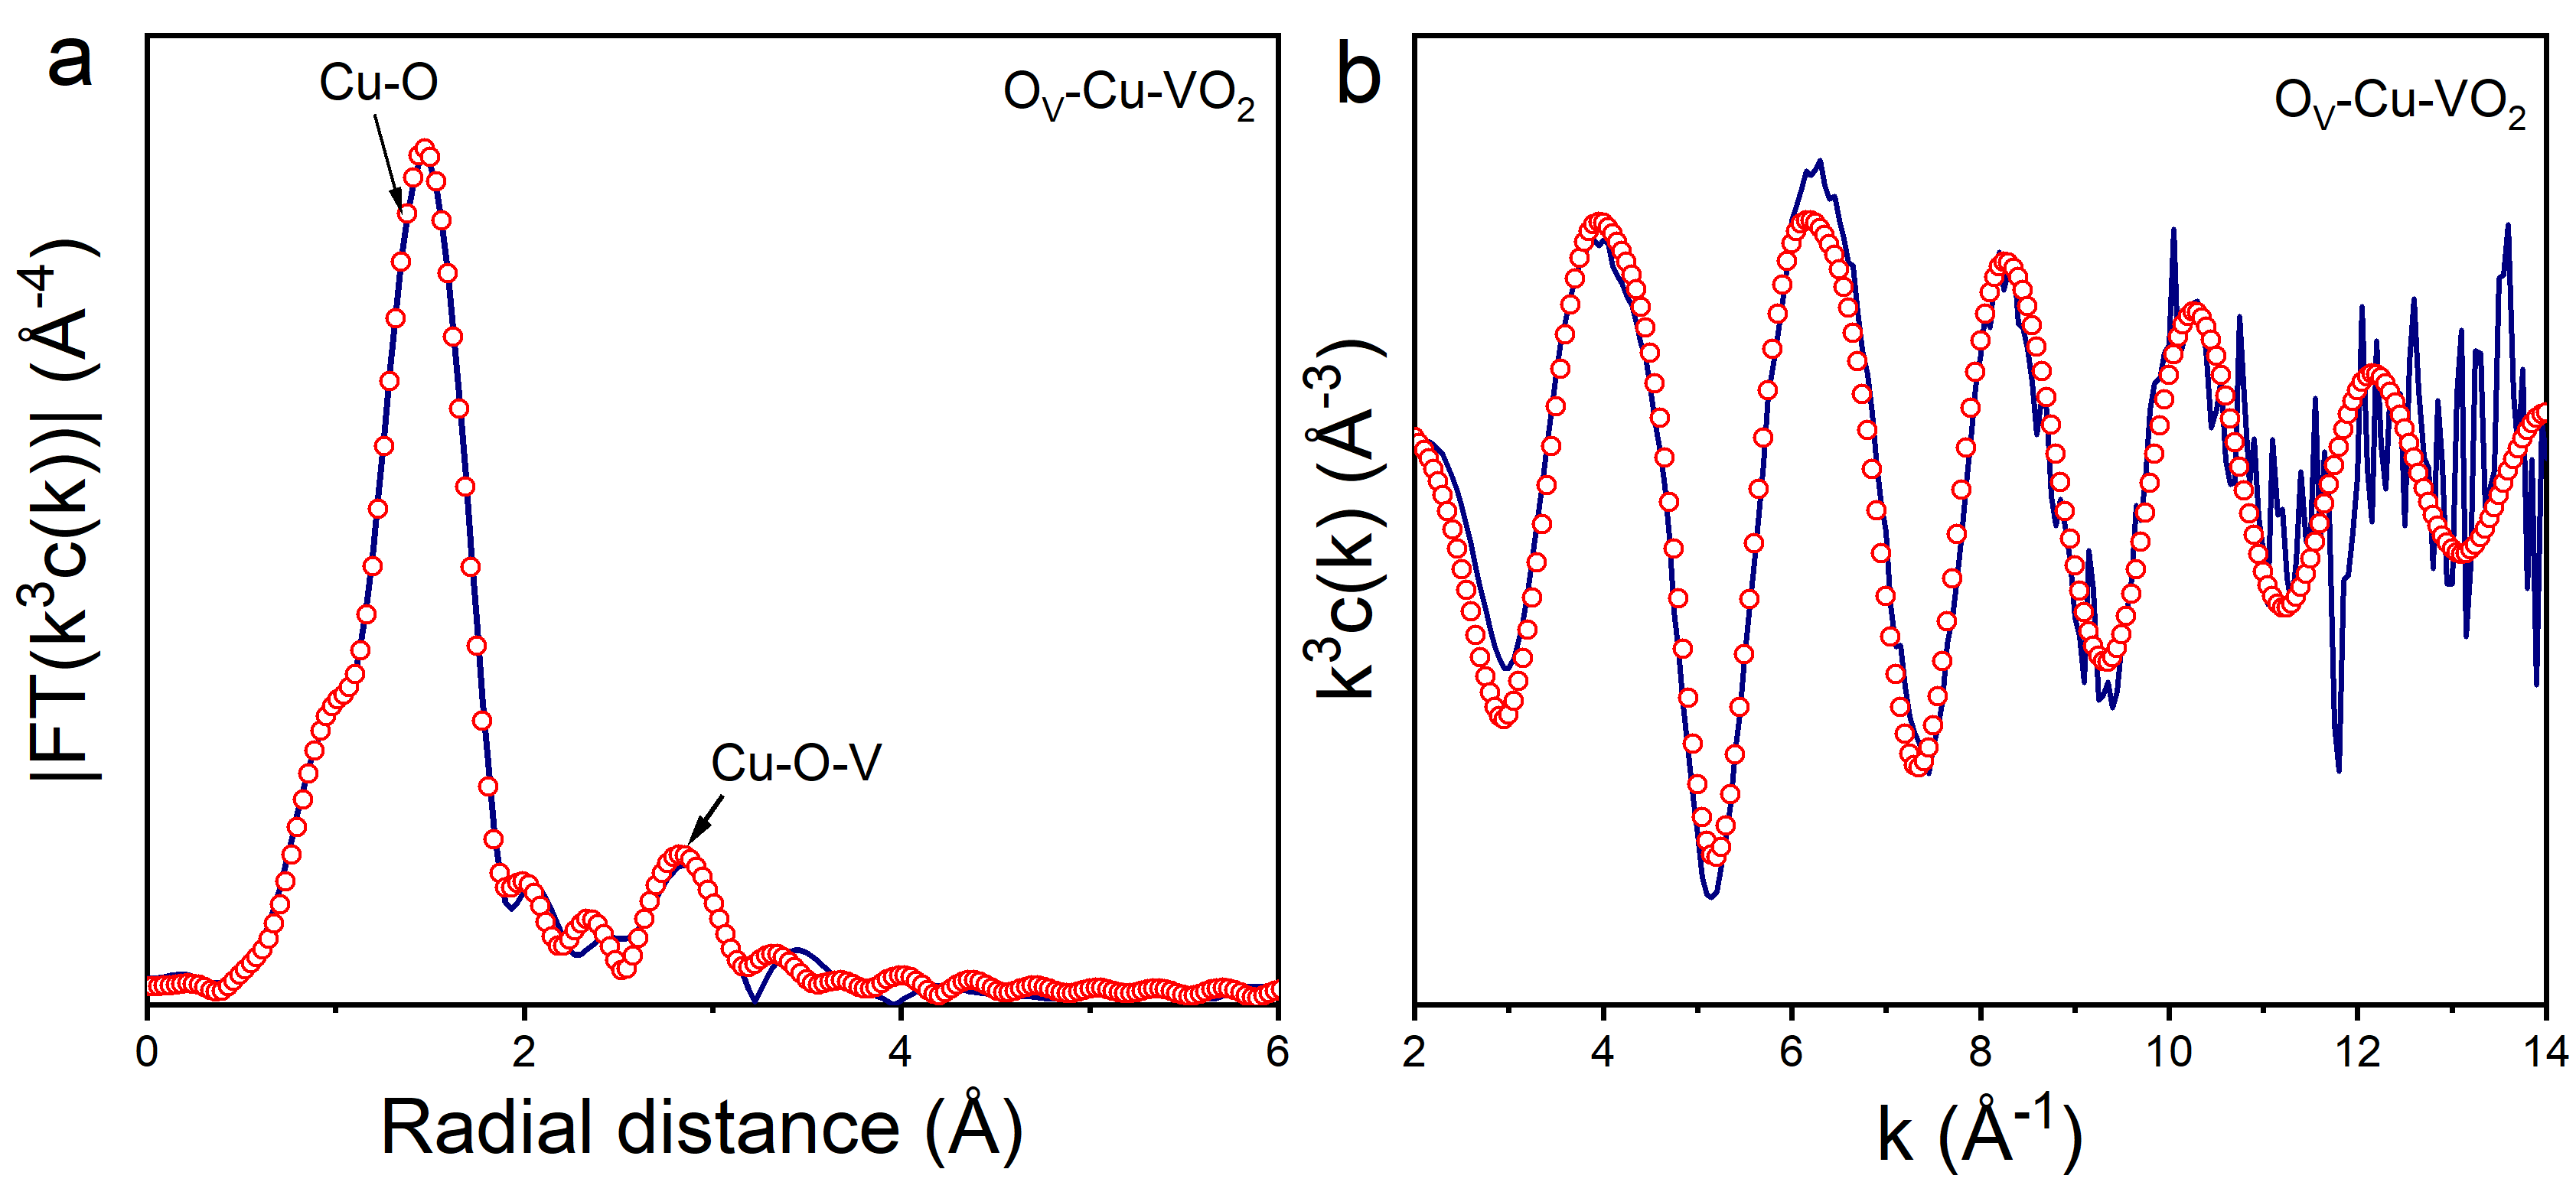


**Figure S7.** XAFS fitting data of R-fit and K-fit for different samples OV-Cu-VO2.


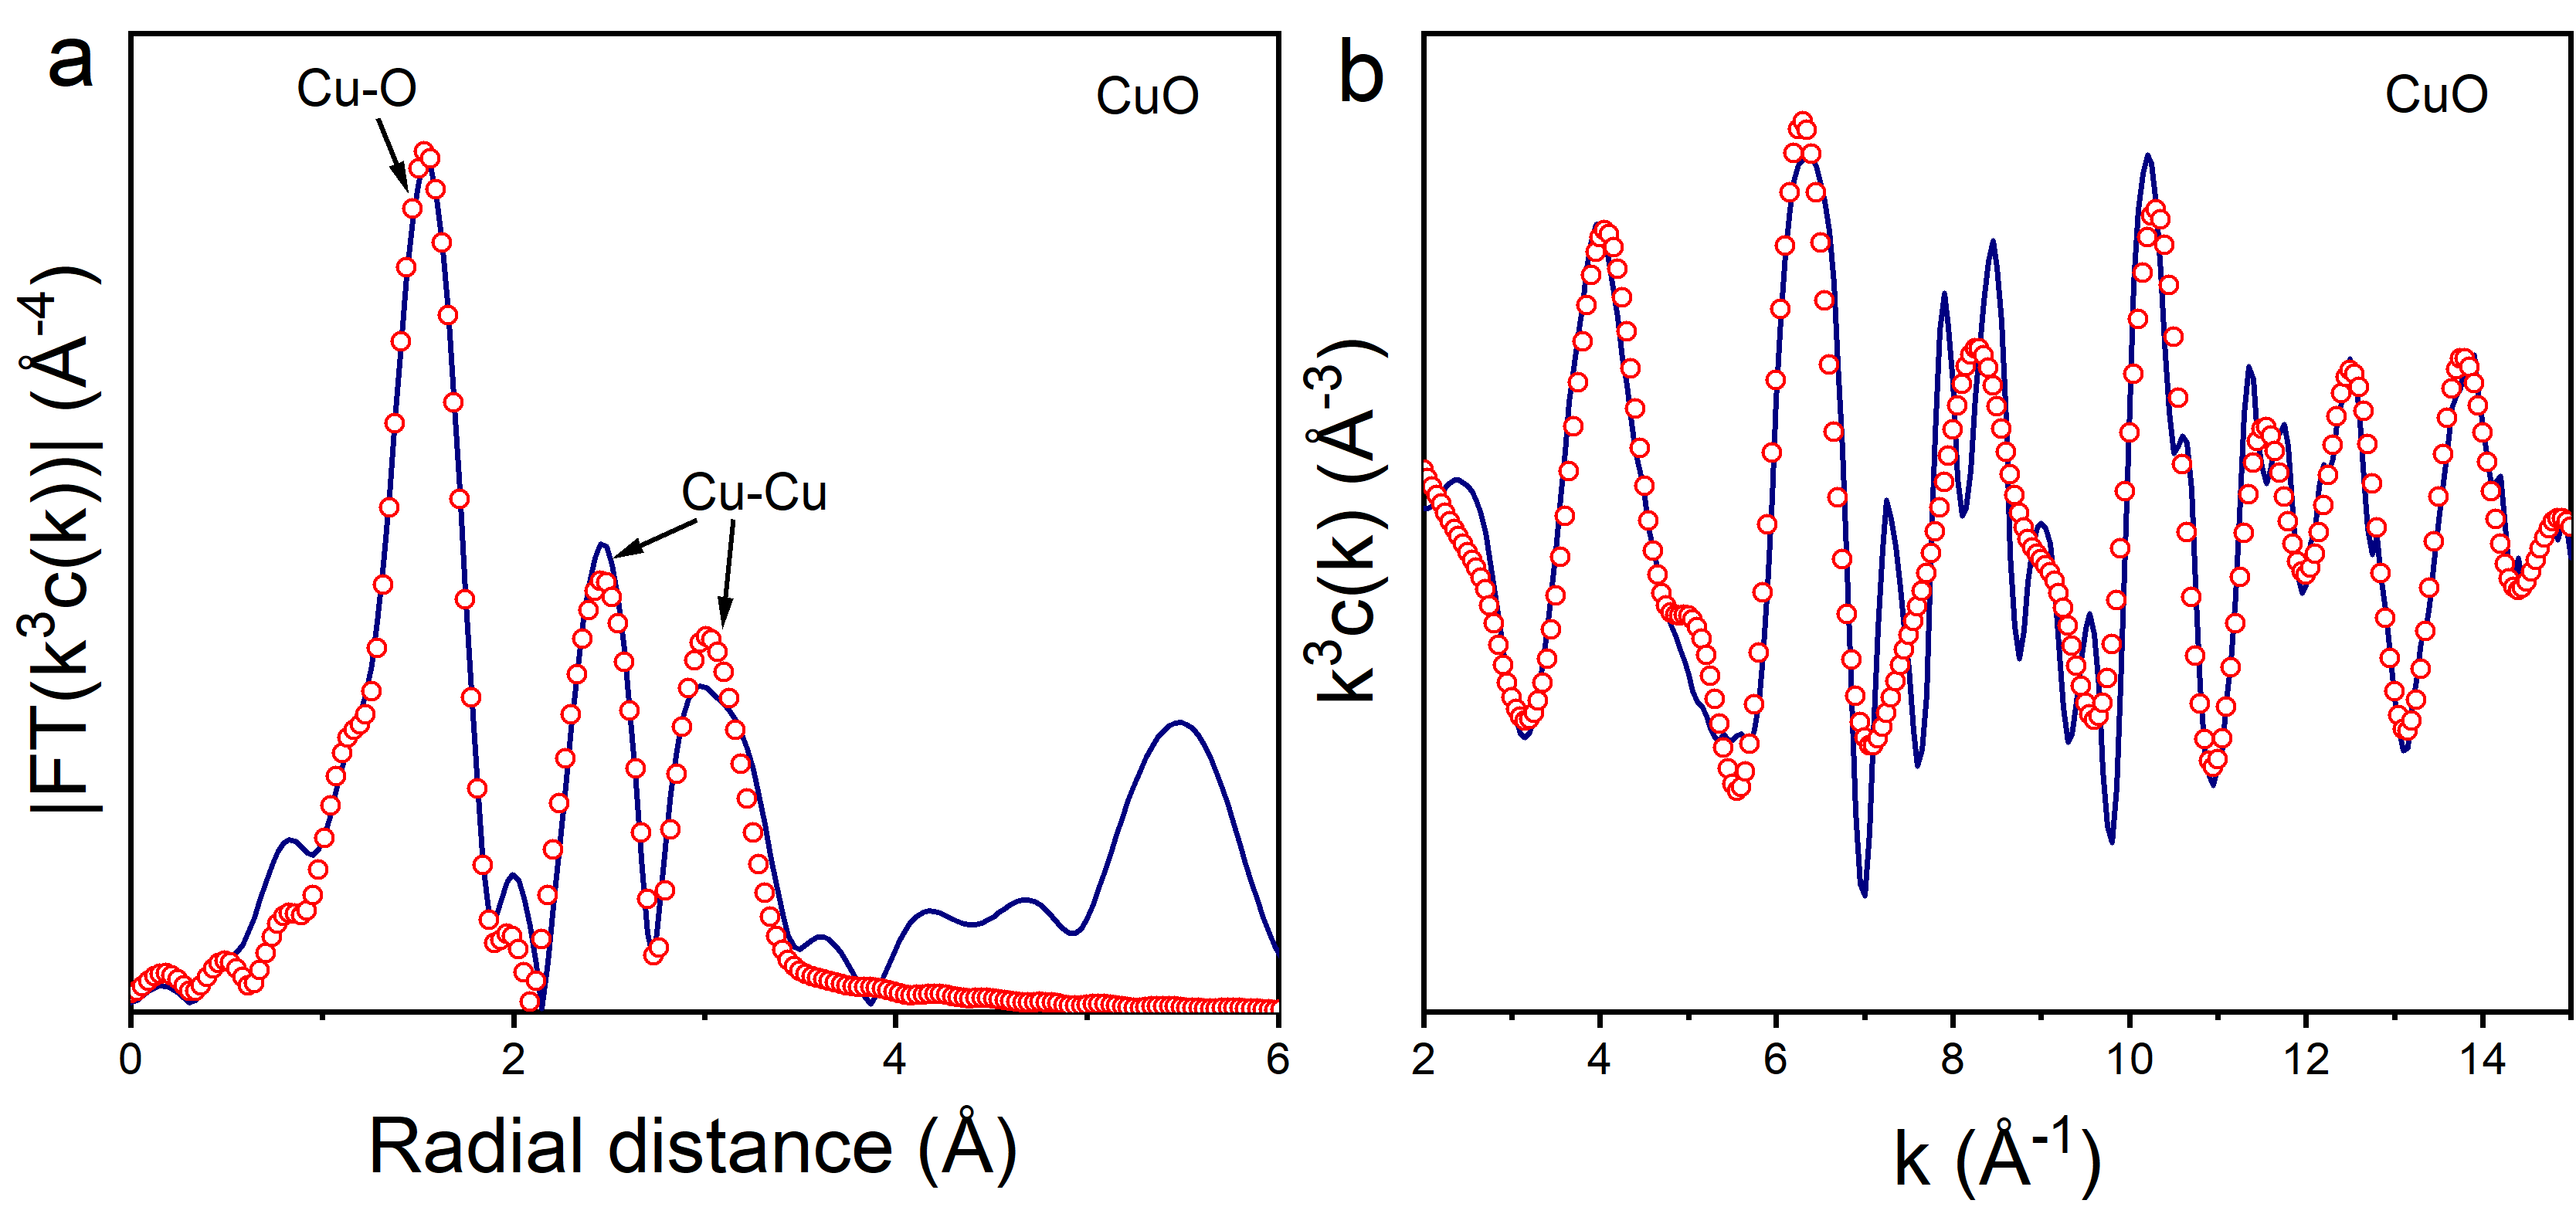


**Figure S8.** XAFS fitting data of R-fit and K-fit for different samples CuO.


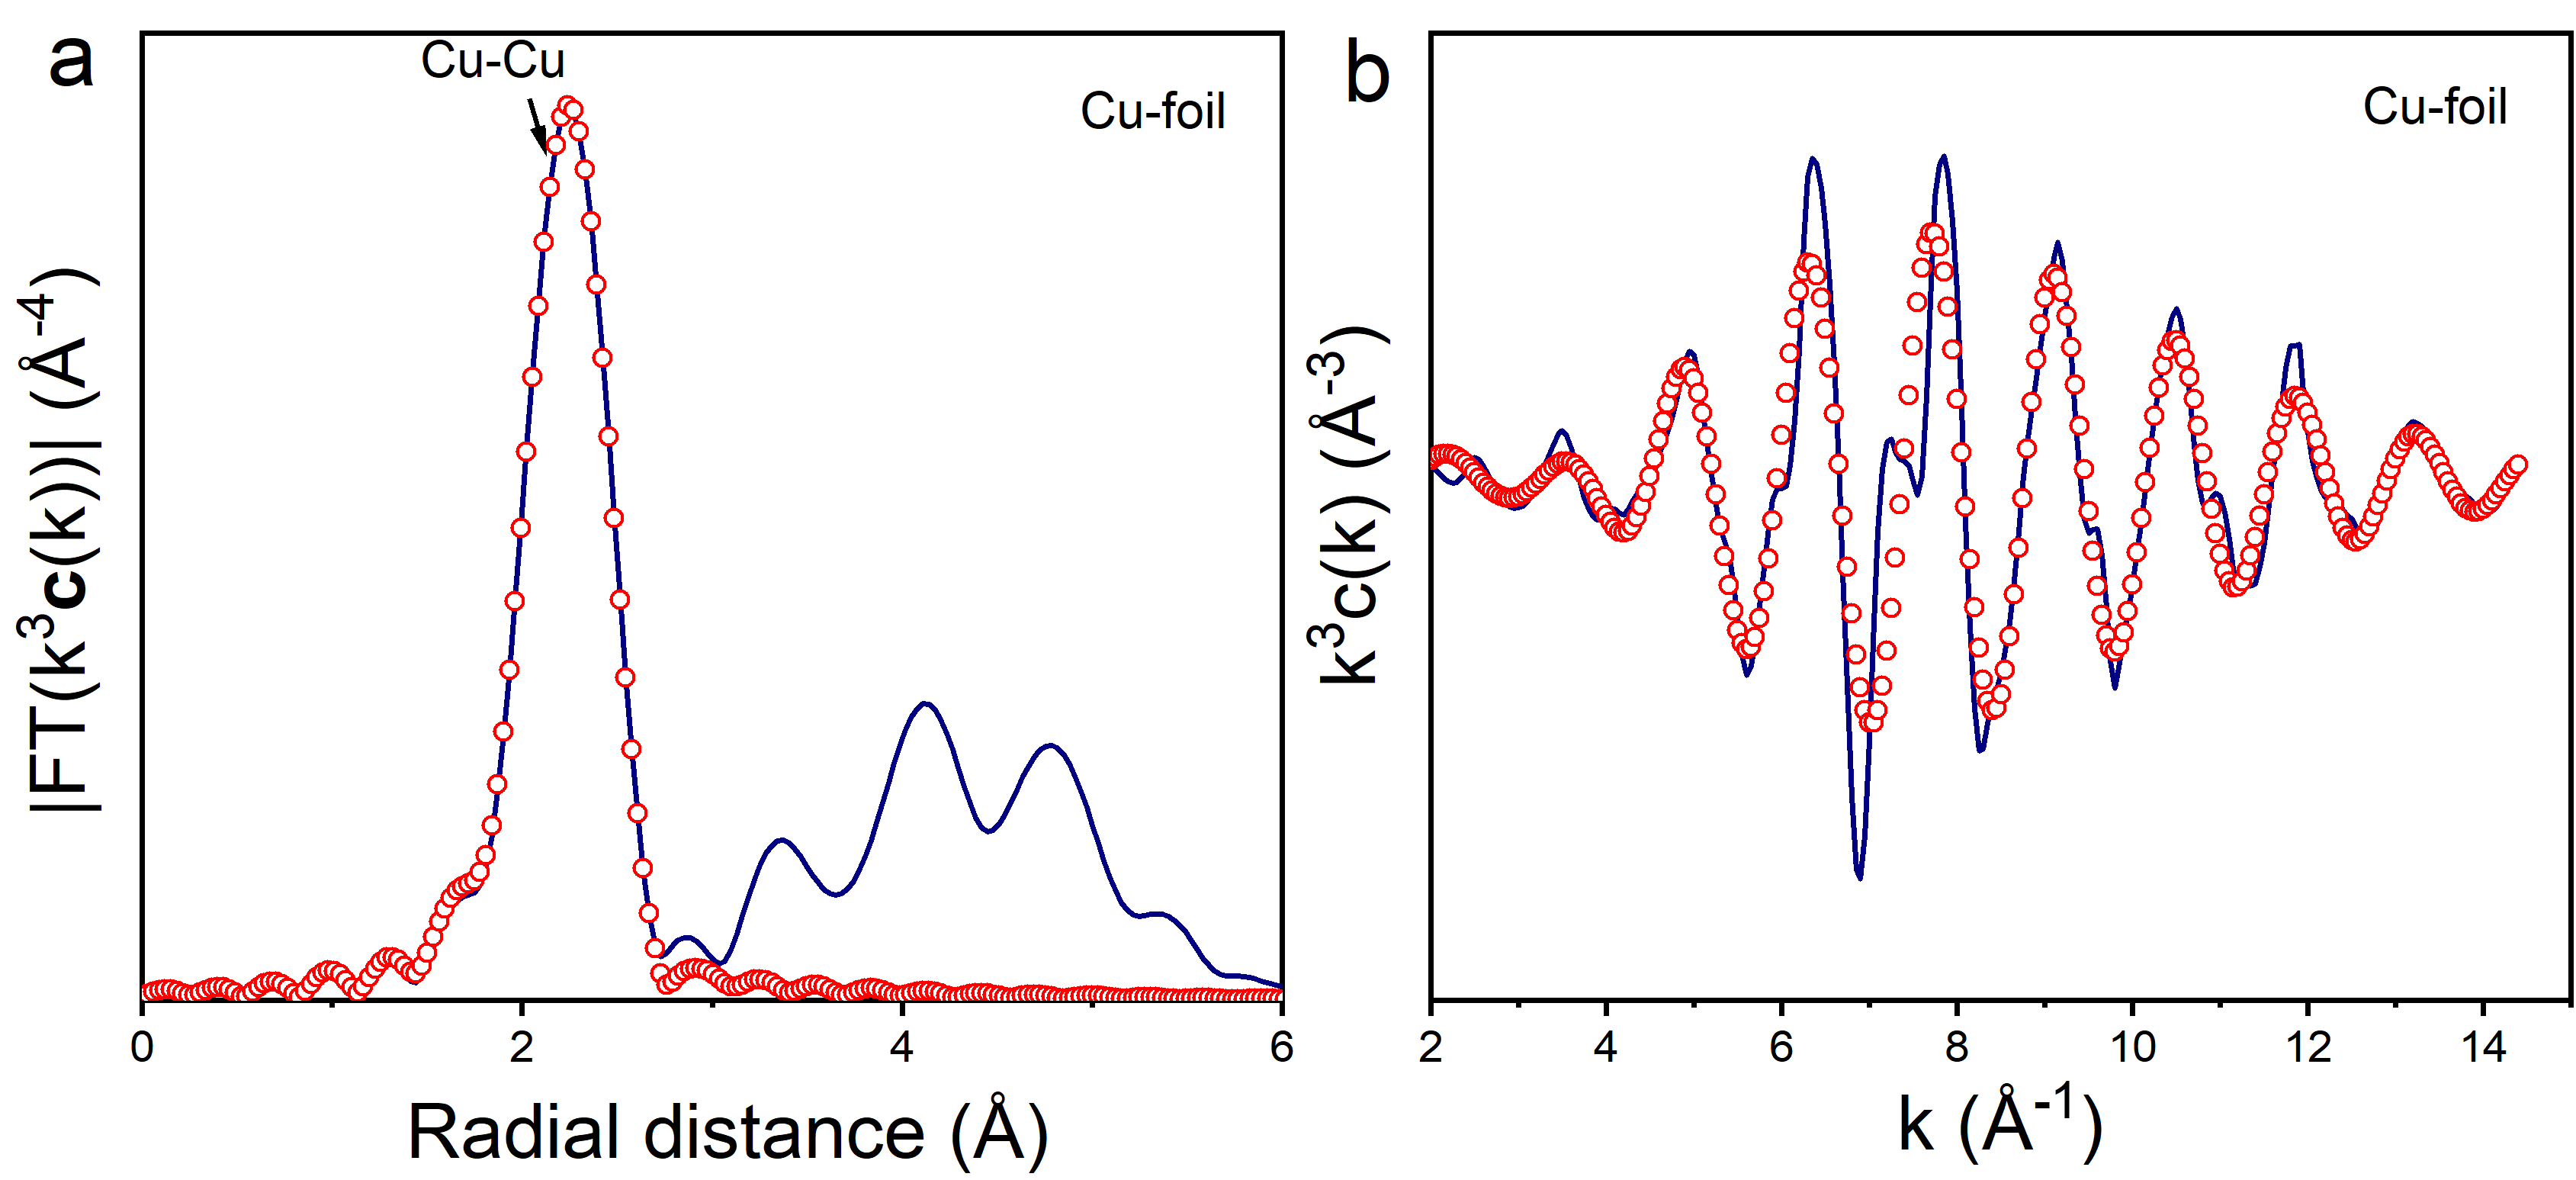


**Figure S9.** XAFS fitting data of R-fit and K-fit for different samples Cu-foil.


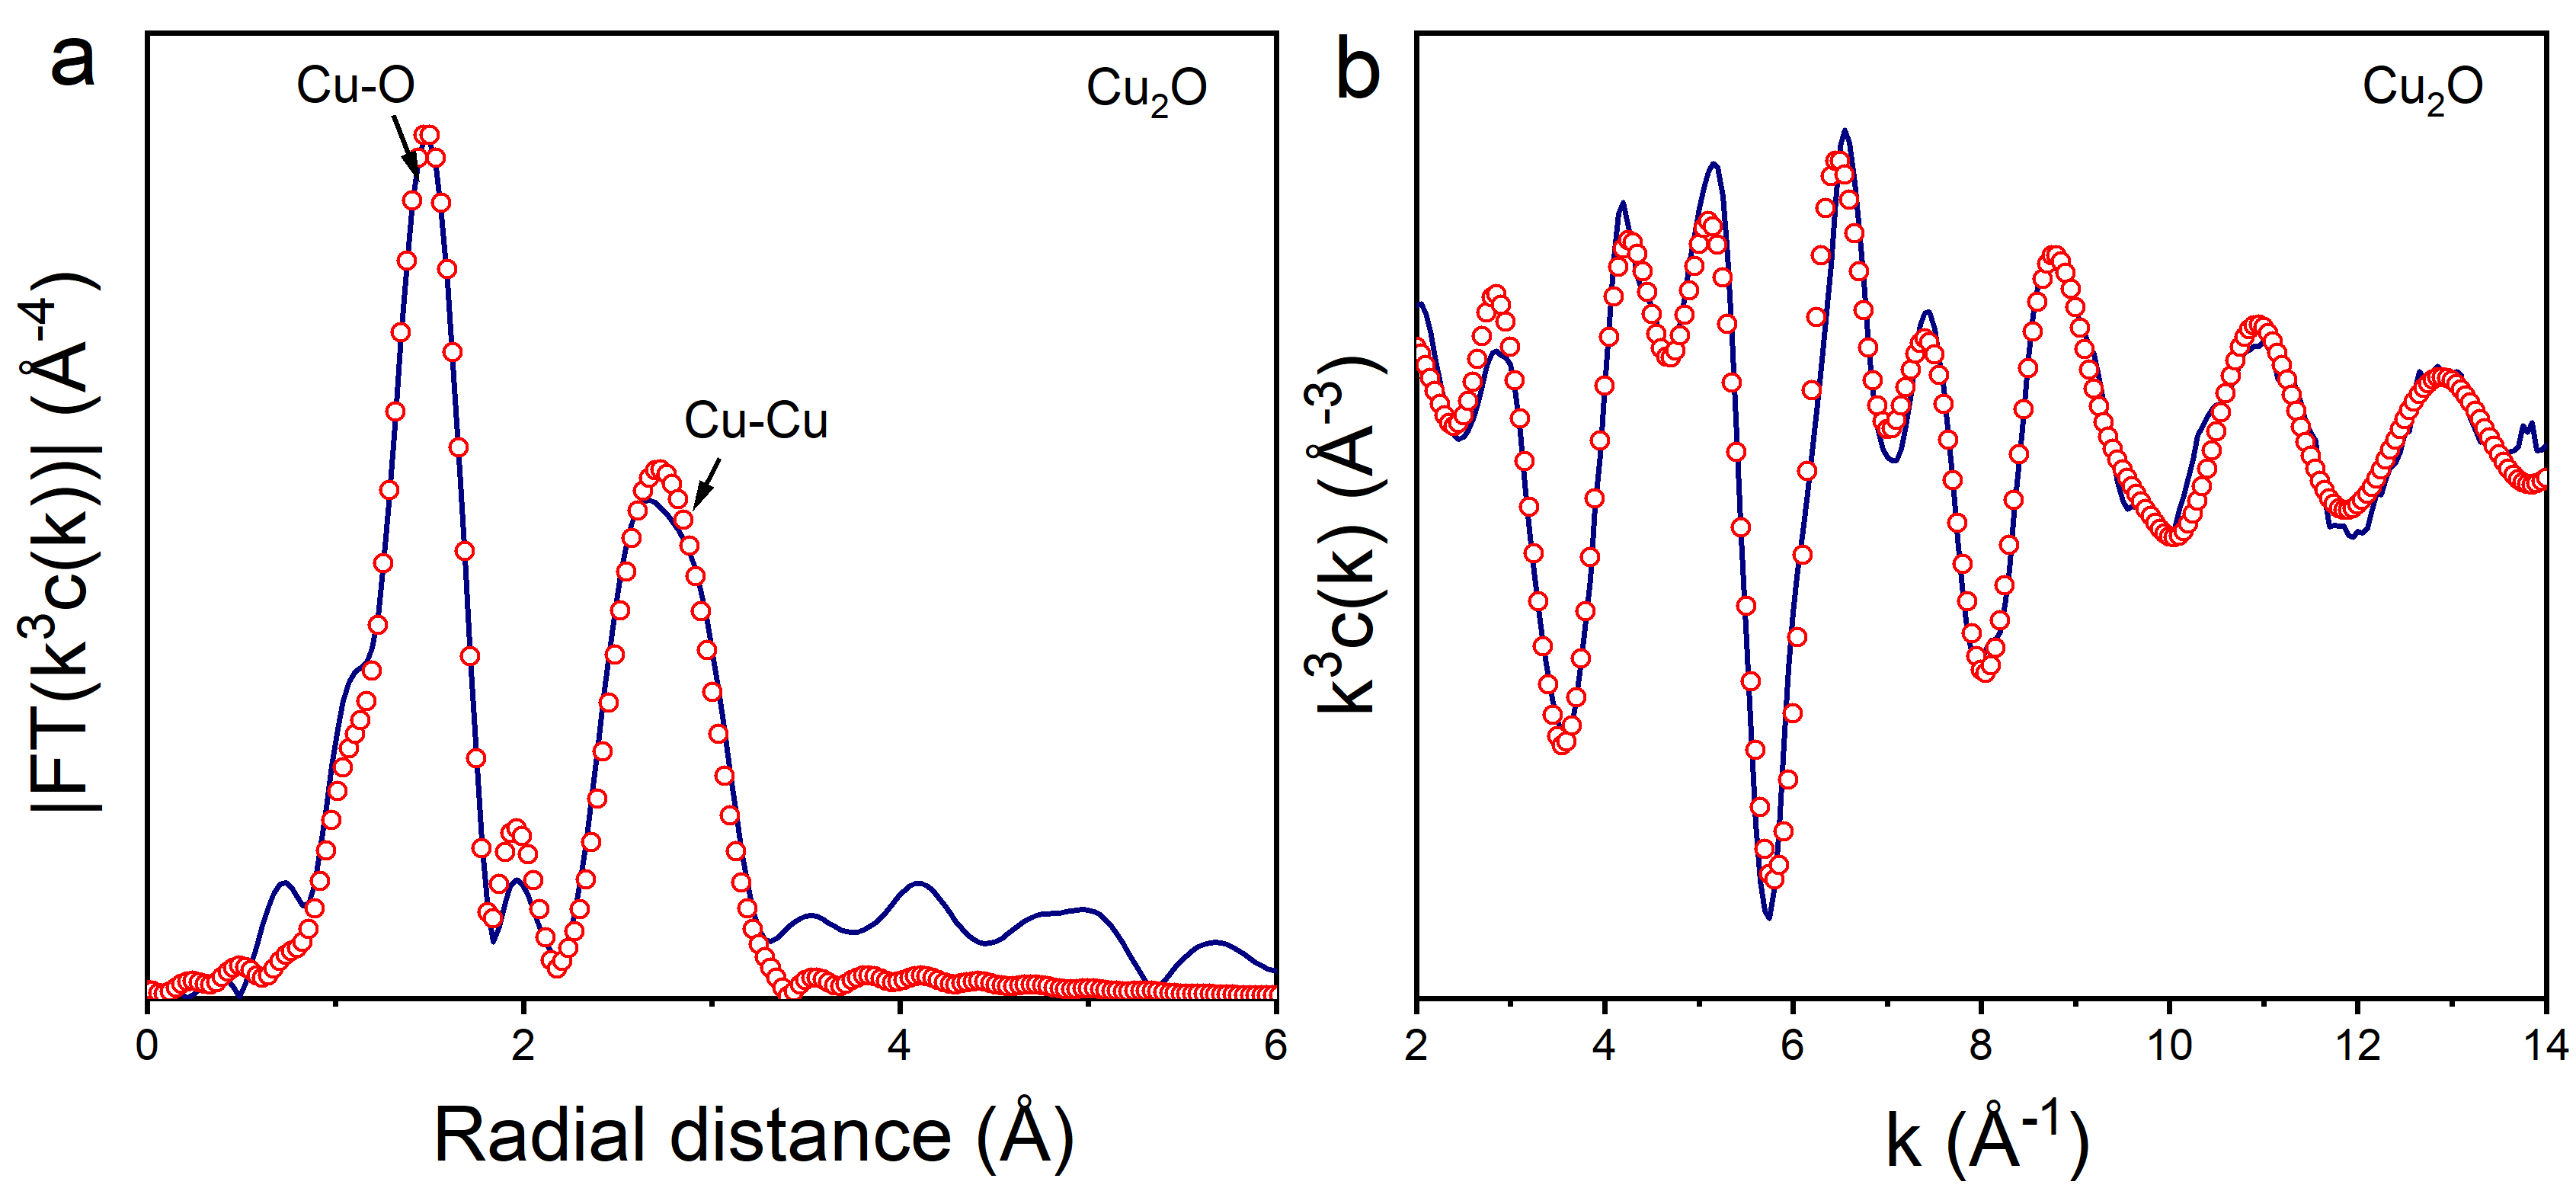


**Figure S10.** XAFS fitting data of R-fit and K-fit for different samples Cu2O.


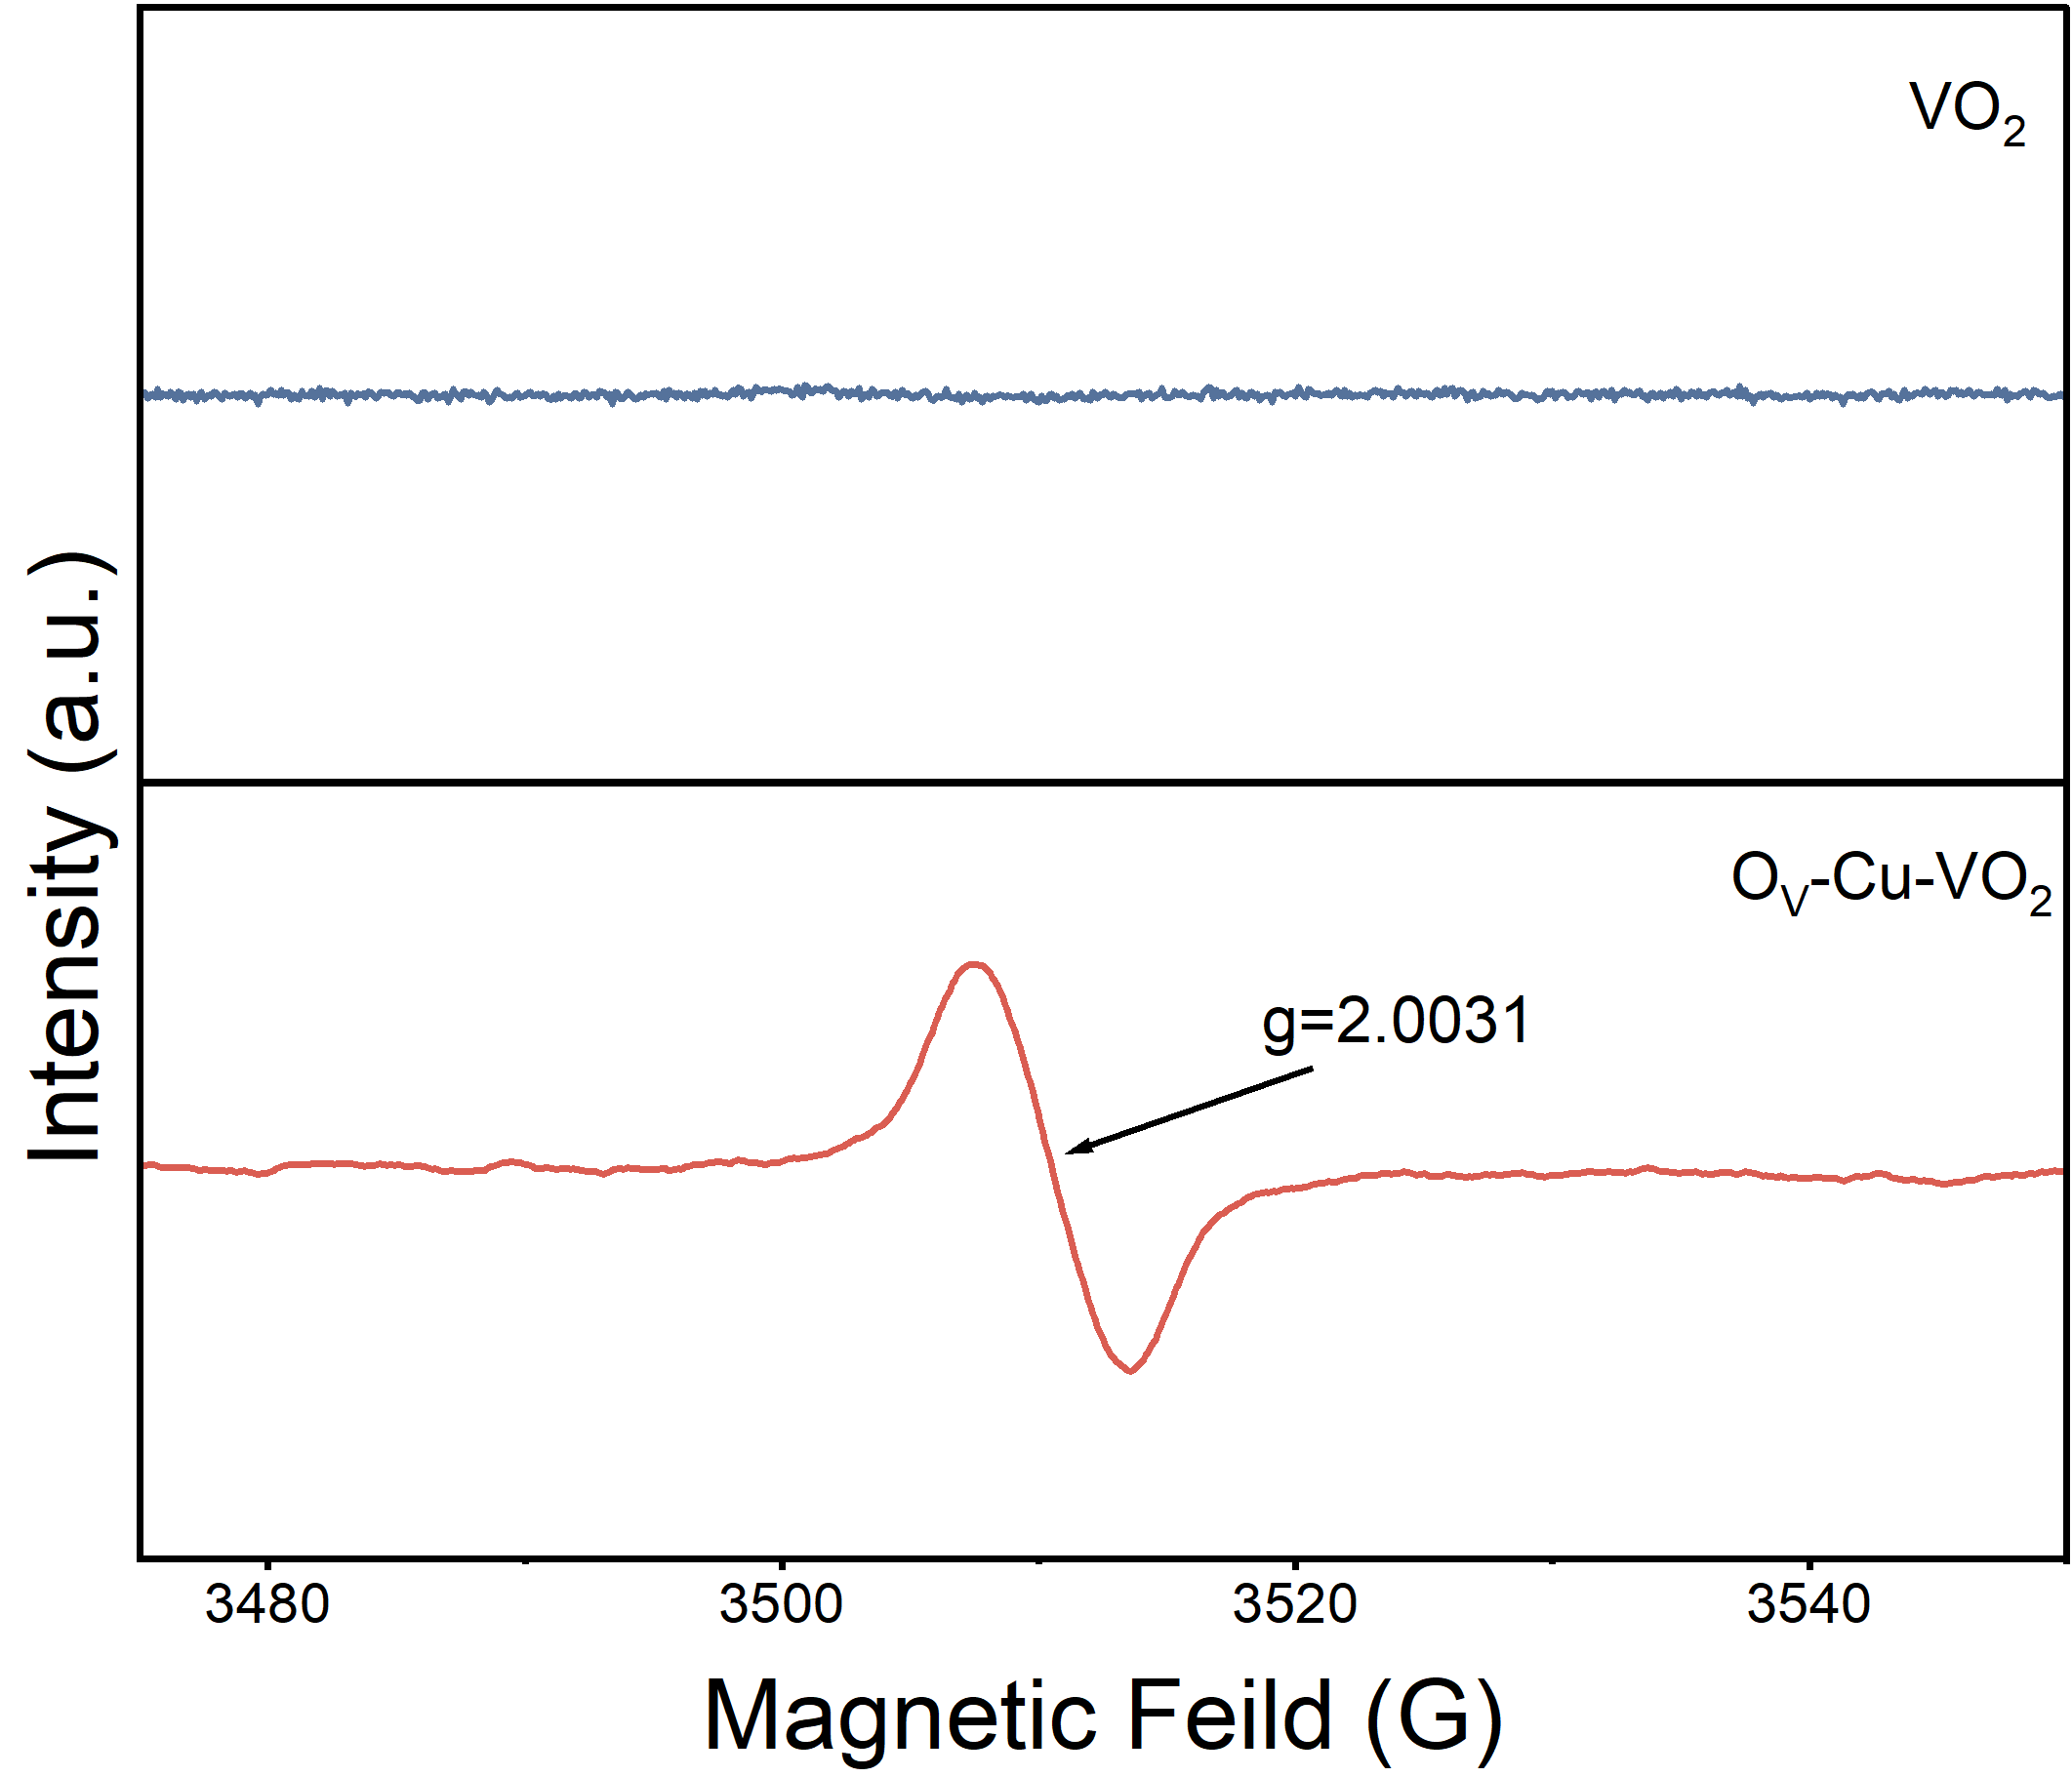


**Figure S11.** EPR of OV-Cu-VO2 and VO2. After doping with Cu, the OV-Cu-VO2 sample exhibited a distinct asymmetric signal at g = 2.0031, which proved the presence of oxygen vacancies.


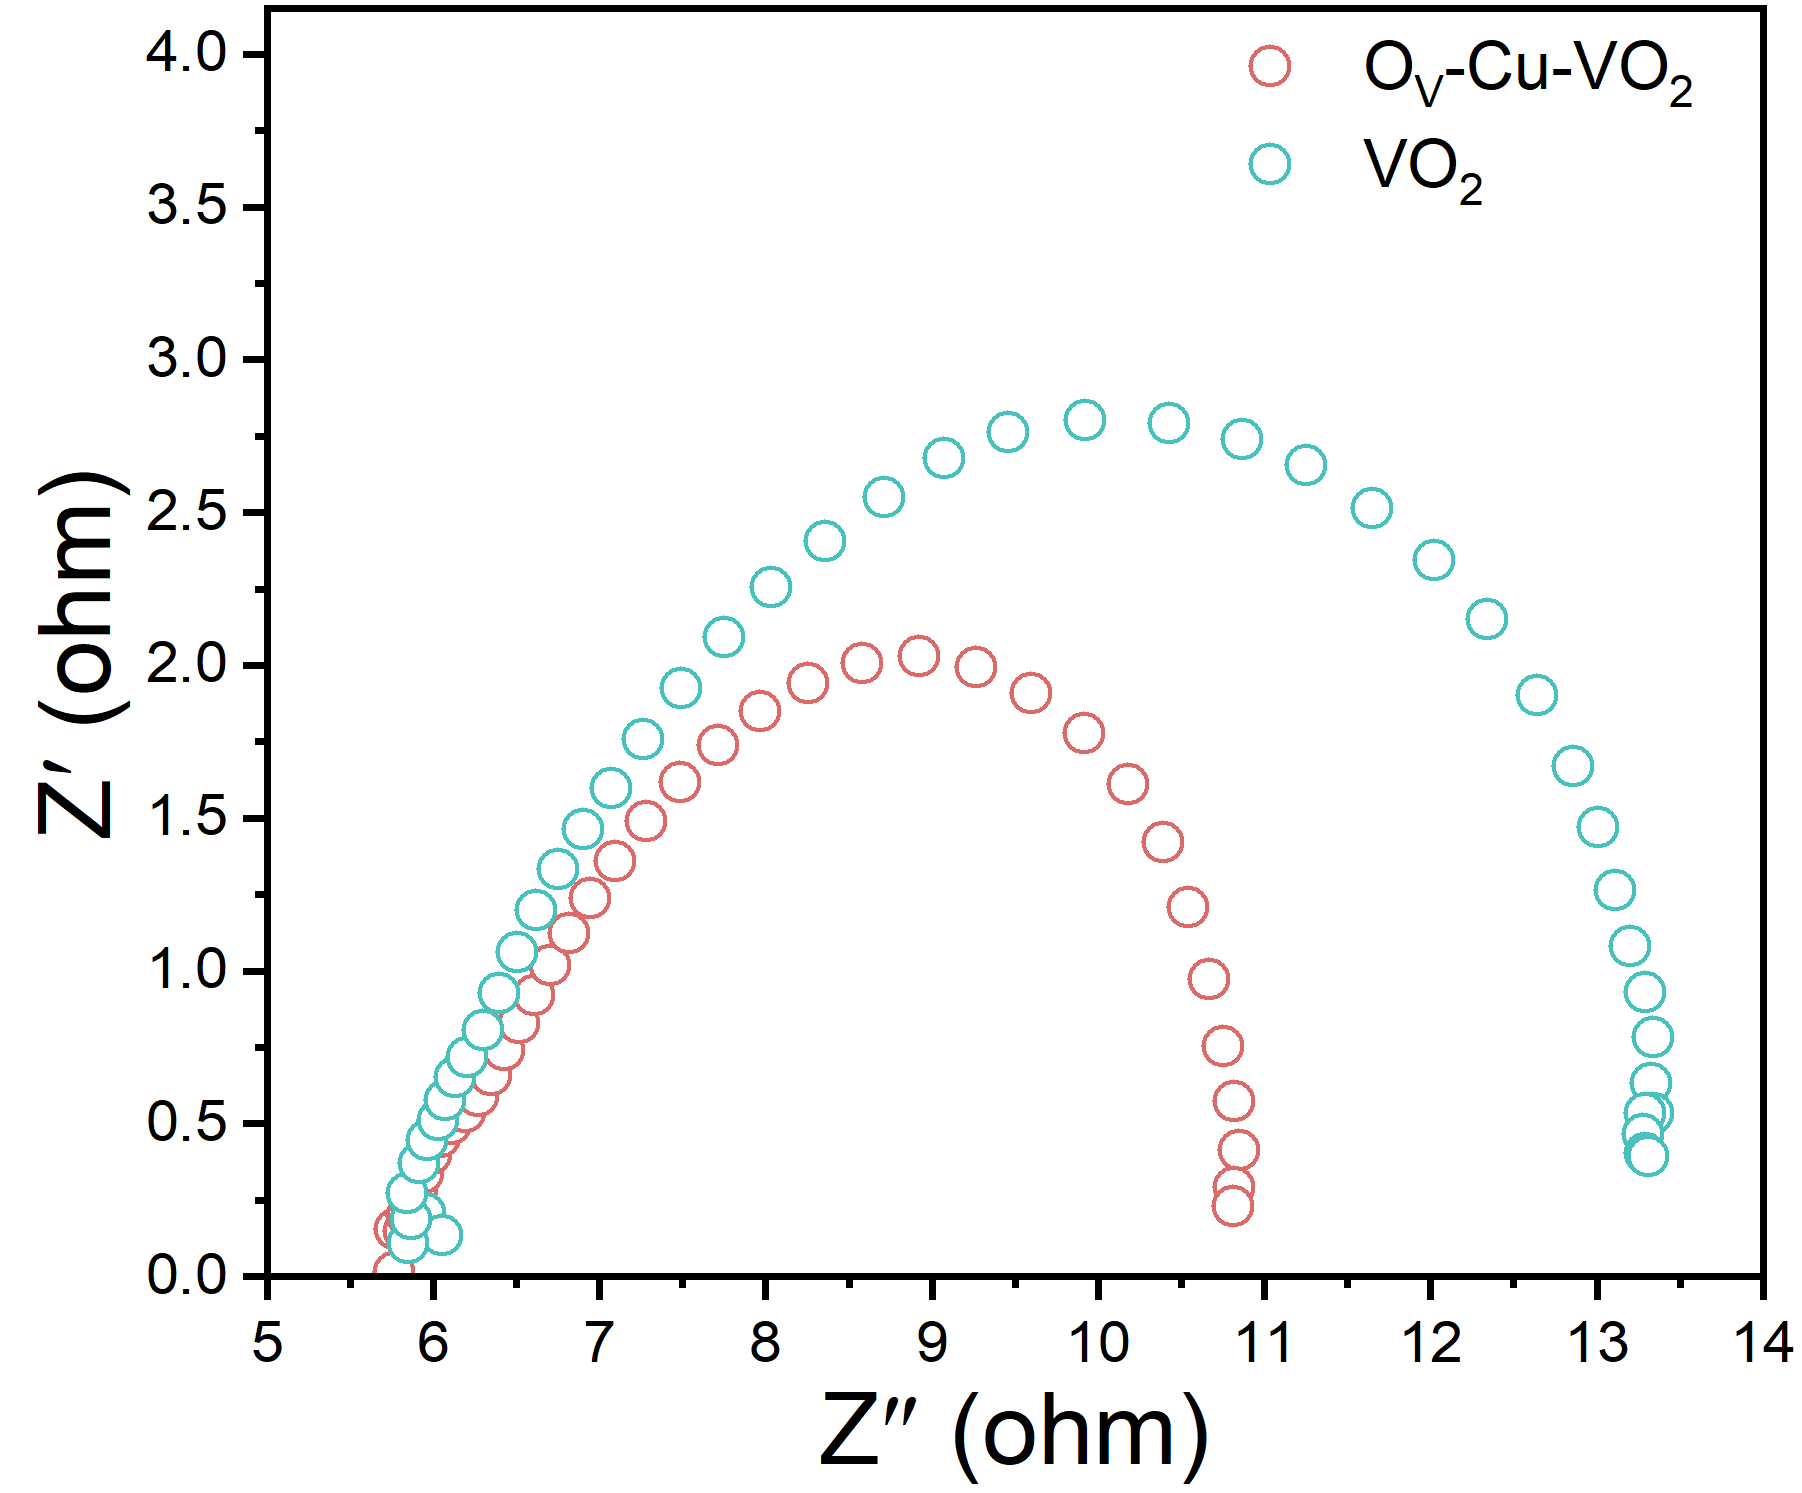


**Figure S12.** Impedance diagram of OV-Cu-VO2 and VO2. The Nyquist plot shows that the semi-circular radius of OV-Cu-VO2 is significantly smaller than that of VO2, indicating that it has the lowest charge transfer resistance (Rct), which significantly promotes the charge transfer process of NO3⁻ on the cathode surface.


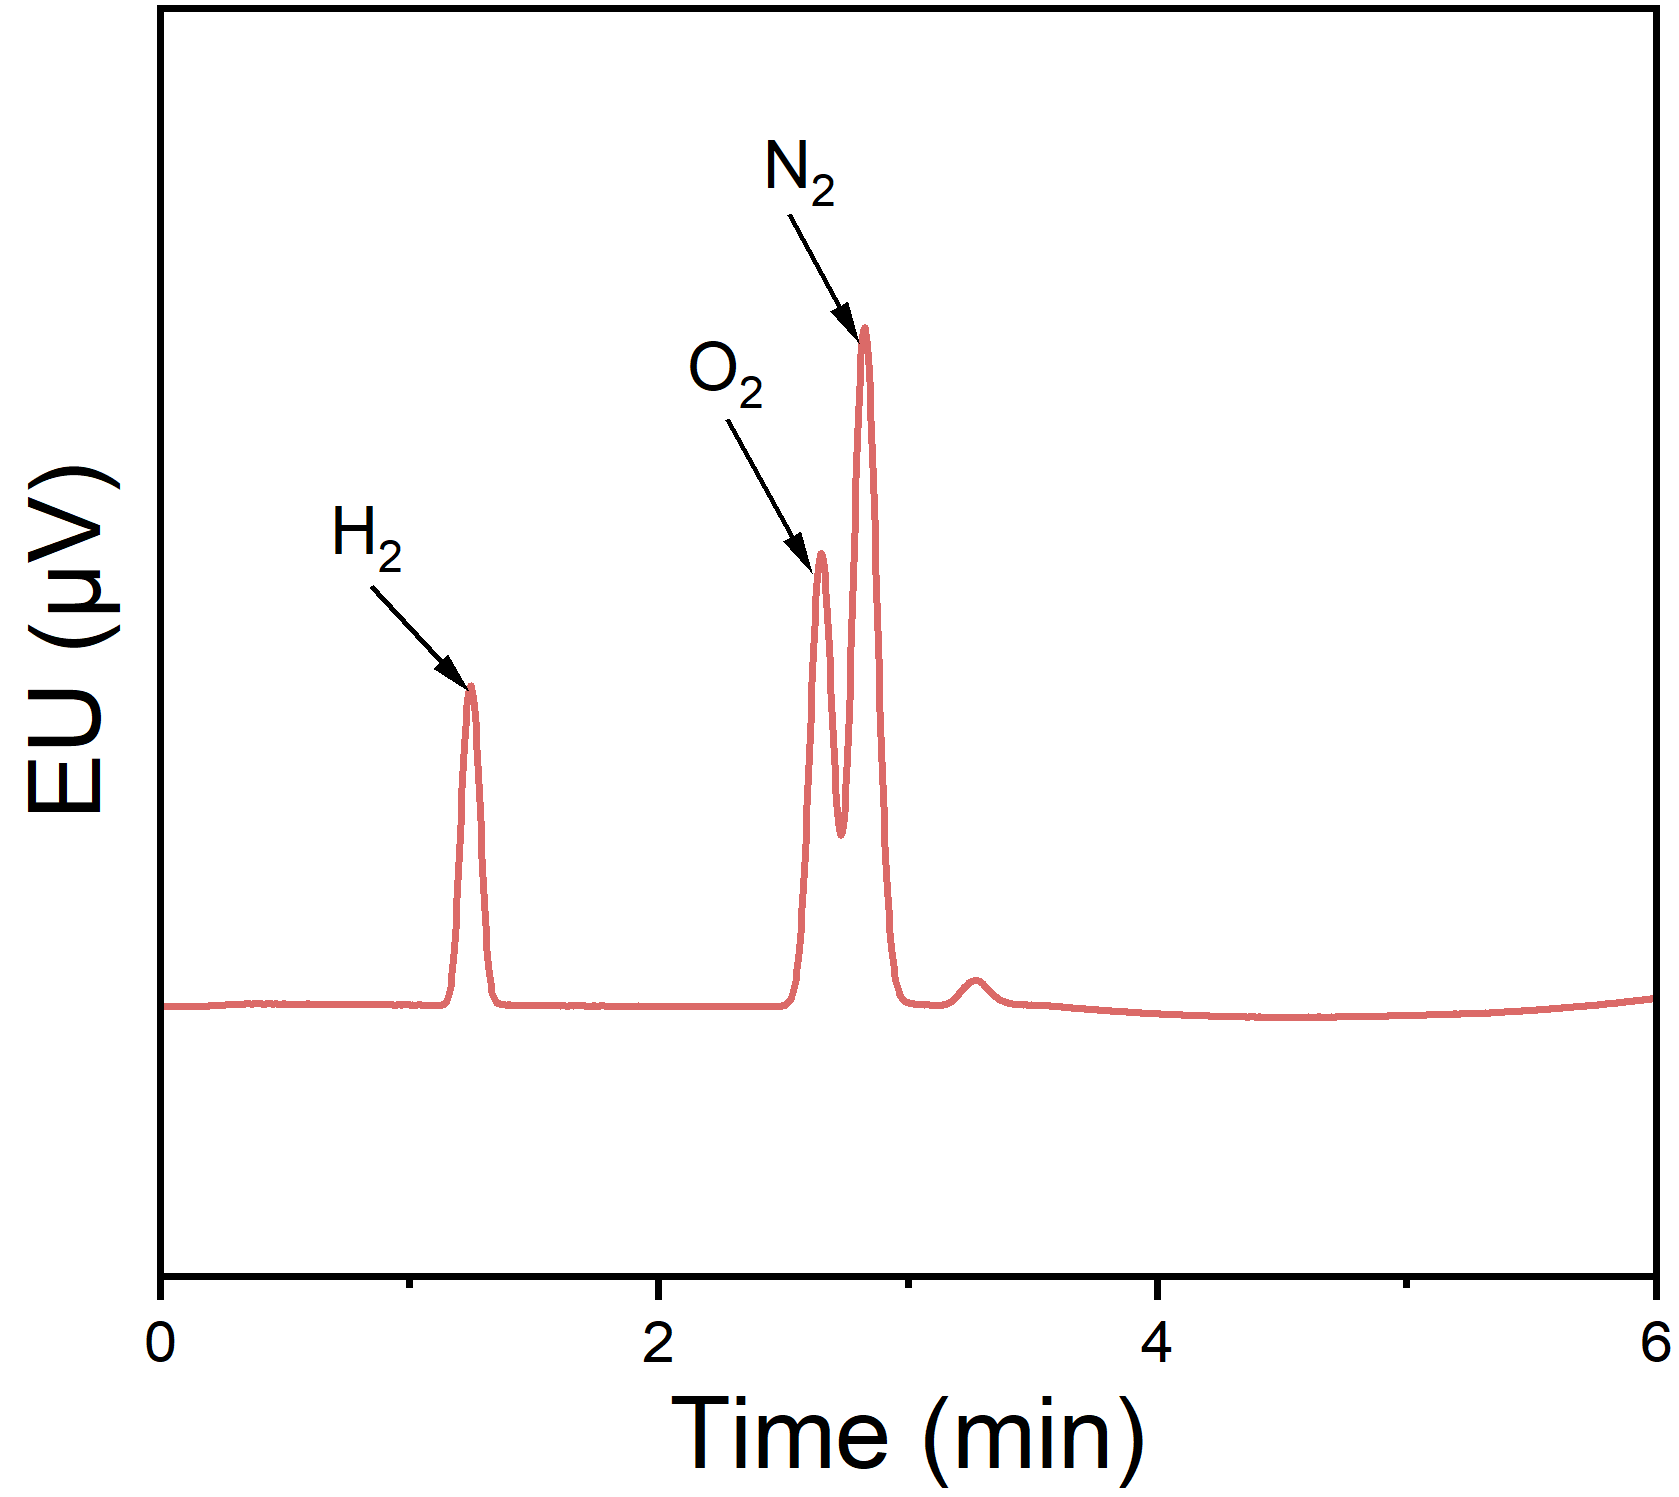


**Figure S13.** Gas chromatogram of reaction product. There were obvious characteristic peaks of N2 and H2 in the products, confirming that N2 was the main reduction product of NO3RR.


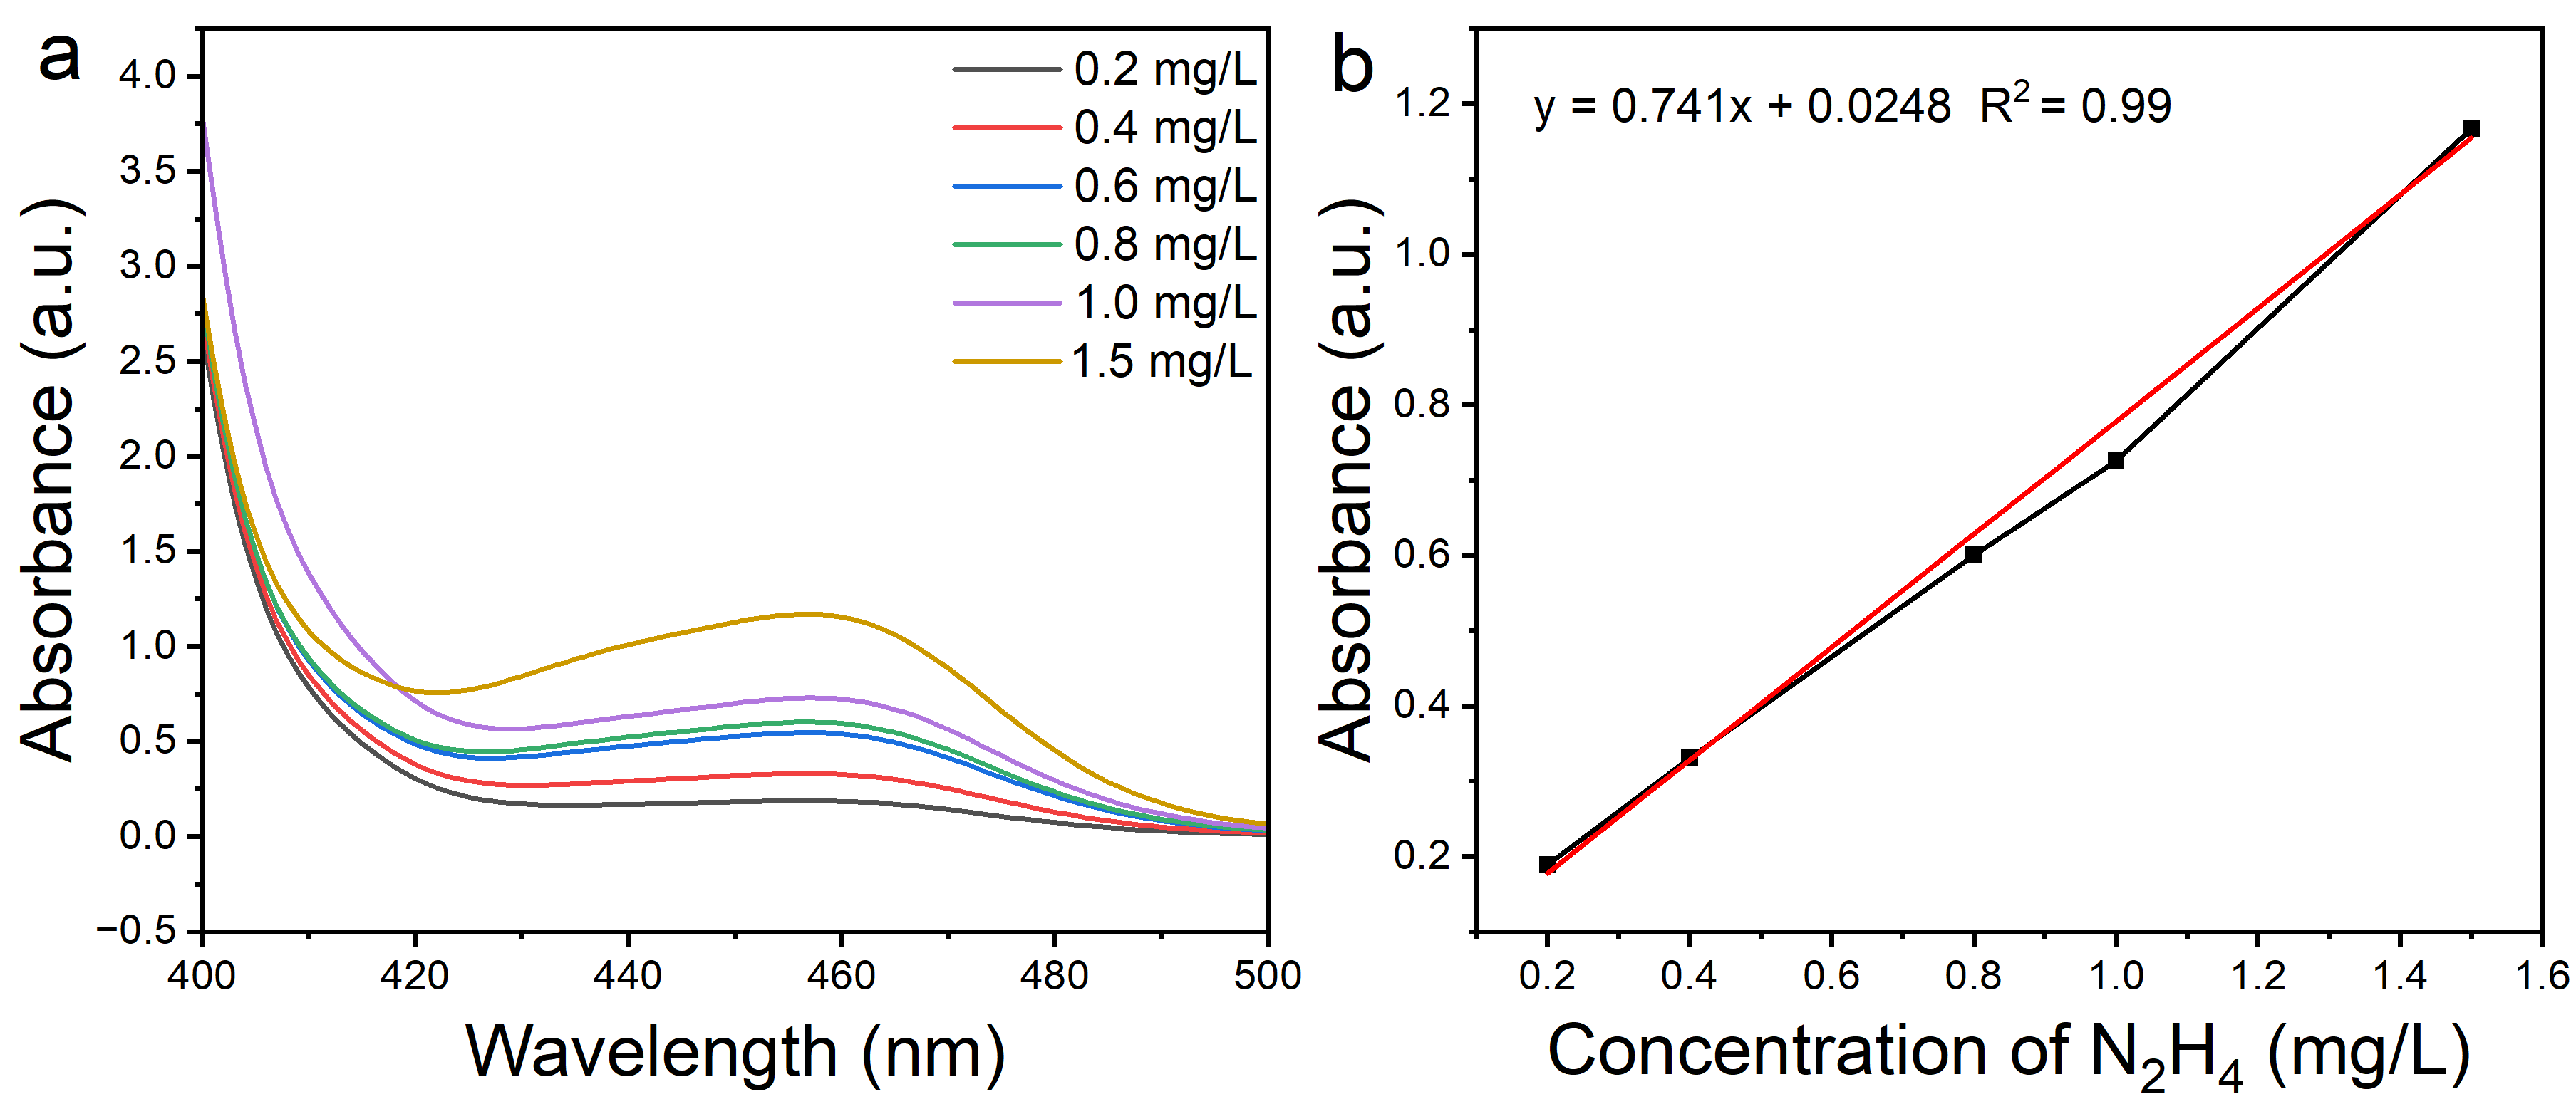


**Figure S14.** UV−vis absorption spectroscopy of different concentrations of N2H4-N (a) and the corresponding standard curves (b) A standard solution of N2H4 in water with a certain concentration was used as the reference substance for N2H4-N to draw the standard curve. Deionized water was used as the background solution. The calibration curve shows good linearity.


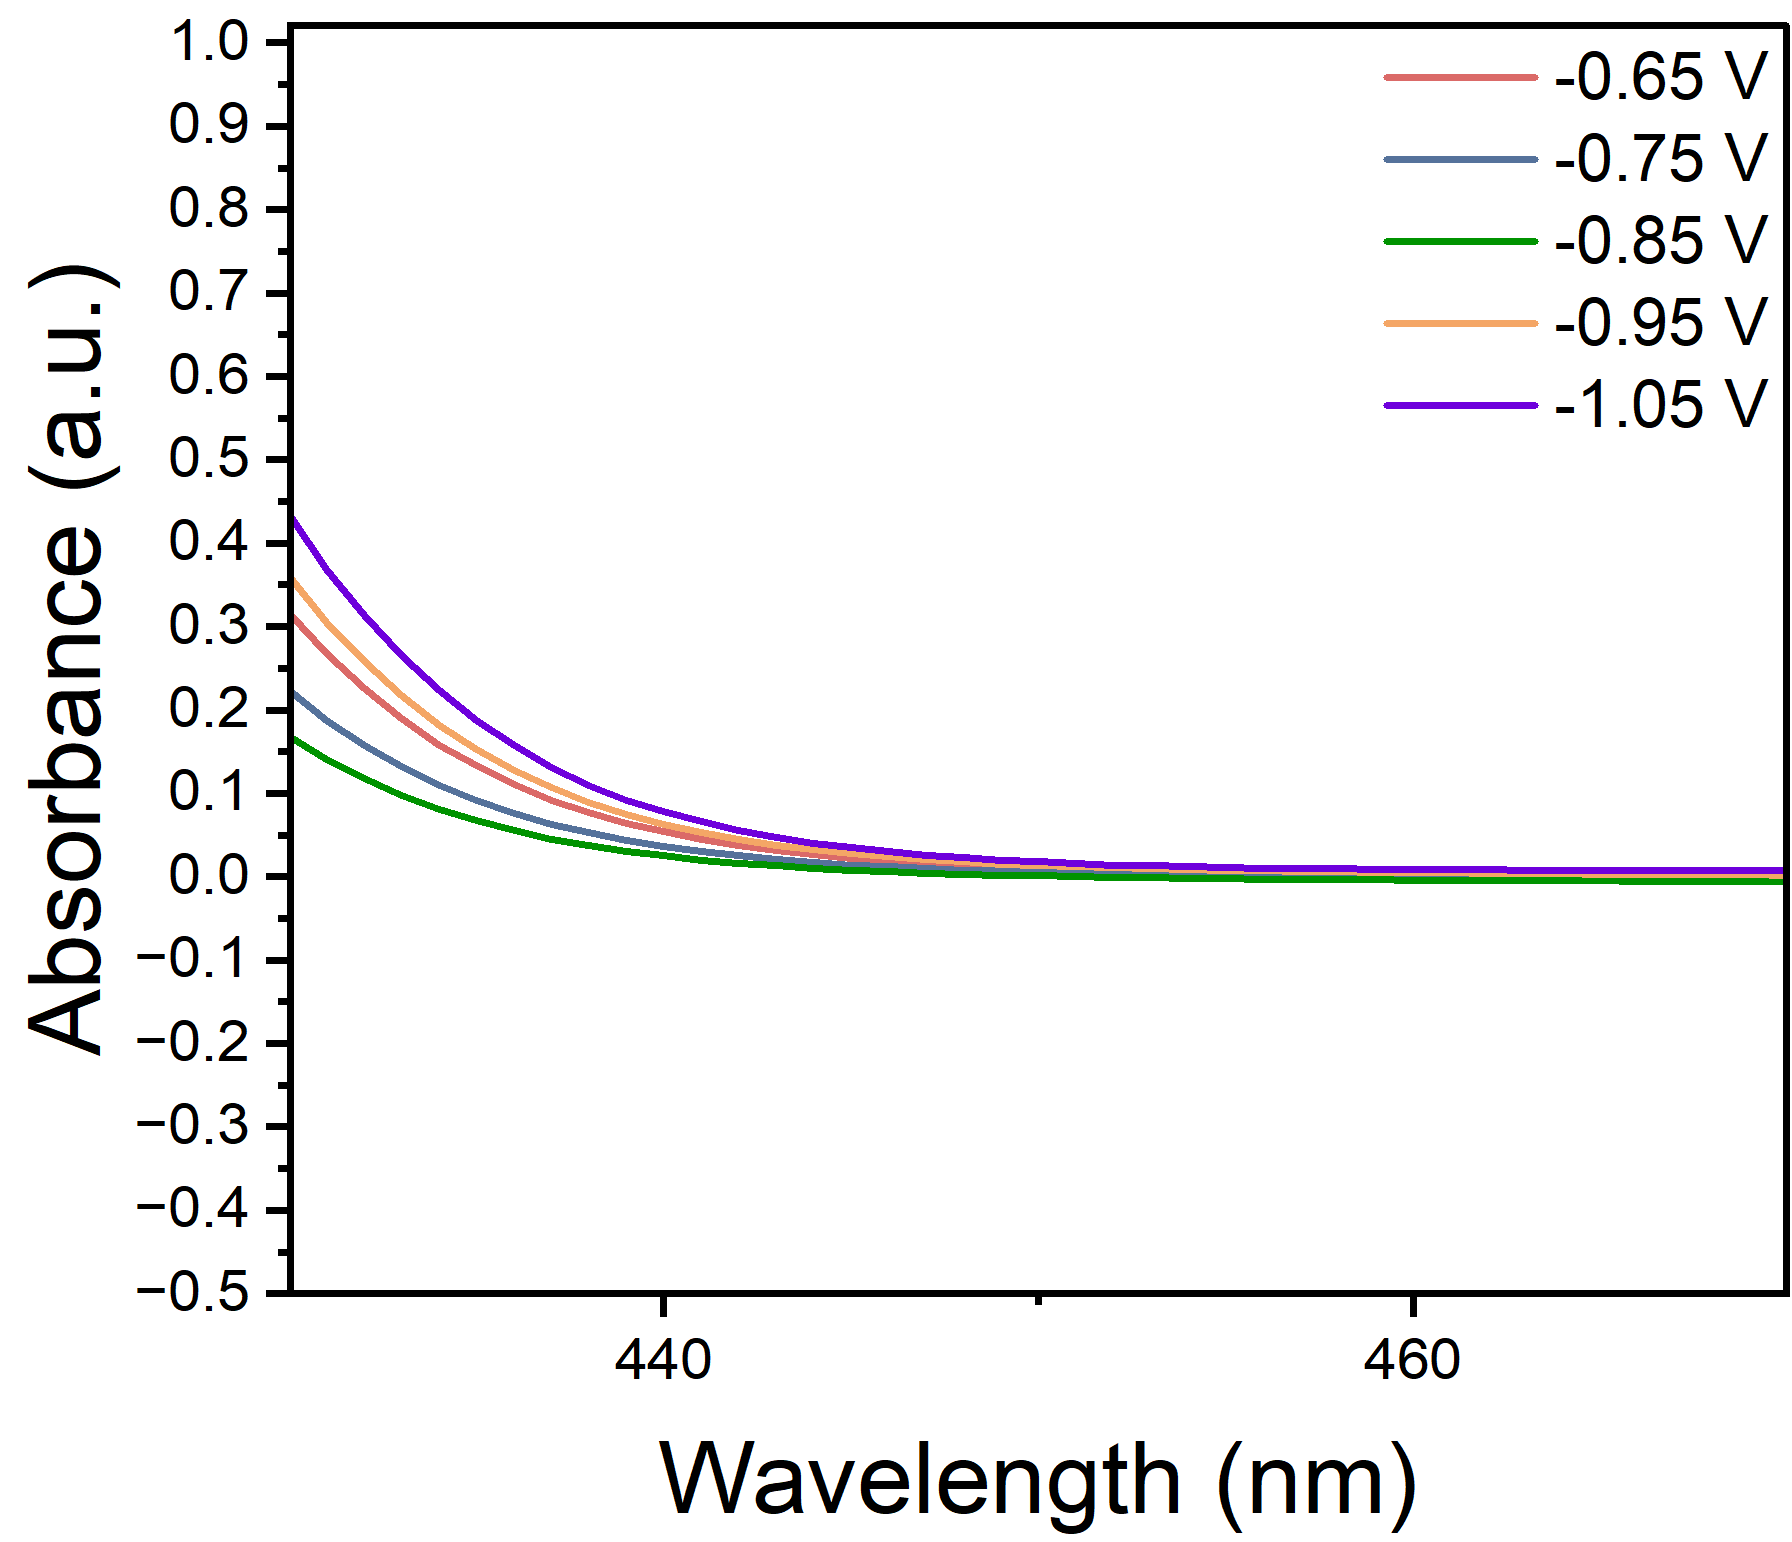


**Figure S15.** UV−vis absorption spectroscopy of N2H4 at various potentials.


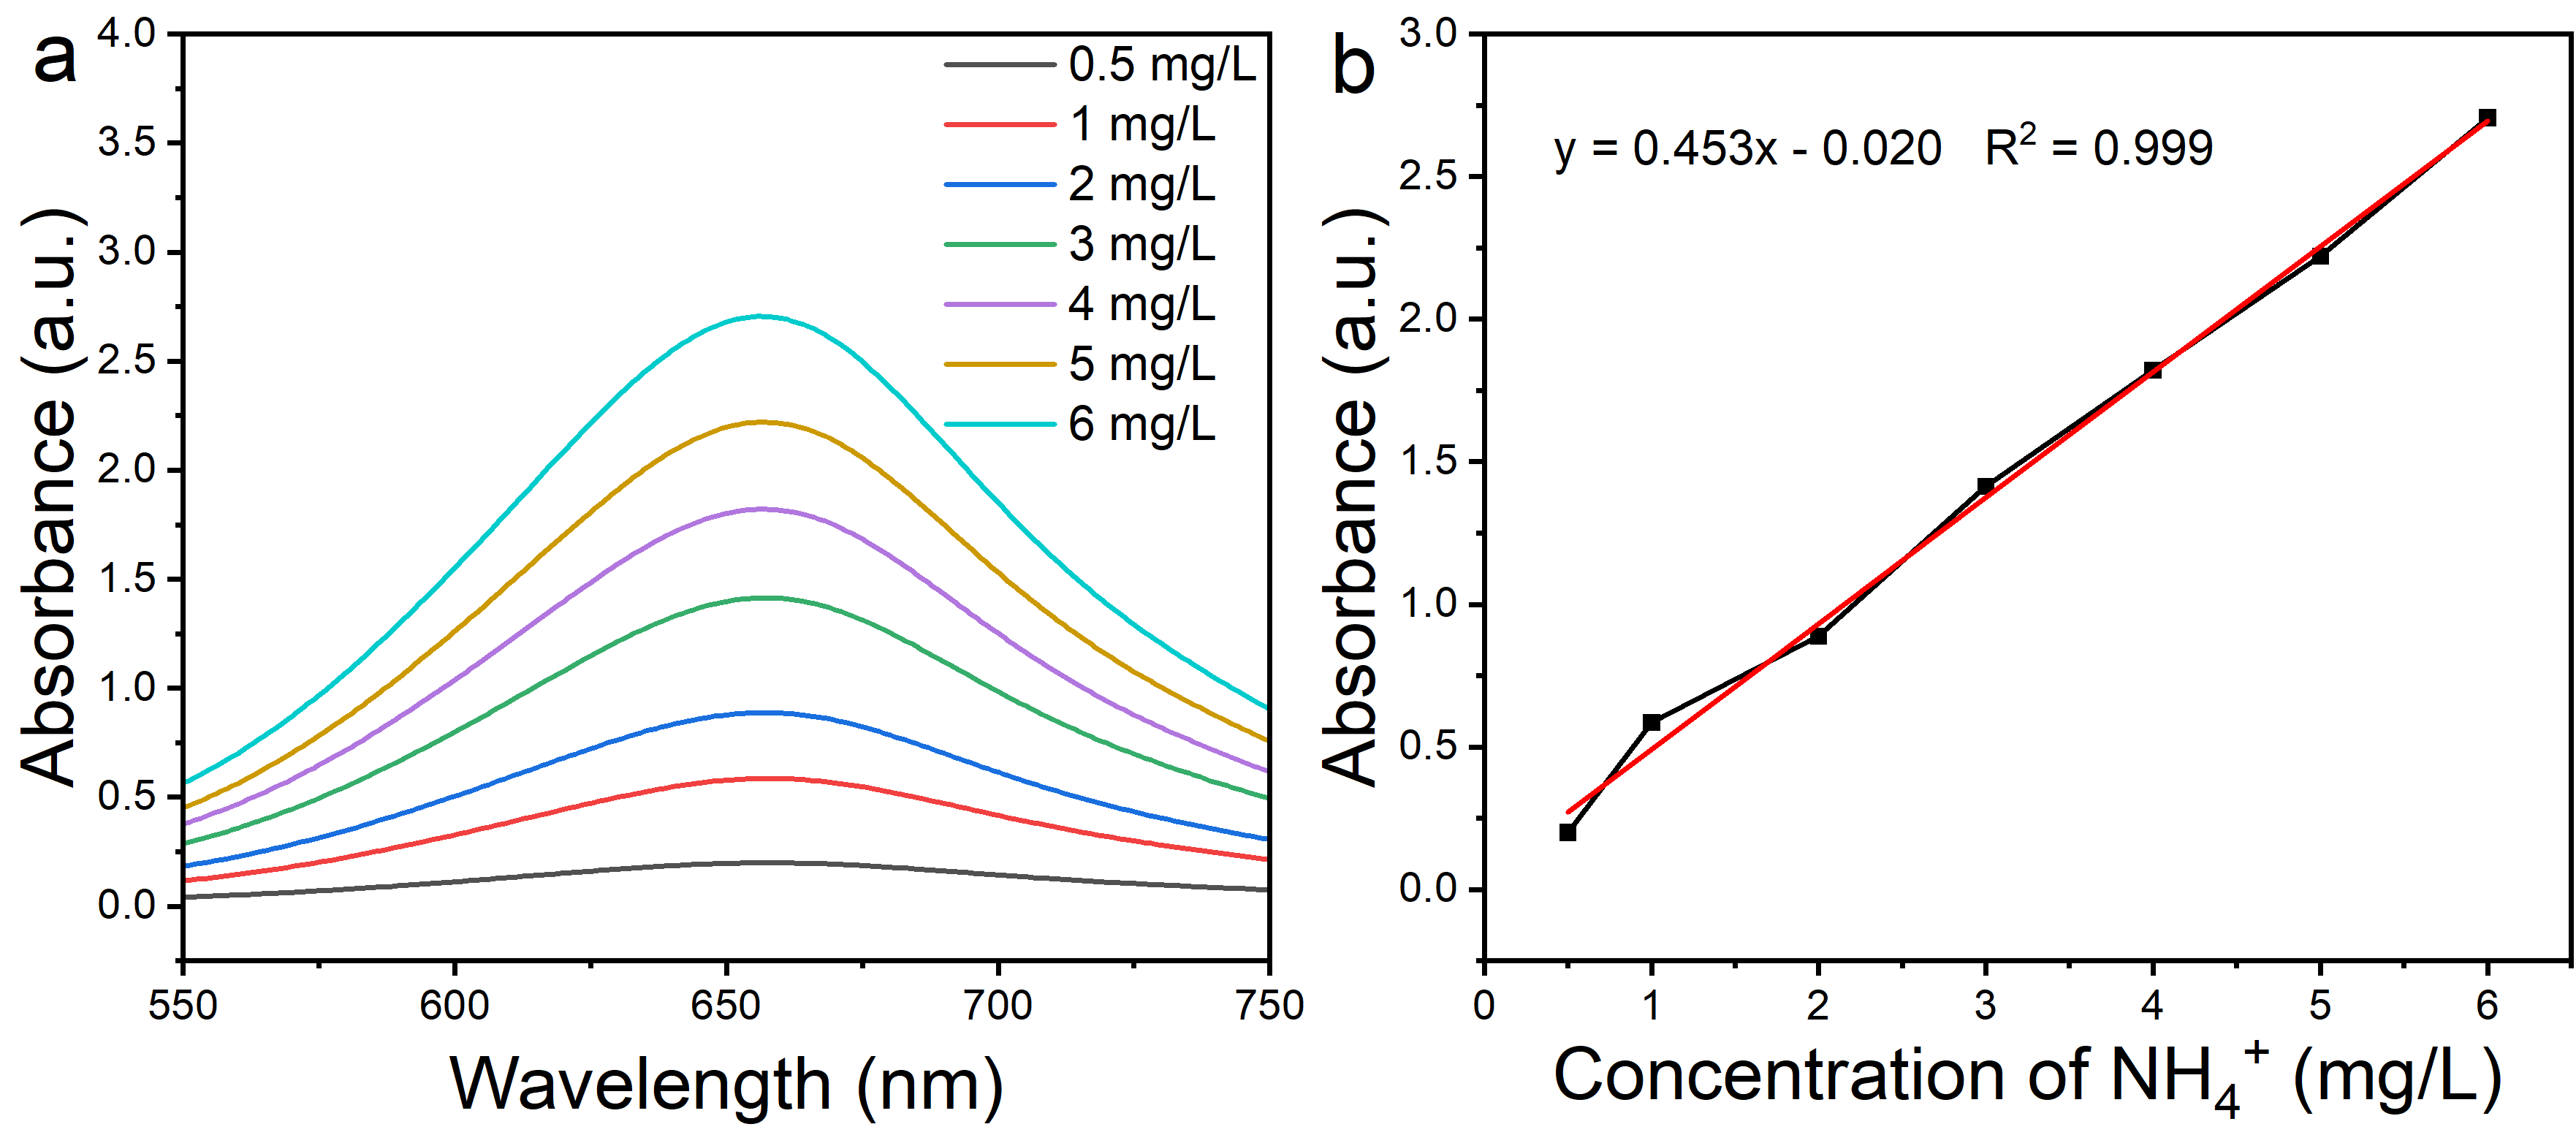


**Figure S16.** UV−vis absorption spectroscopy of indophenol blue spectrophotometry with different concentrations of ammonia-N (a) and the corresponding standard curve (b) A 10 mg/L standard solution of ammonia was used as ammonia-N sources for standard curve preparation. Deionized water was used as the background solution. The calibration curve shows good linearity.


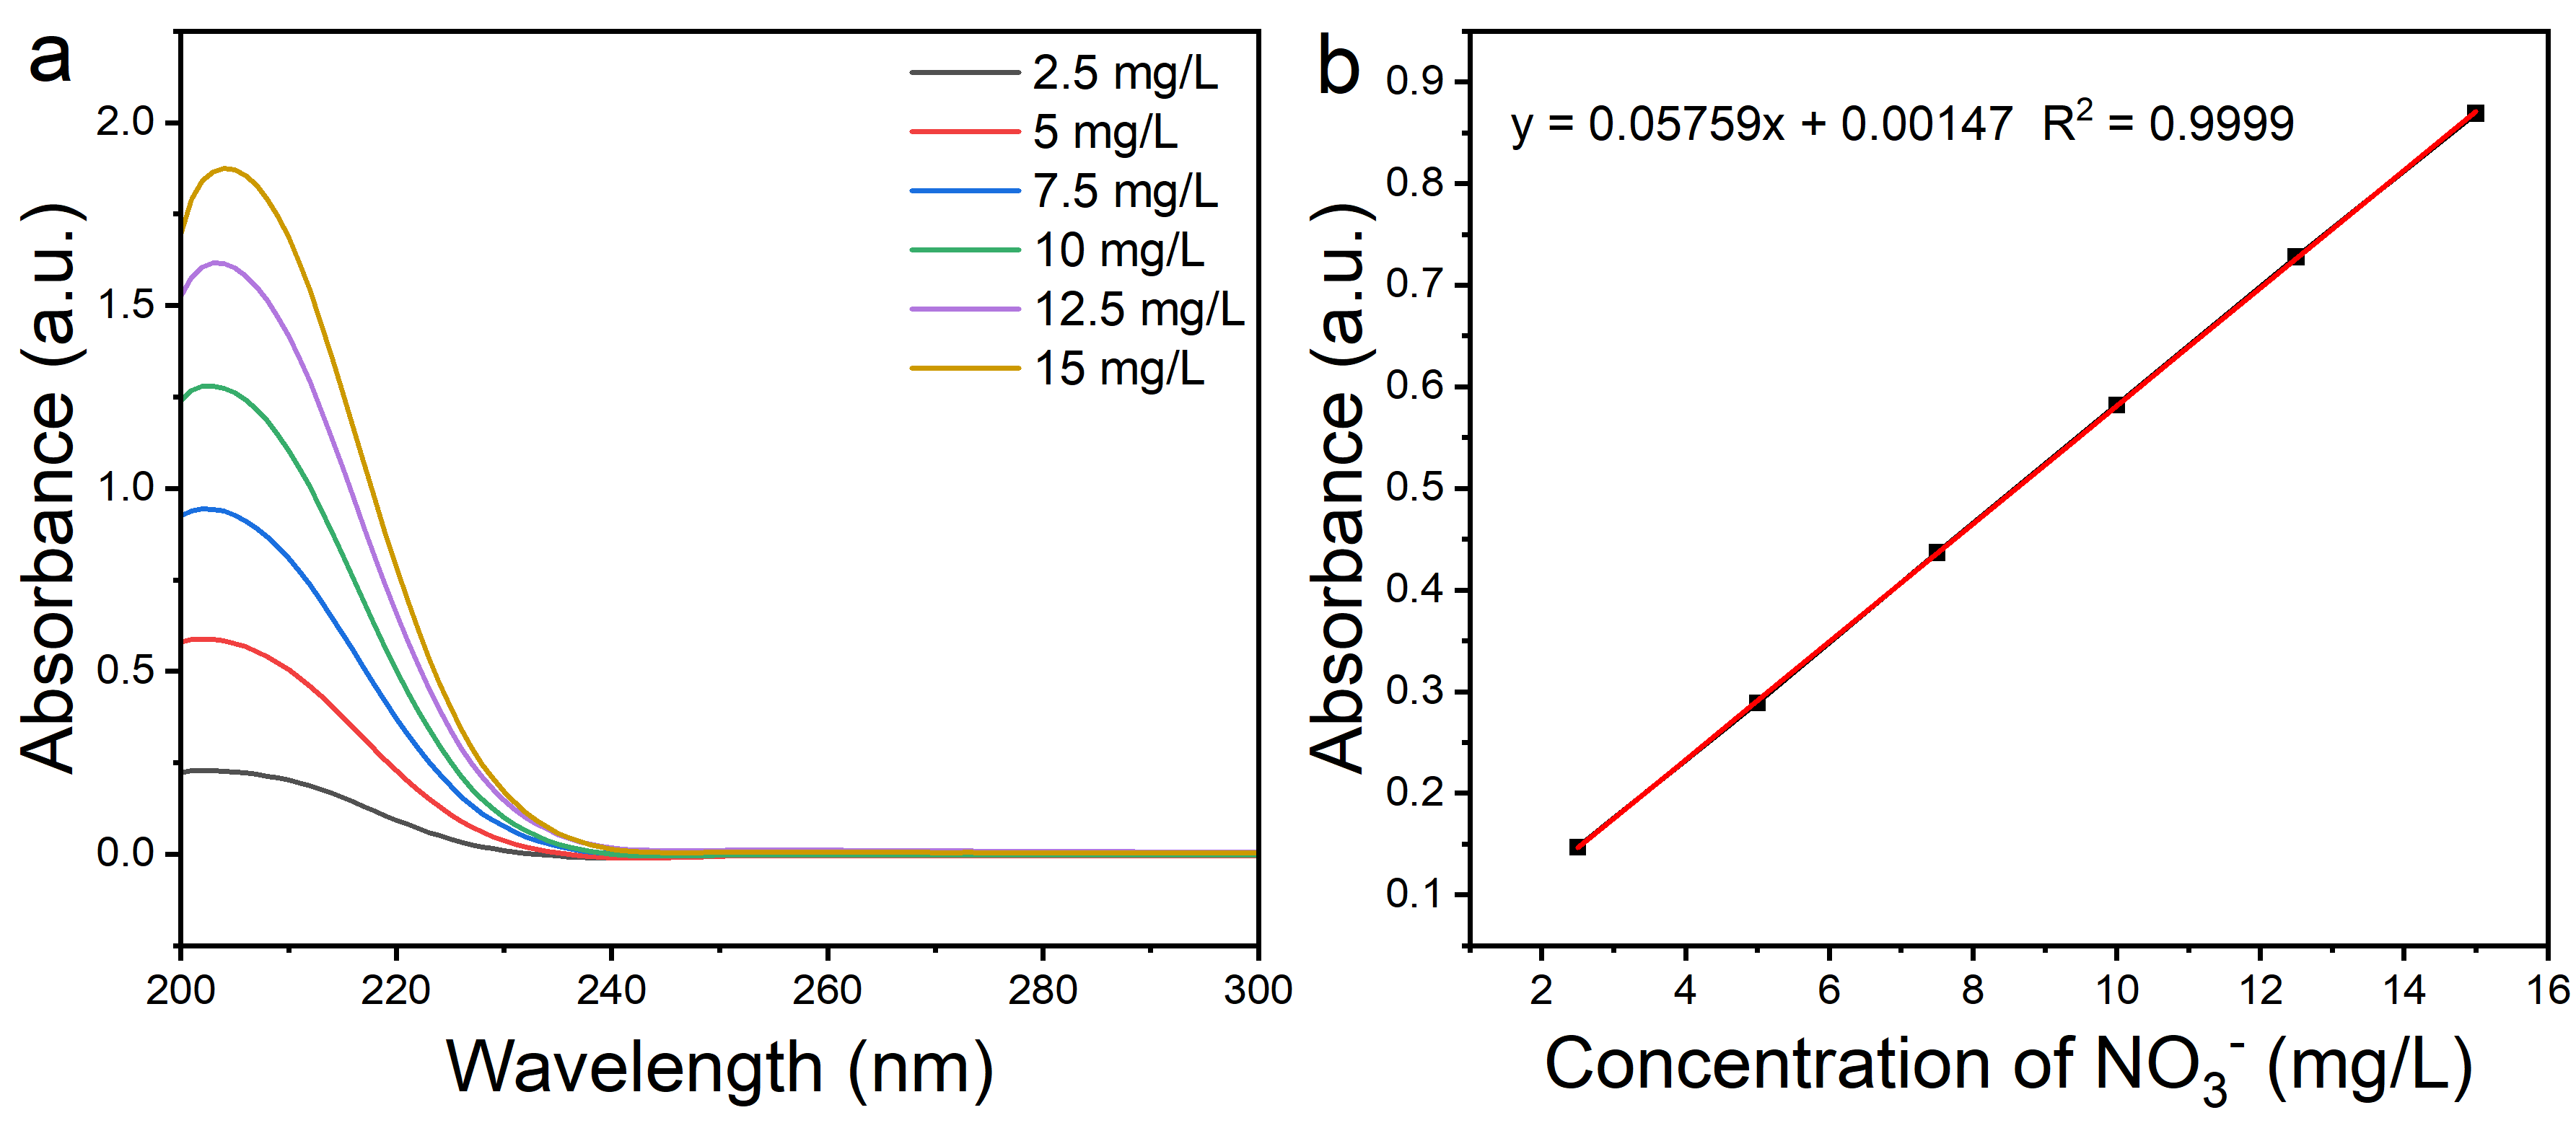


**Figure S17.** The UV−vis absorption spectroscopy (a) and the corresponding standard curves (b) of the diazotization spectrophotometric method for different concentrations of nitrate-N. Potassium nitrate was used as the source of nitrate-N standard substances to prepare the standard curves. Deionized water was used as the background solution. The calibration curve shows good linearity.


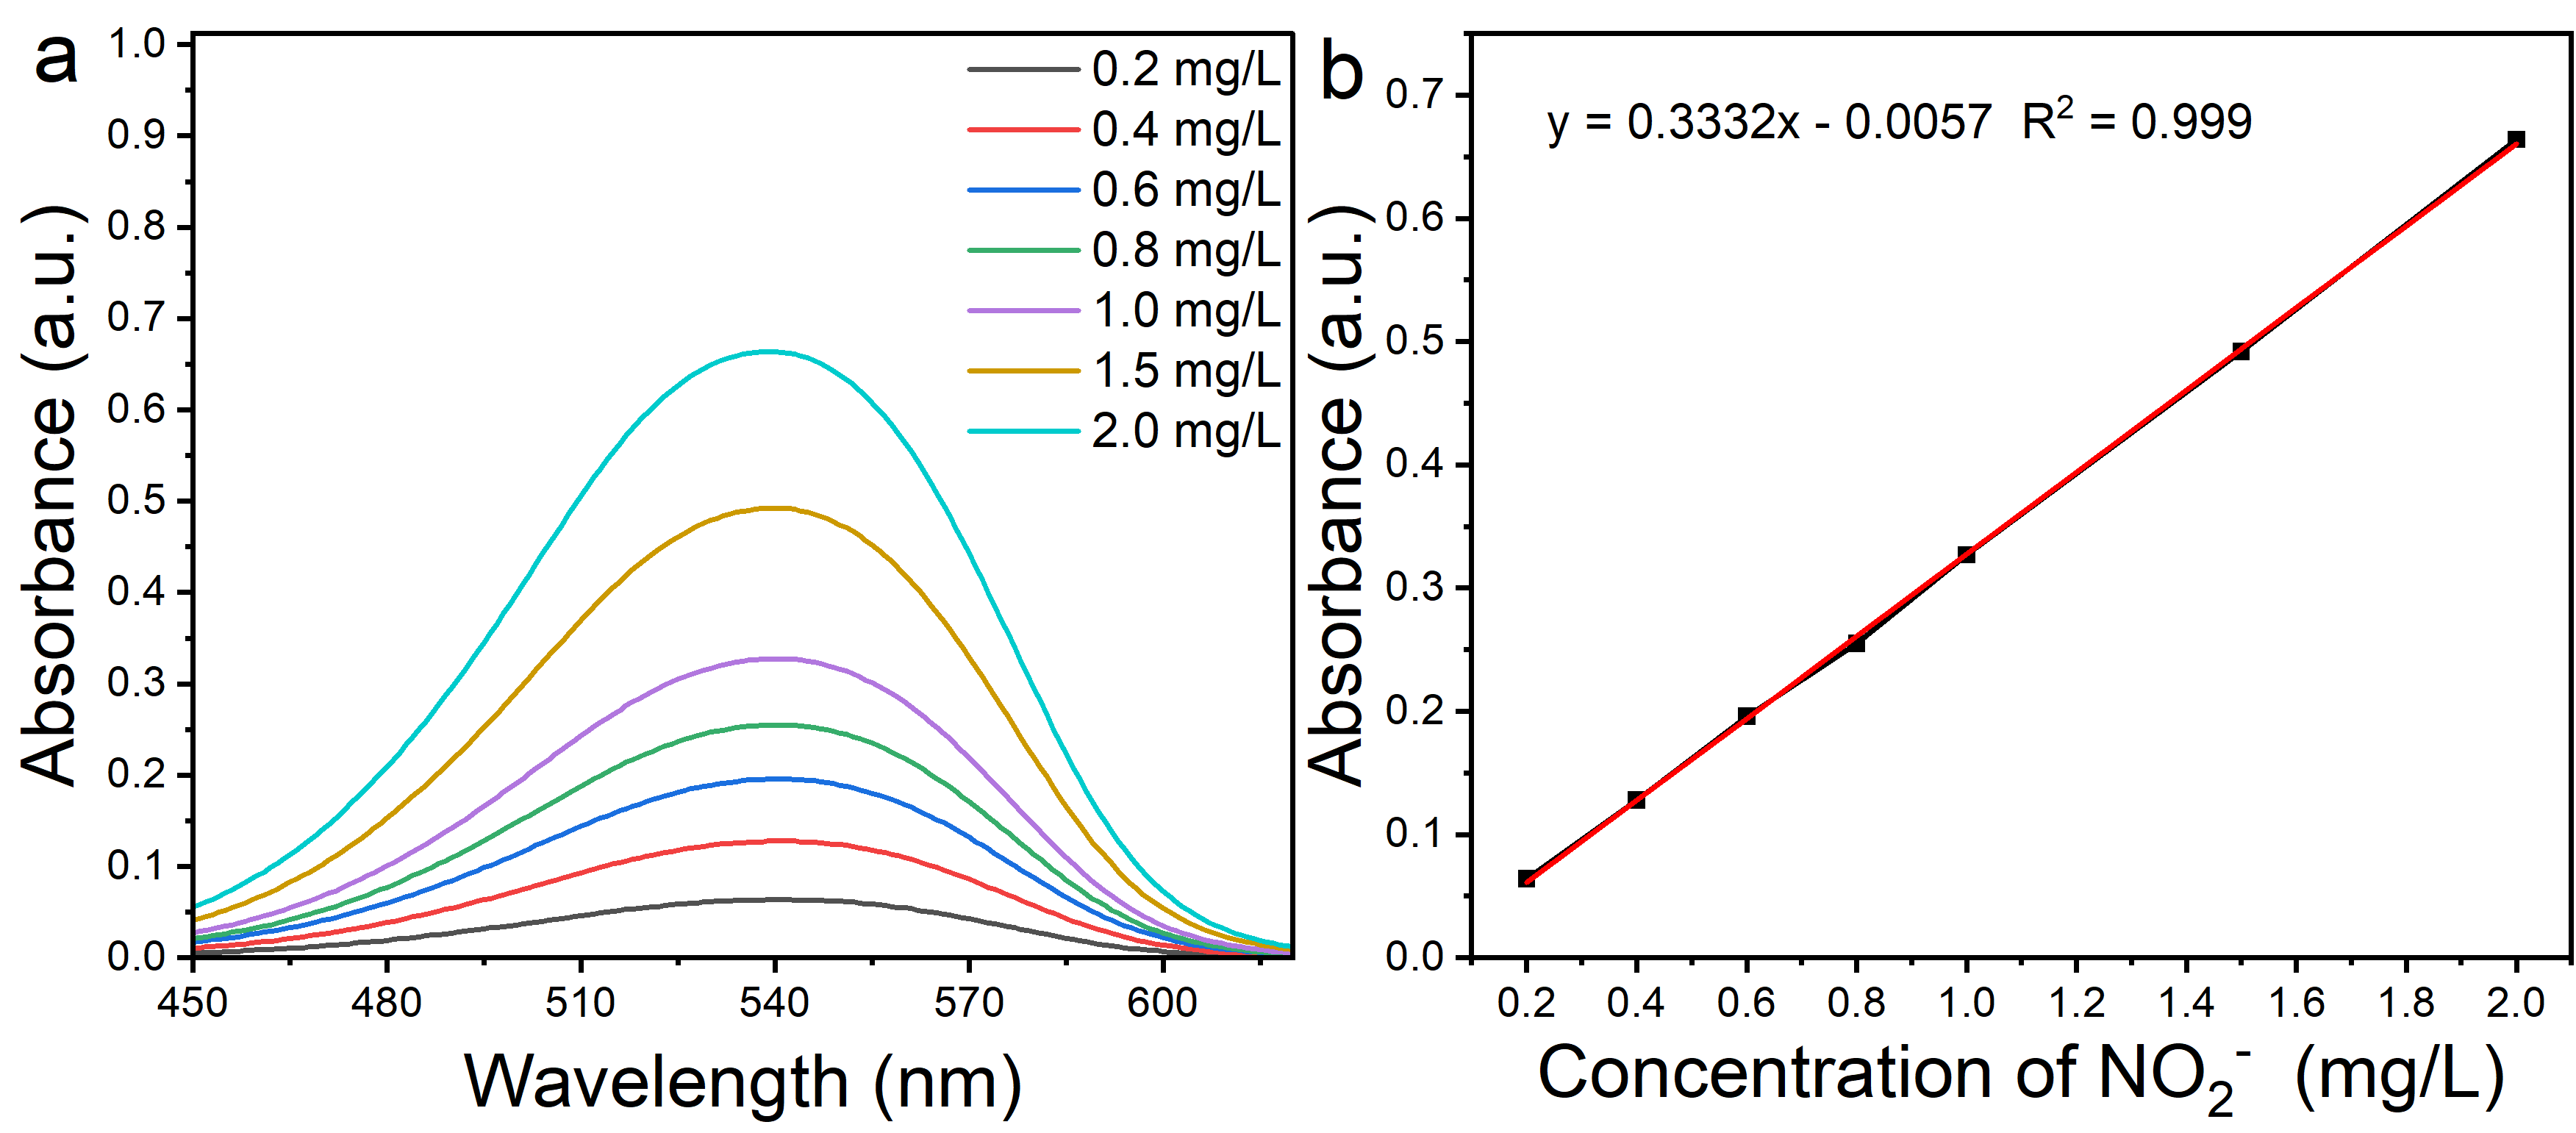


**Figure S18.** UV−vis absorption spectroscopy of diazotization spectrophotometry with different concentrations of nitrite-N (a) and the corresponding standard curve (b) Potassium nitrite was used as nitrite-N sources for standard curve preparation. Deionized water was used as the background solution. The calibration curve shows good linearity.


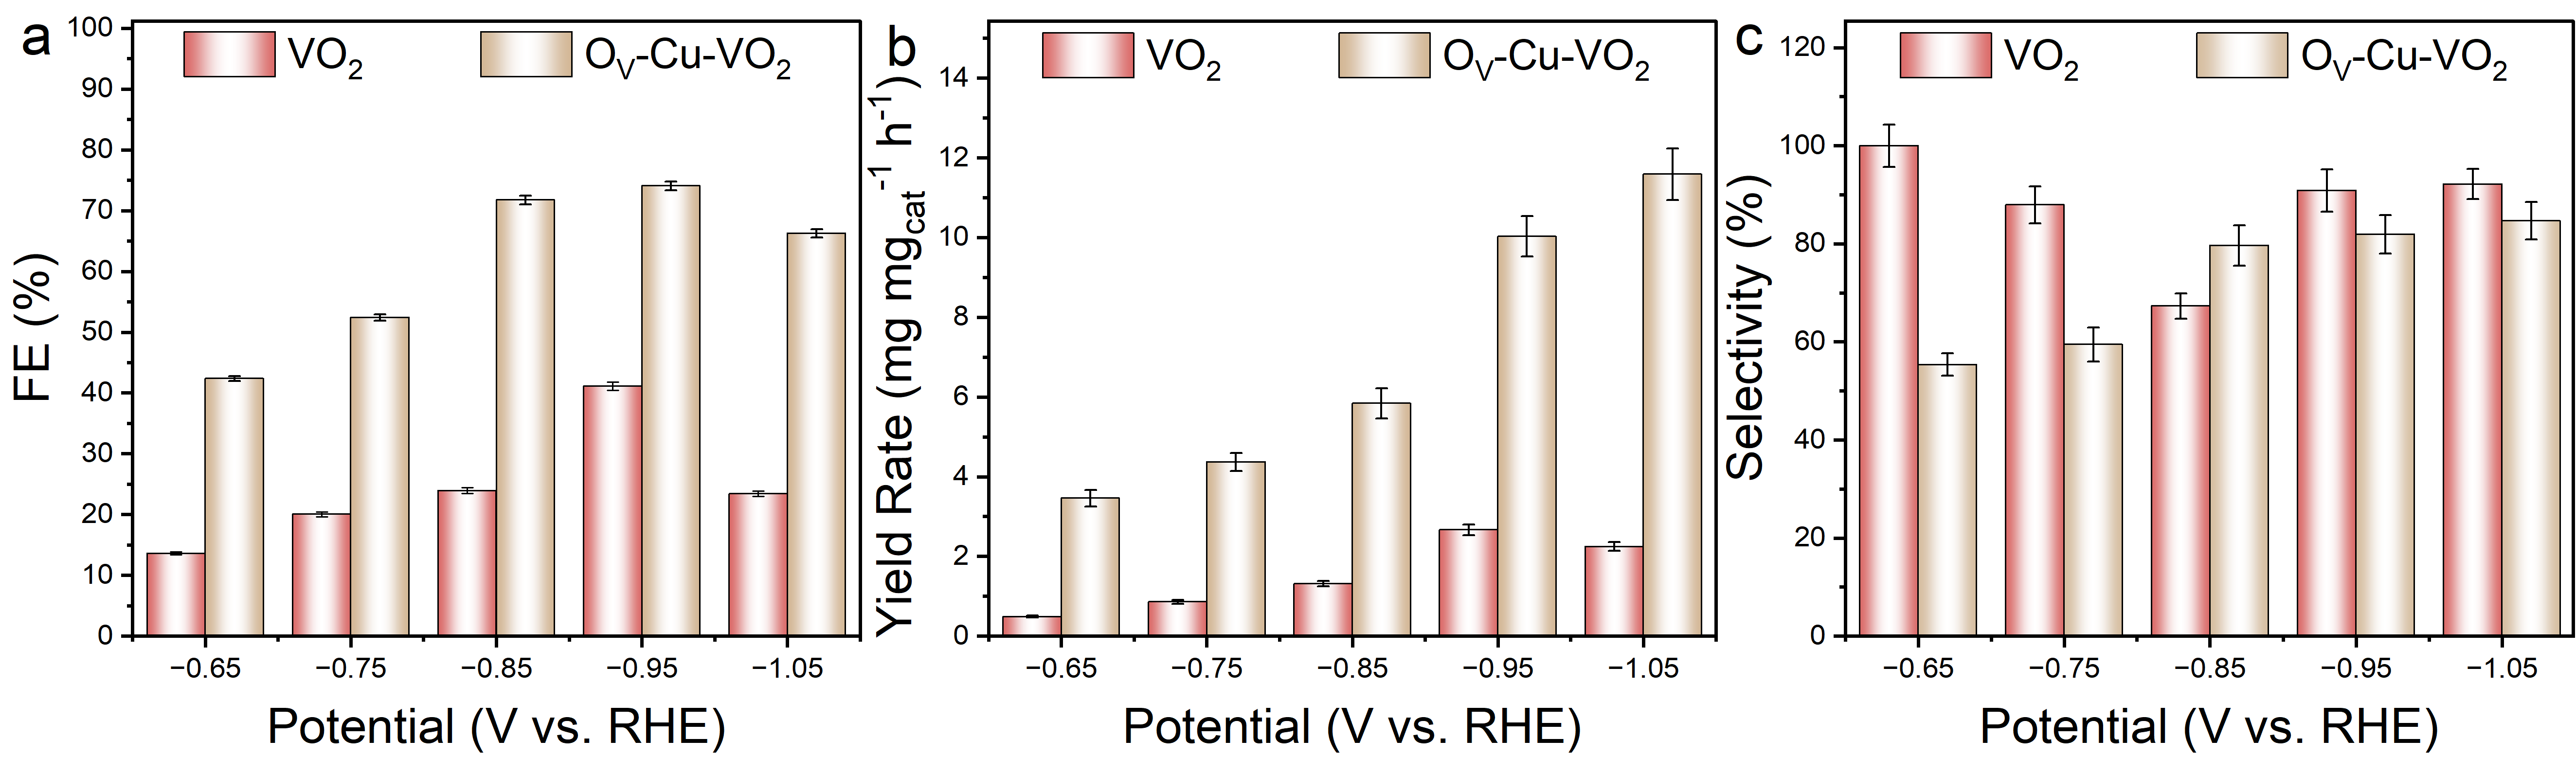


**Figure S19.** (a) FE (b) yield and (c) selectivity of the product N2 in the 1 h electrolysis experiment of OV-Cu-VO2 and VO2 in Ar/O2 atmosphere. The electrolyte is 0.05 M H2SO4+0.1 M KNO3. Overall, OV-Cu-VO2 has the best performance in reducing nitrate to N2.


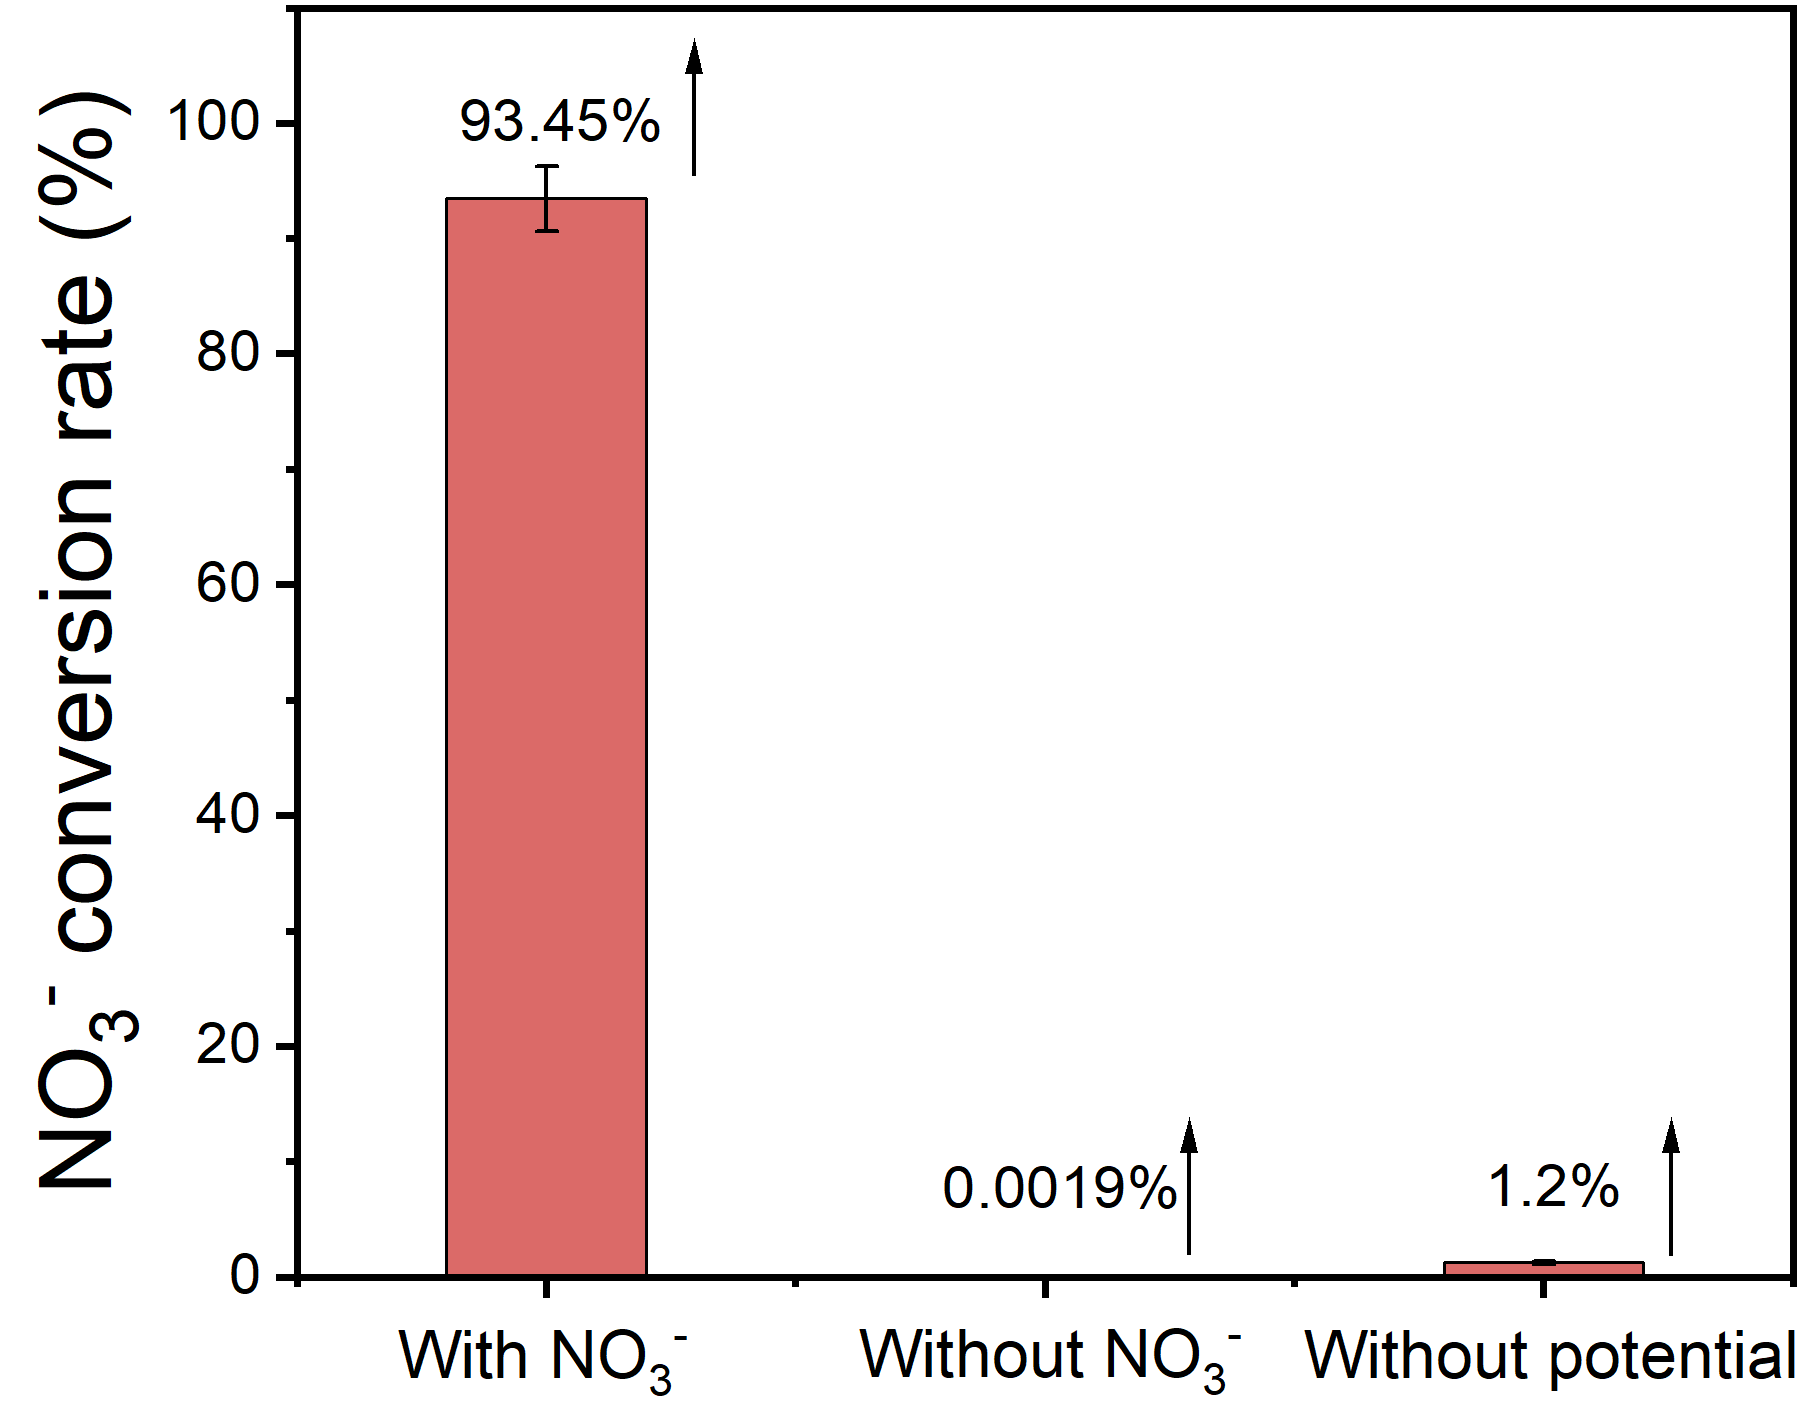


**Figure S20.** Performance tests of the OV-Cu-VO2 catalyst under open-circuit potential were conducted in electrolytes without KNO3 and in electrolytes containing 100 mg/L NO3⁻.The experimental results showed that the NO3⁻ conversion rates measured under both conditions were negligible.
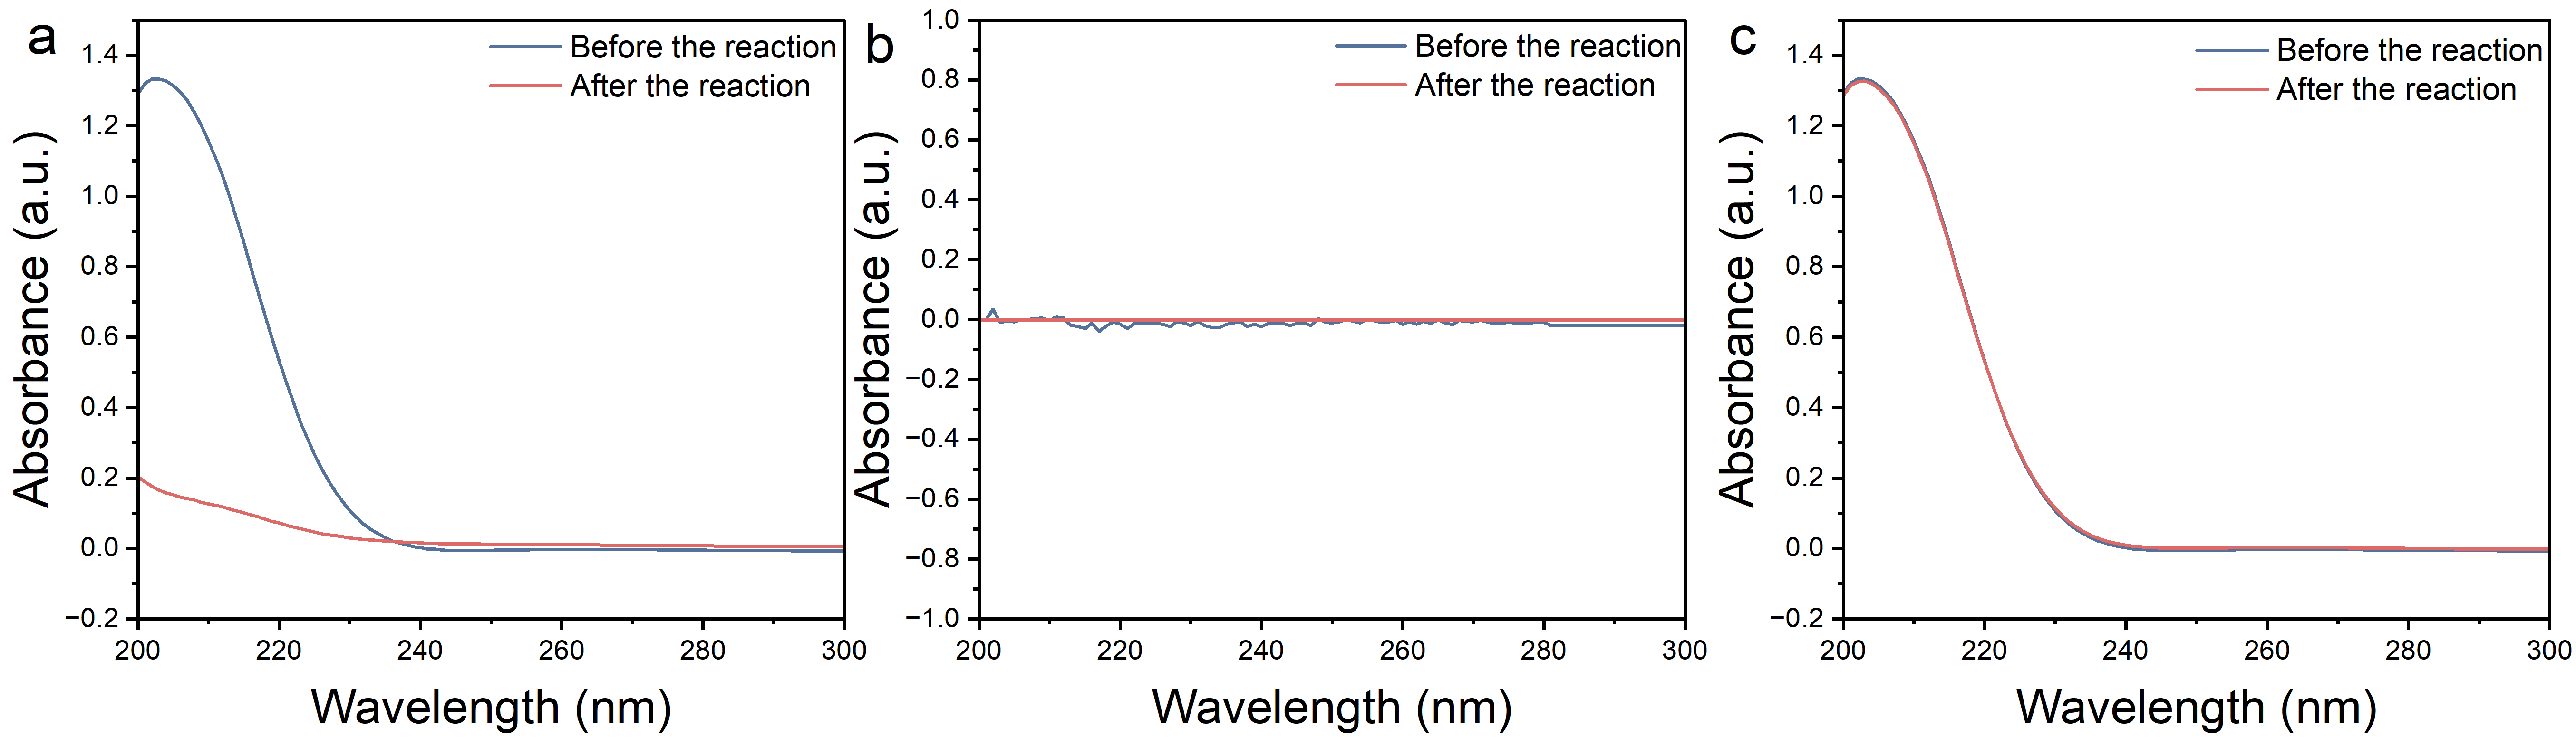


**Figure S21.** The UV−vis absorption spectroscopy of (a) the electrolyte containing 100 mg/L NO3⁻ (b) the one without NO3⁻ and (c) the one containing 100 mg/L NO3⁻ before and after reacting for the same period of time under an electrically neutral condition.


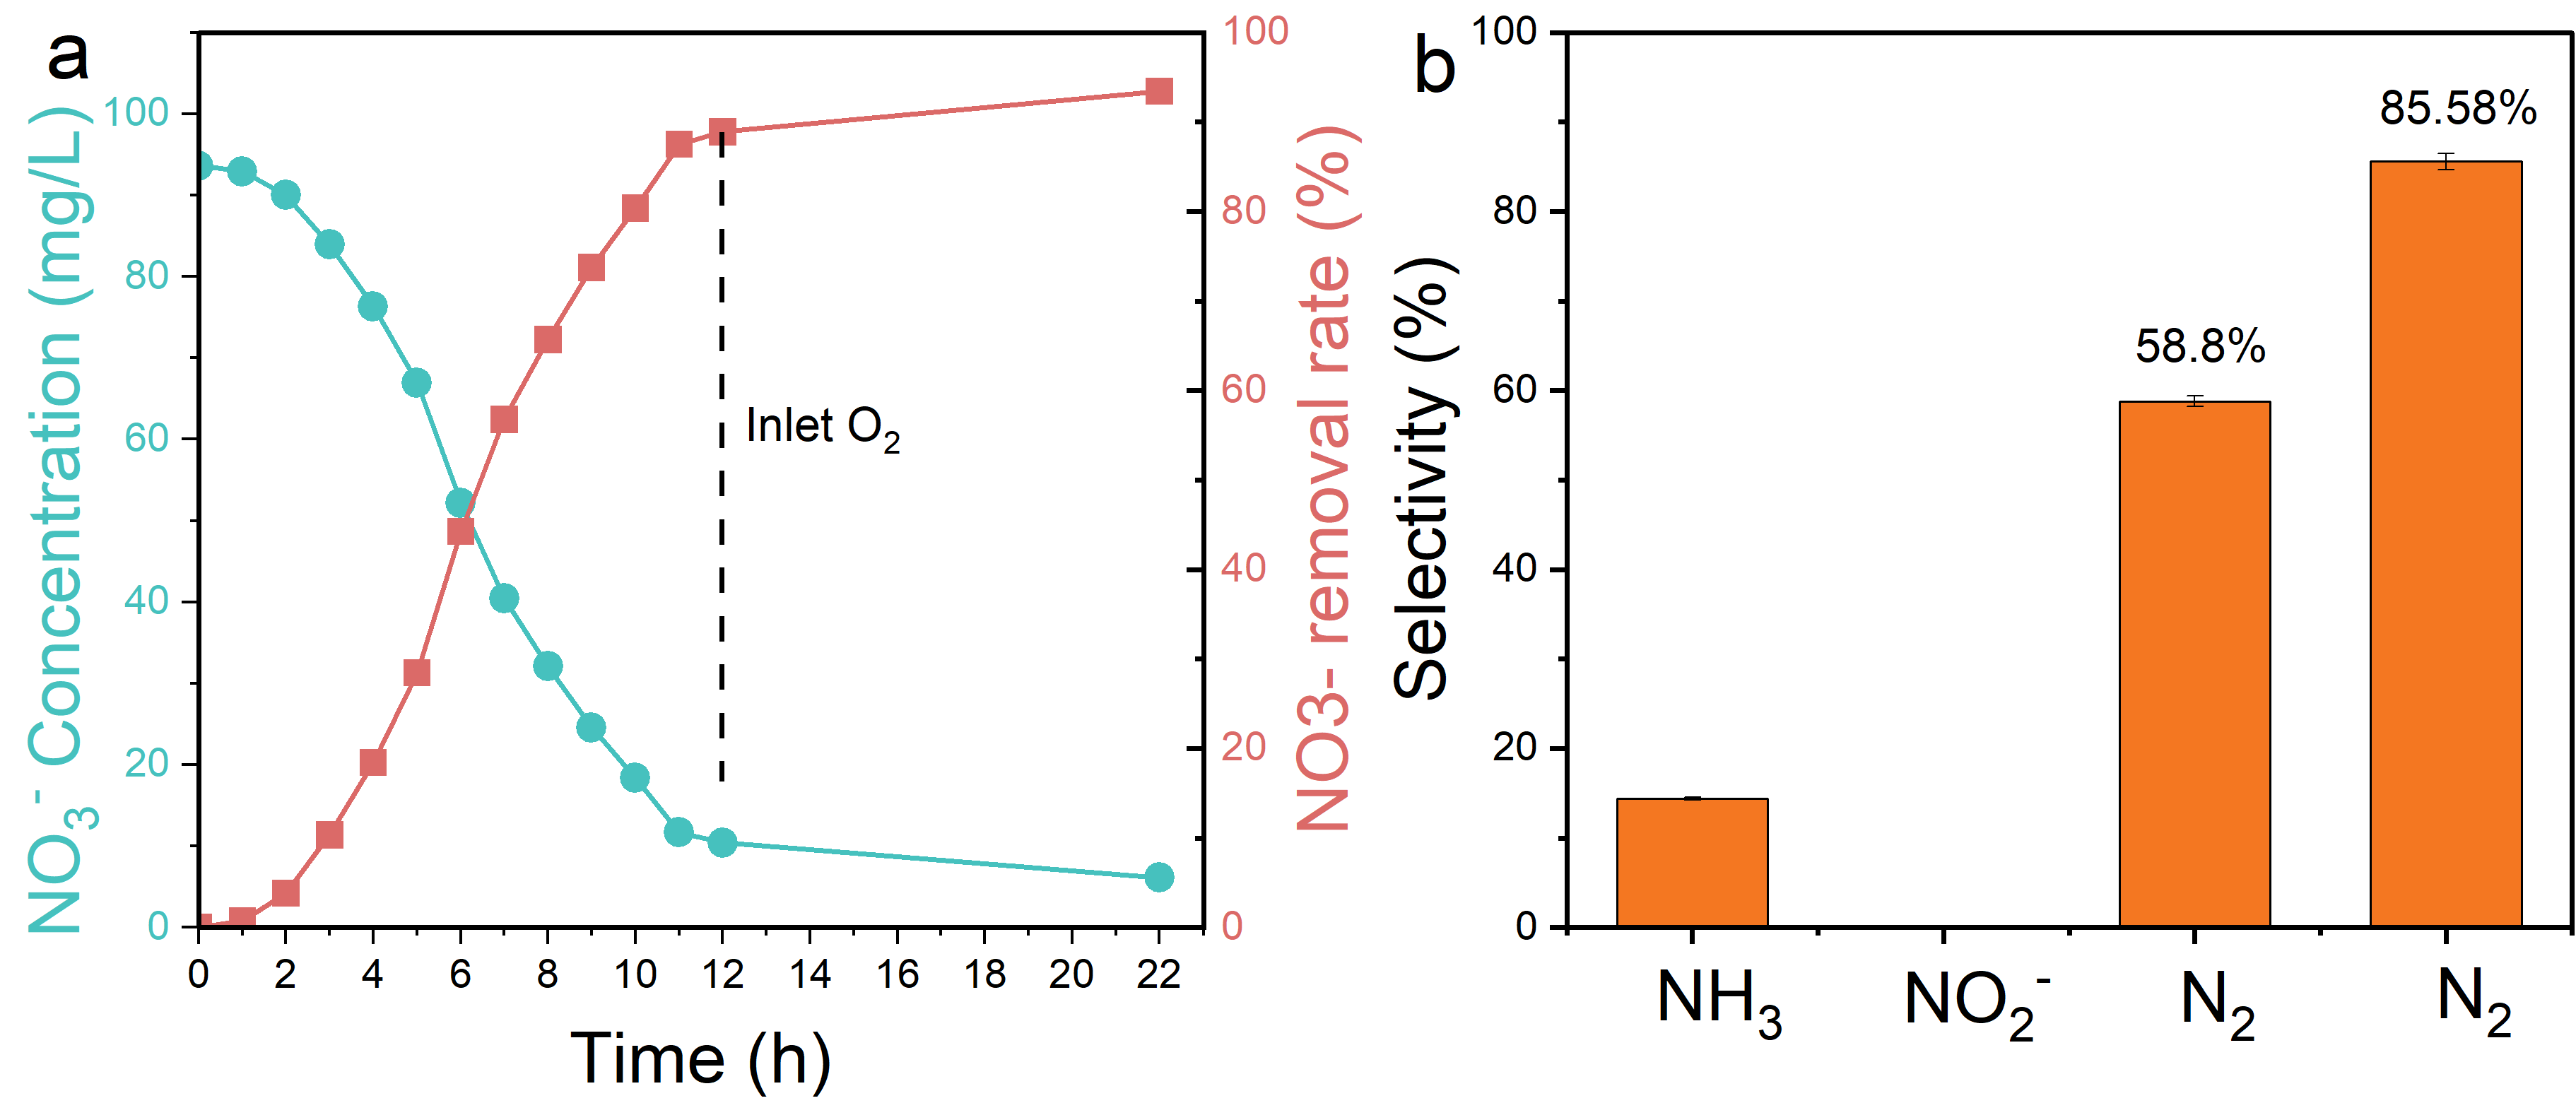


**Figure S22.** The removal rate of 100 mg L-1 NO3⁻ and the change of NO3⁻ concentration (a) and the selectivity of its products (b) After 12 h of NO3⁻ degradation, oxygen (O2) was introduced into the solution to convert the generated NH3 into N2, thereby enhancing the selectivity of N2.


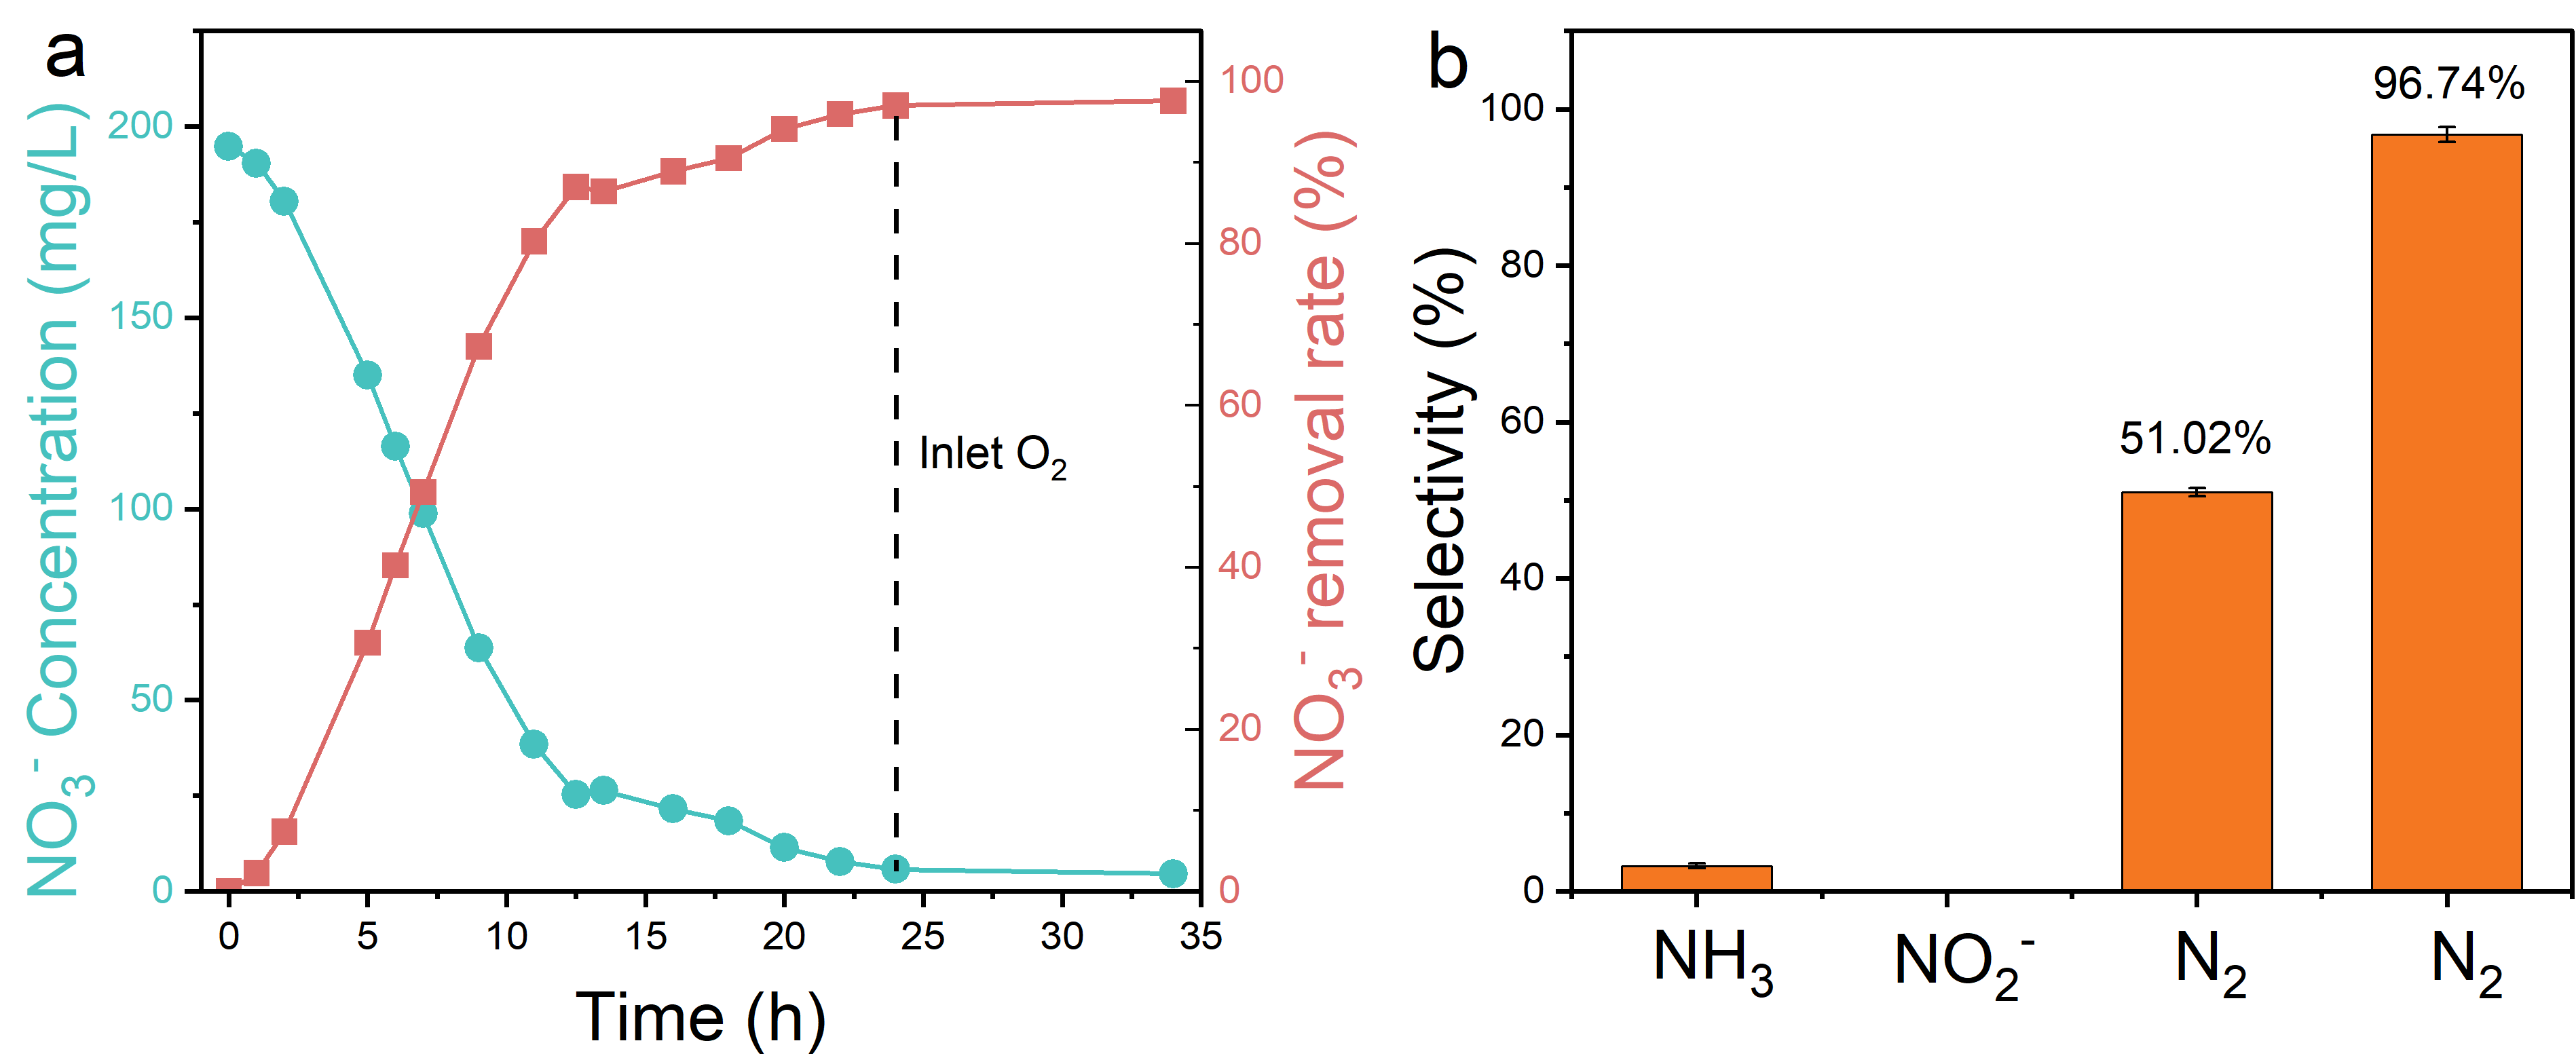


**Figure S23.** The removal rate of 200 mg/L NO3⁻ and the change of NO3⁻ concentration (a) and the selectivity of its products (b) After 24 h of NO3⁻ degradation, O2 was introduced into the solution to convert the generated NH3 into N2, thereby enhancing the selectivity of N2.


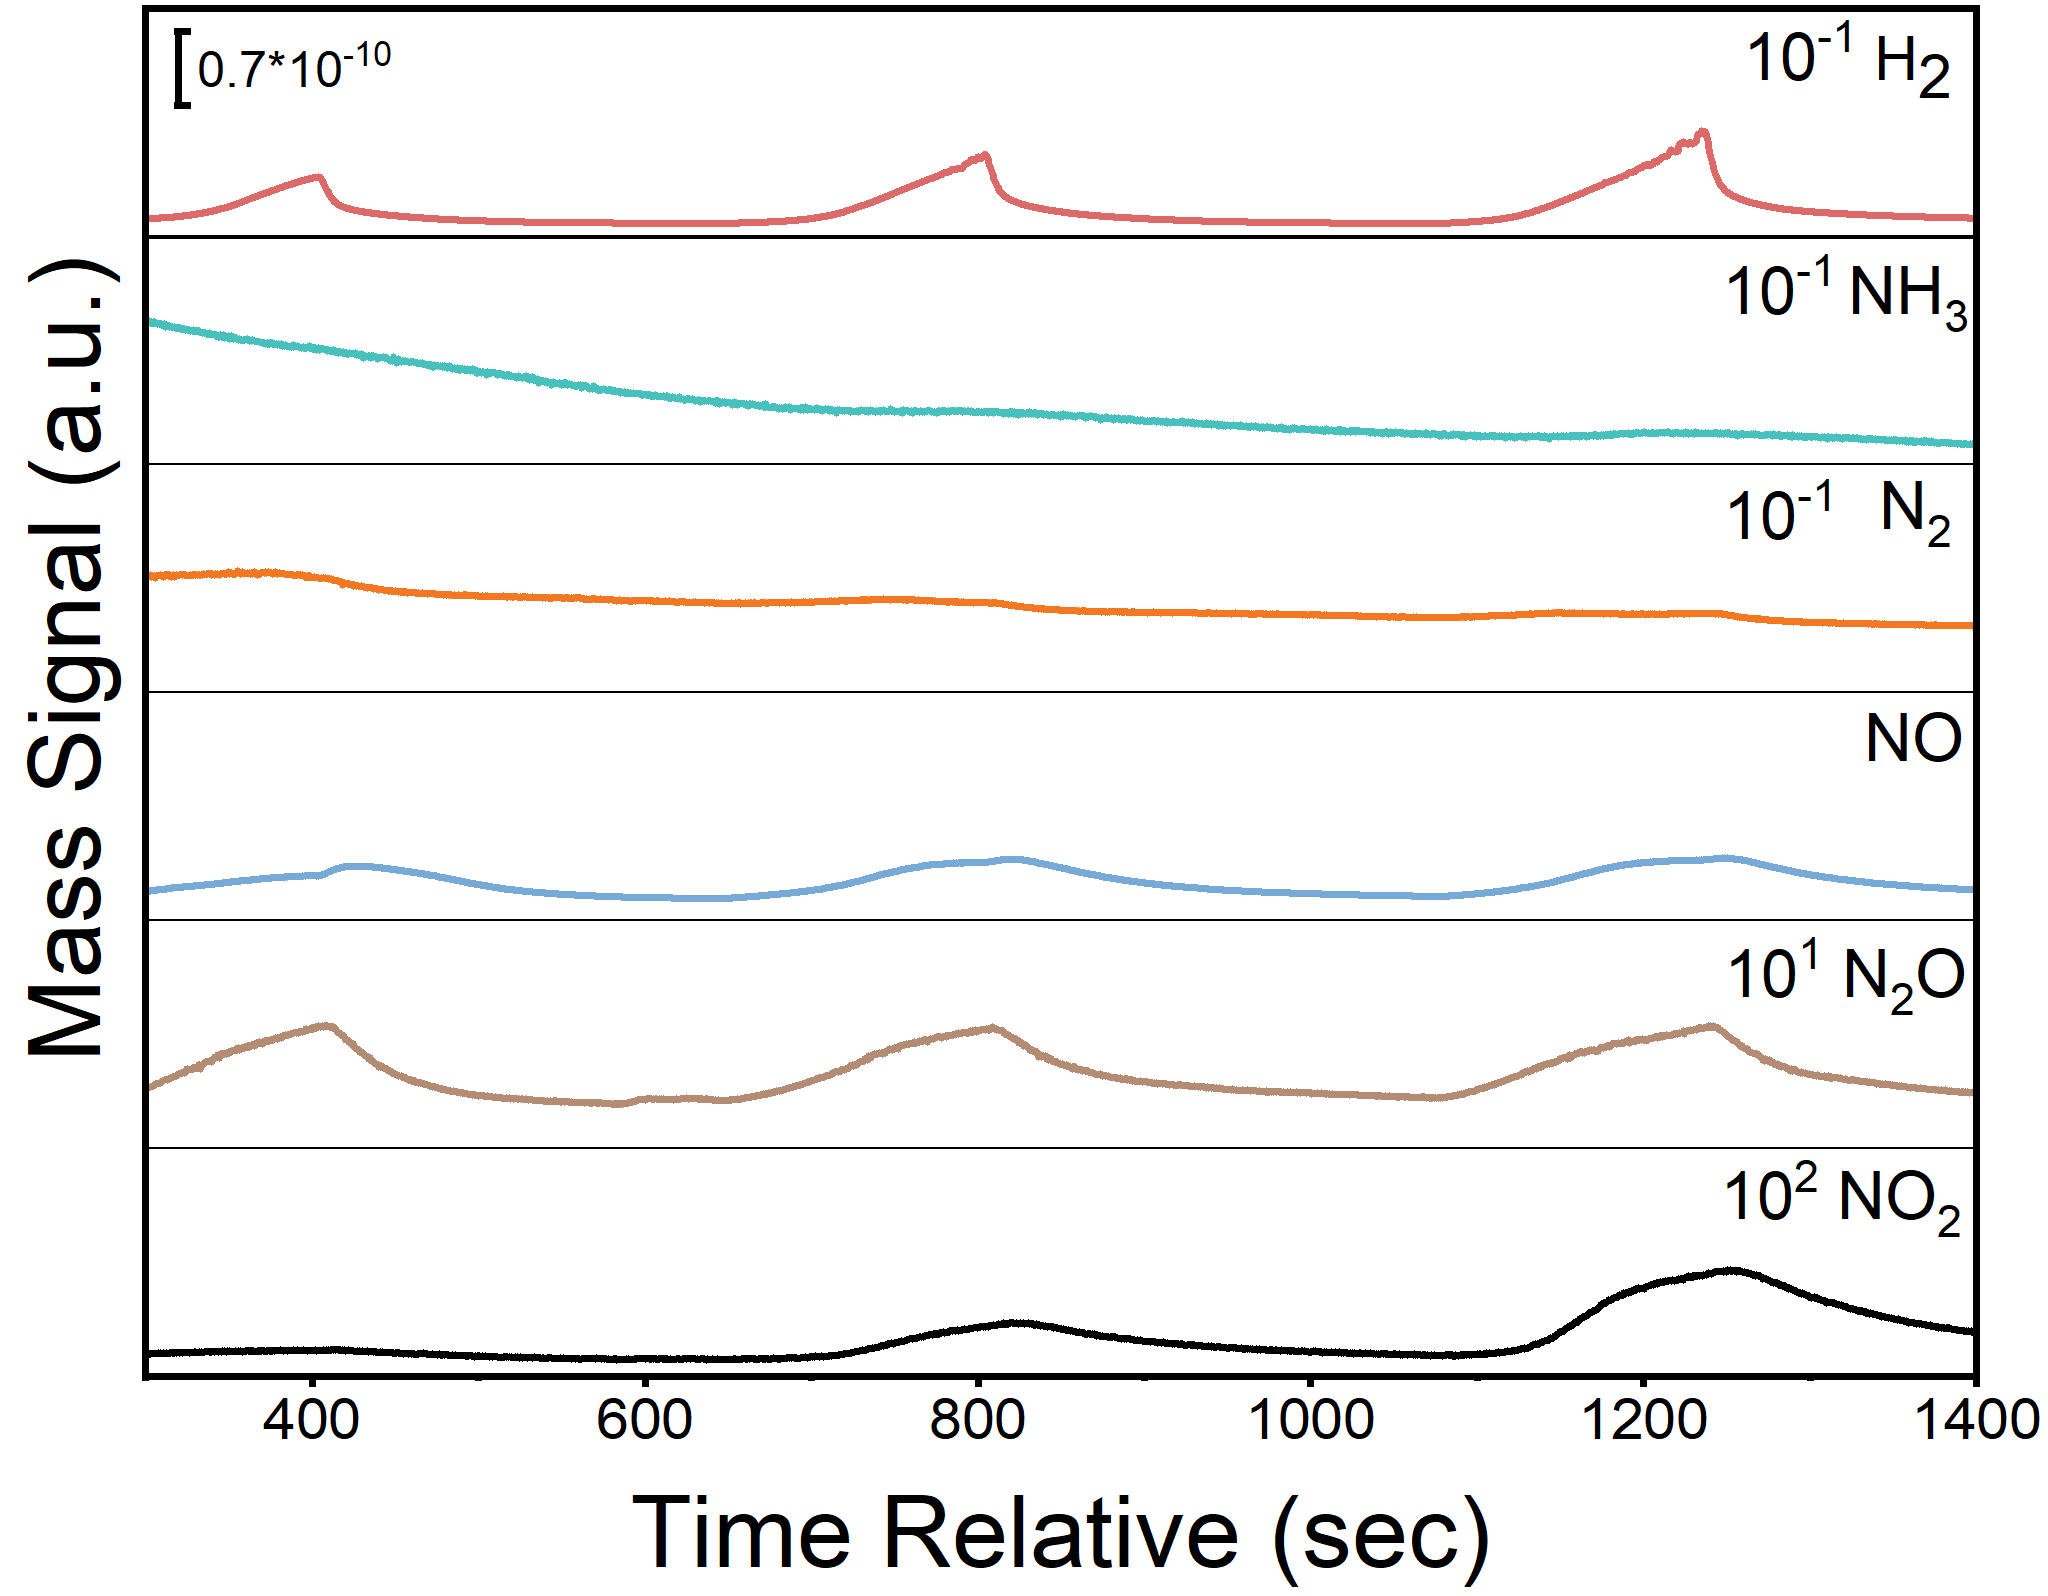


**Figure S24.** The DEMS test of OV-Cu-VO2 under Ar atmosphere. The test potential is -0.95 V (vs. RHE), and the testing time for each cycle is 200 seconds. The results showed no obvious N2 peak, indicating that no N2 was produced or only a very small amount of N2 was produced.


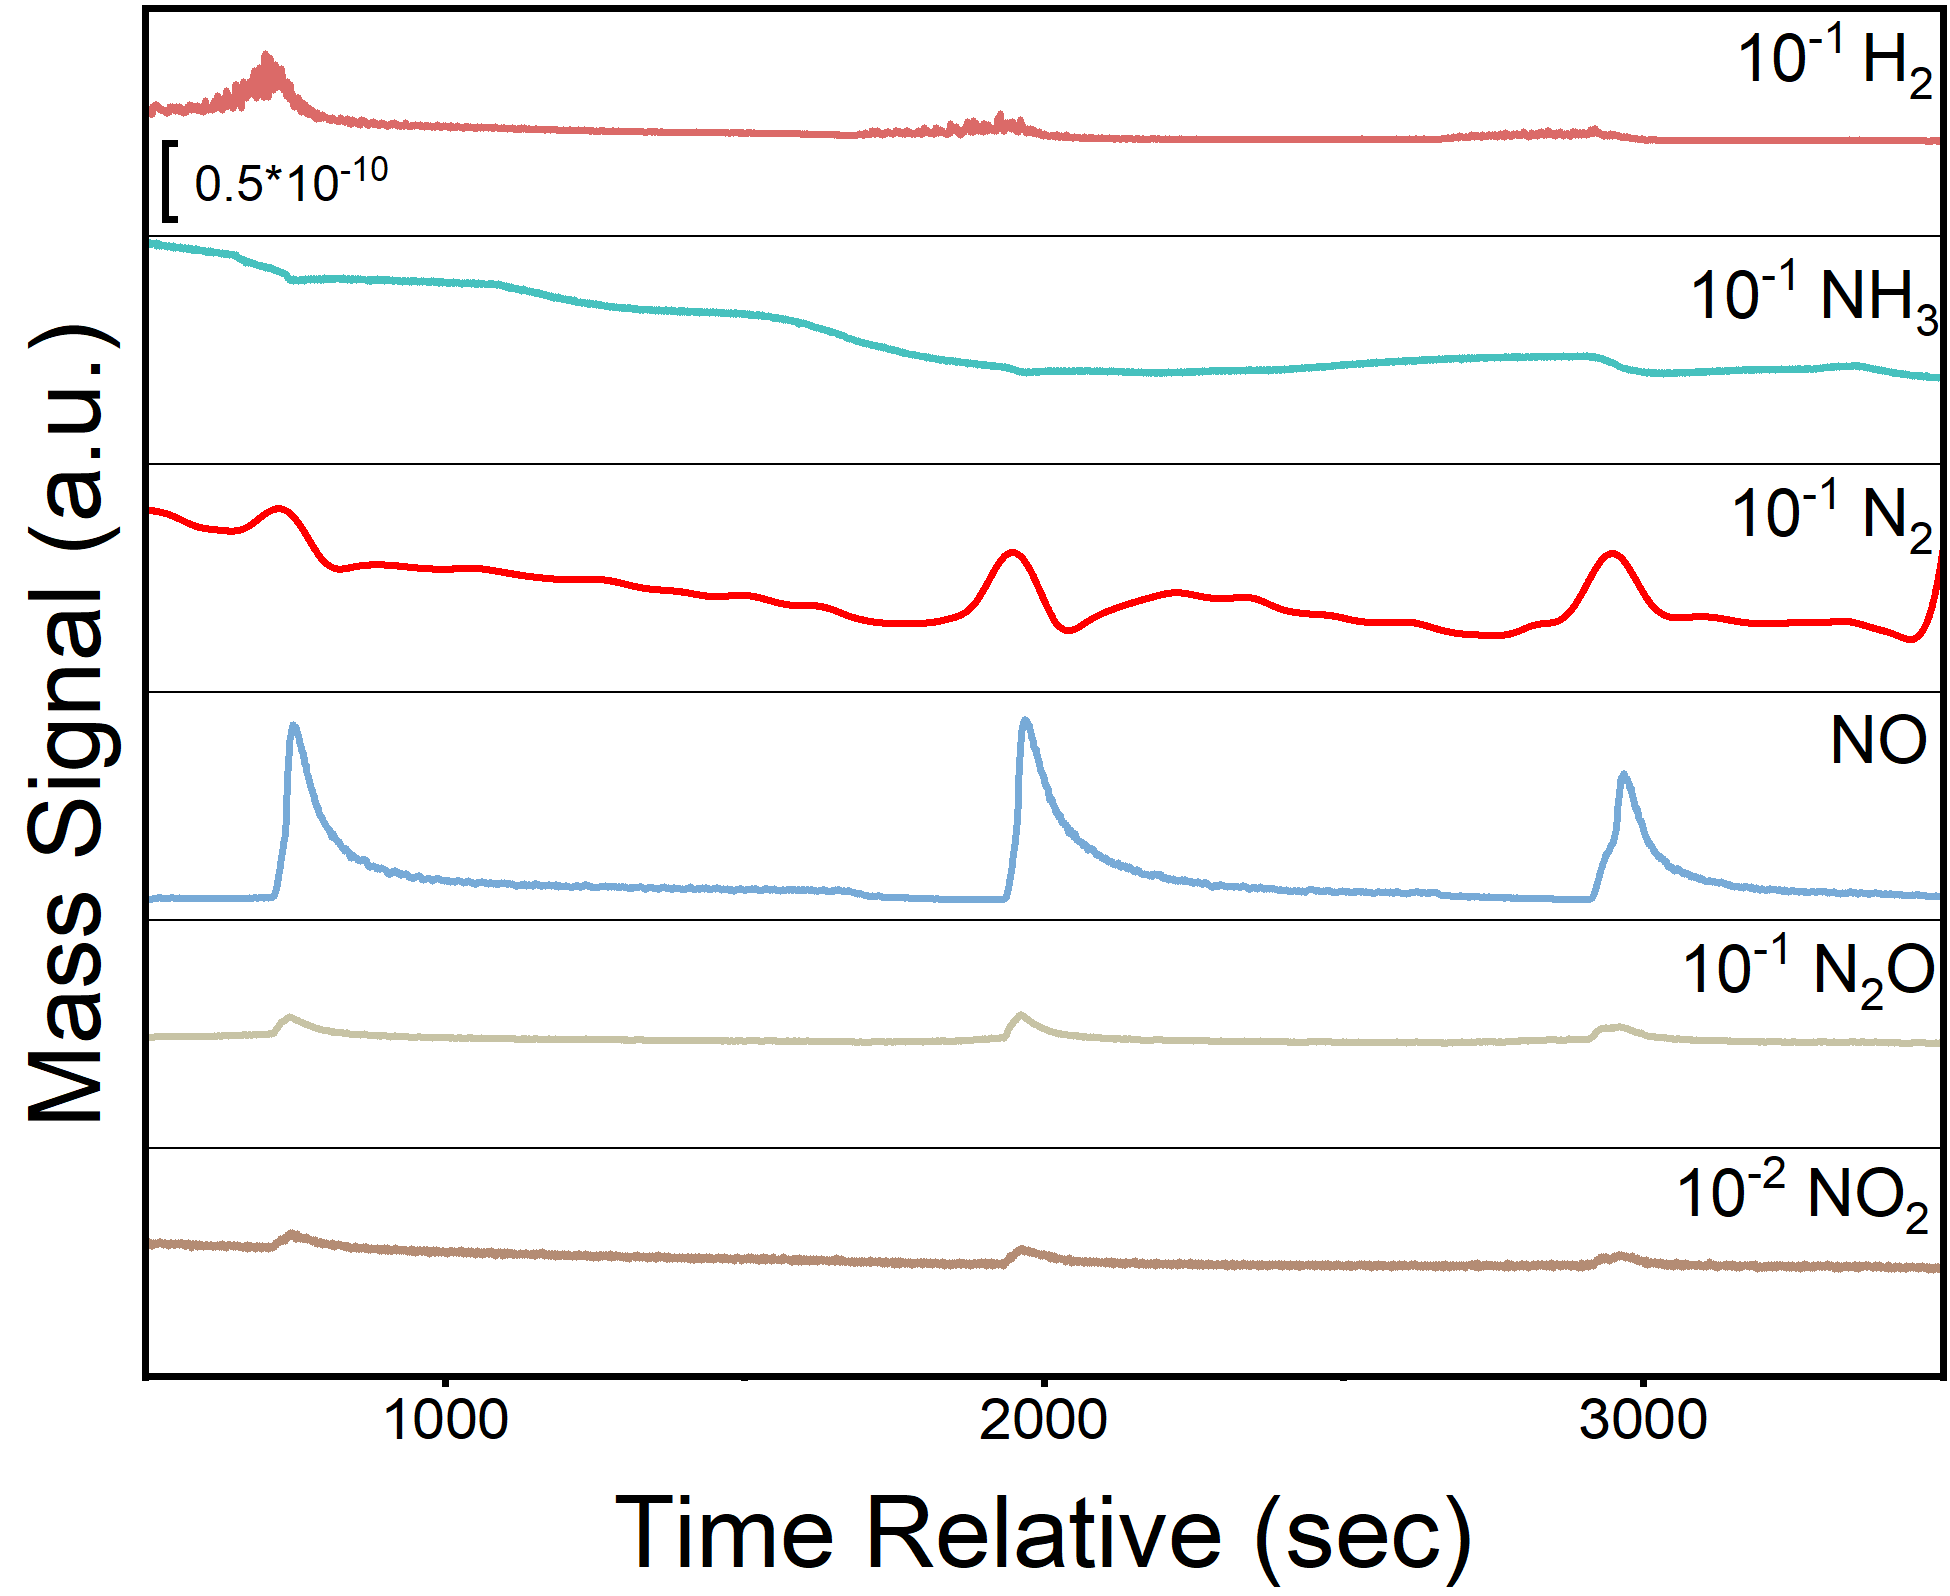


**Figure S25.** The DEMS test of OV-Cu-VO2 under O2/Ar atmosphere. The test potential is -0.95 V (vs. RHE), and the testing time for each cycle is 200 s. The results show a distinct N2 peak, indicating that N2 was produced during the reaction.


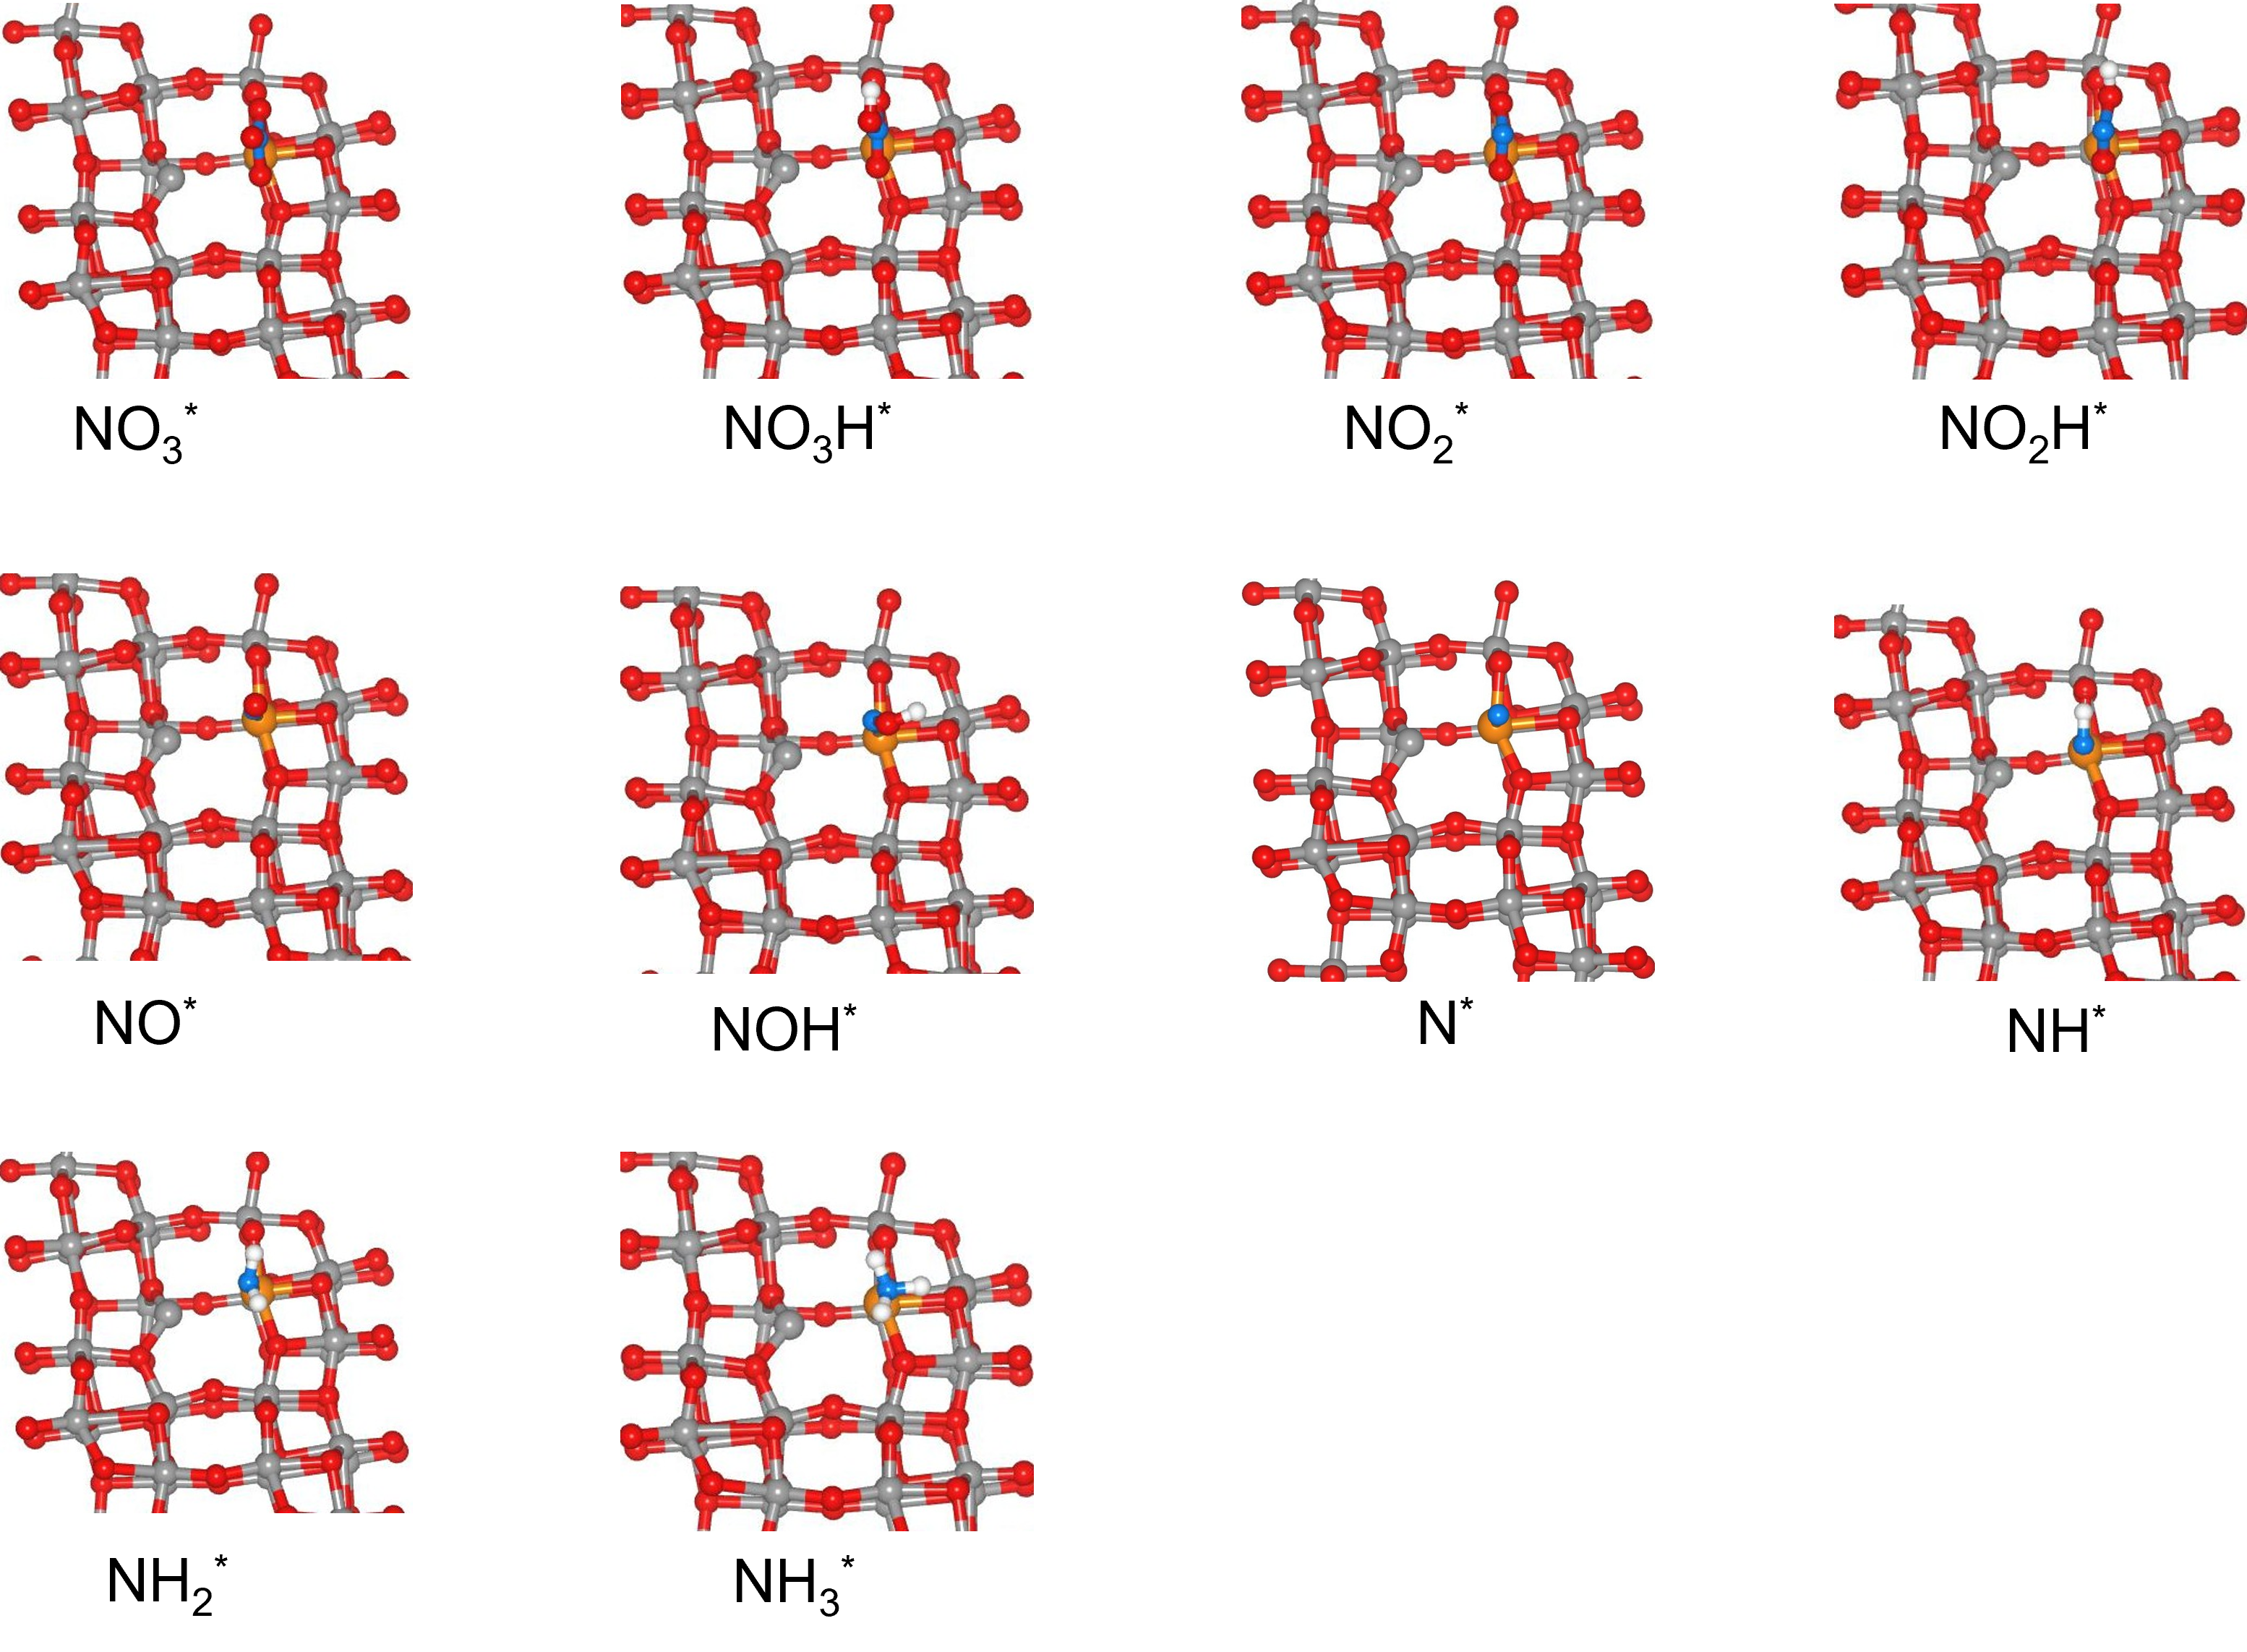


**Figure S26.** The intermediate model of the pathway for the reduction of NO3⁻ to NH3 under the condition of no O refilling. Spheres: red = O, grey = V, orange =Cu, blue = N, white = H.


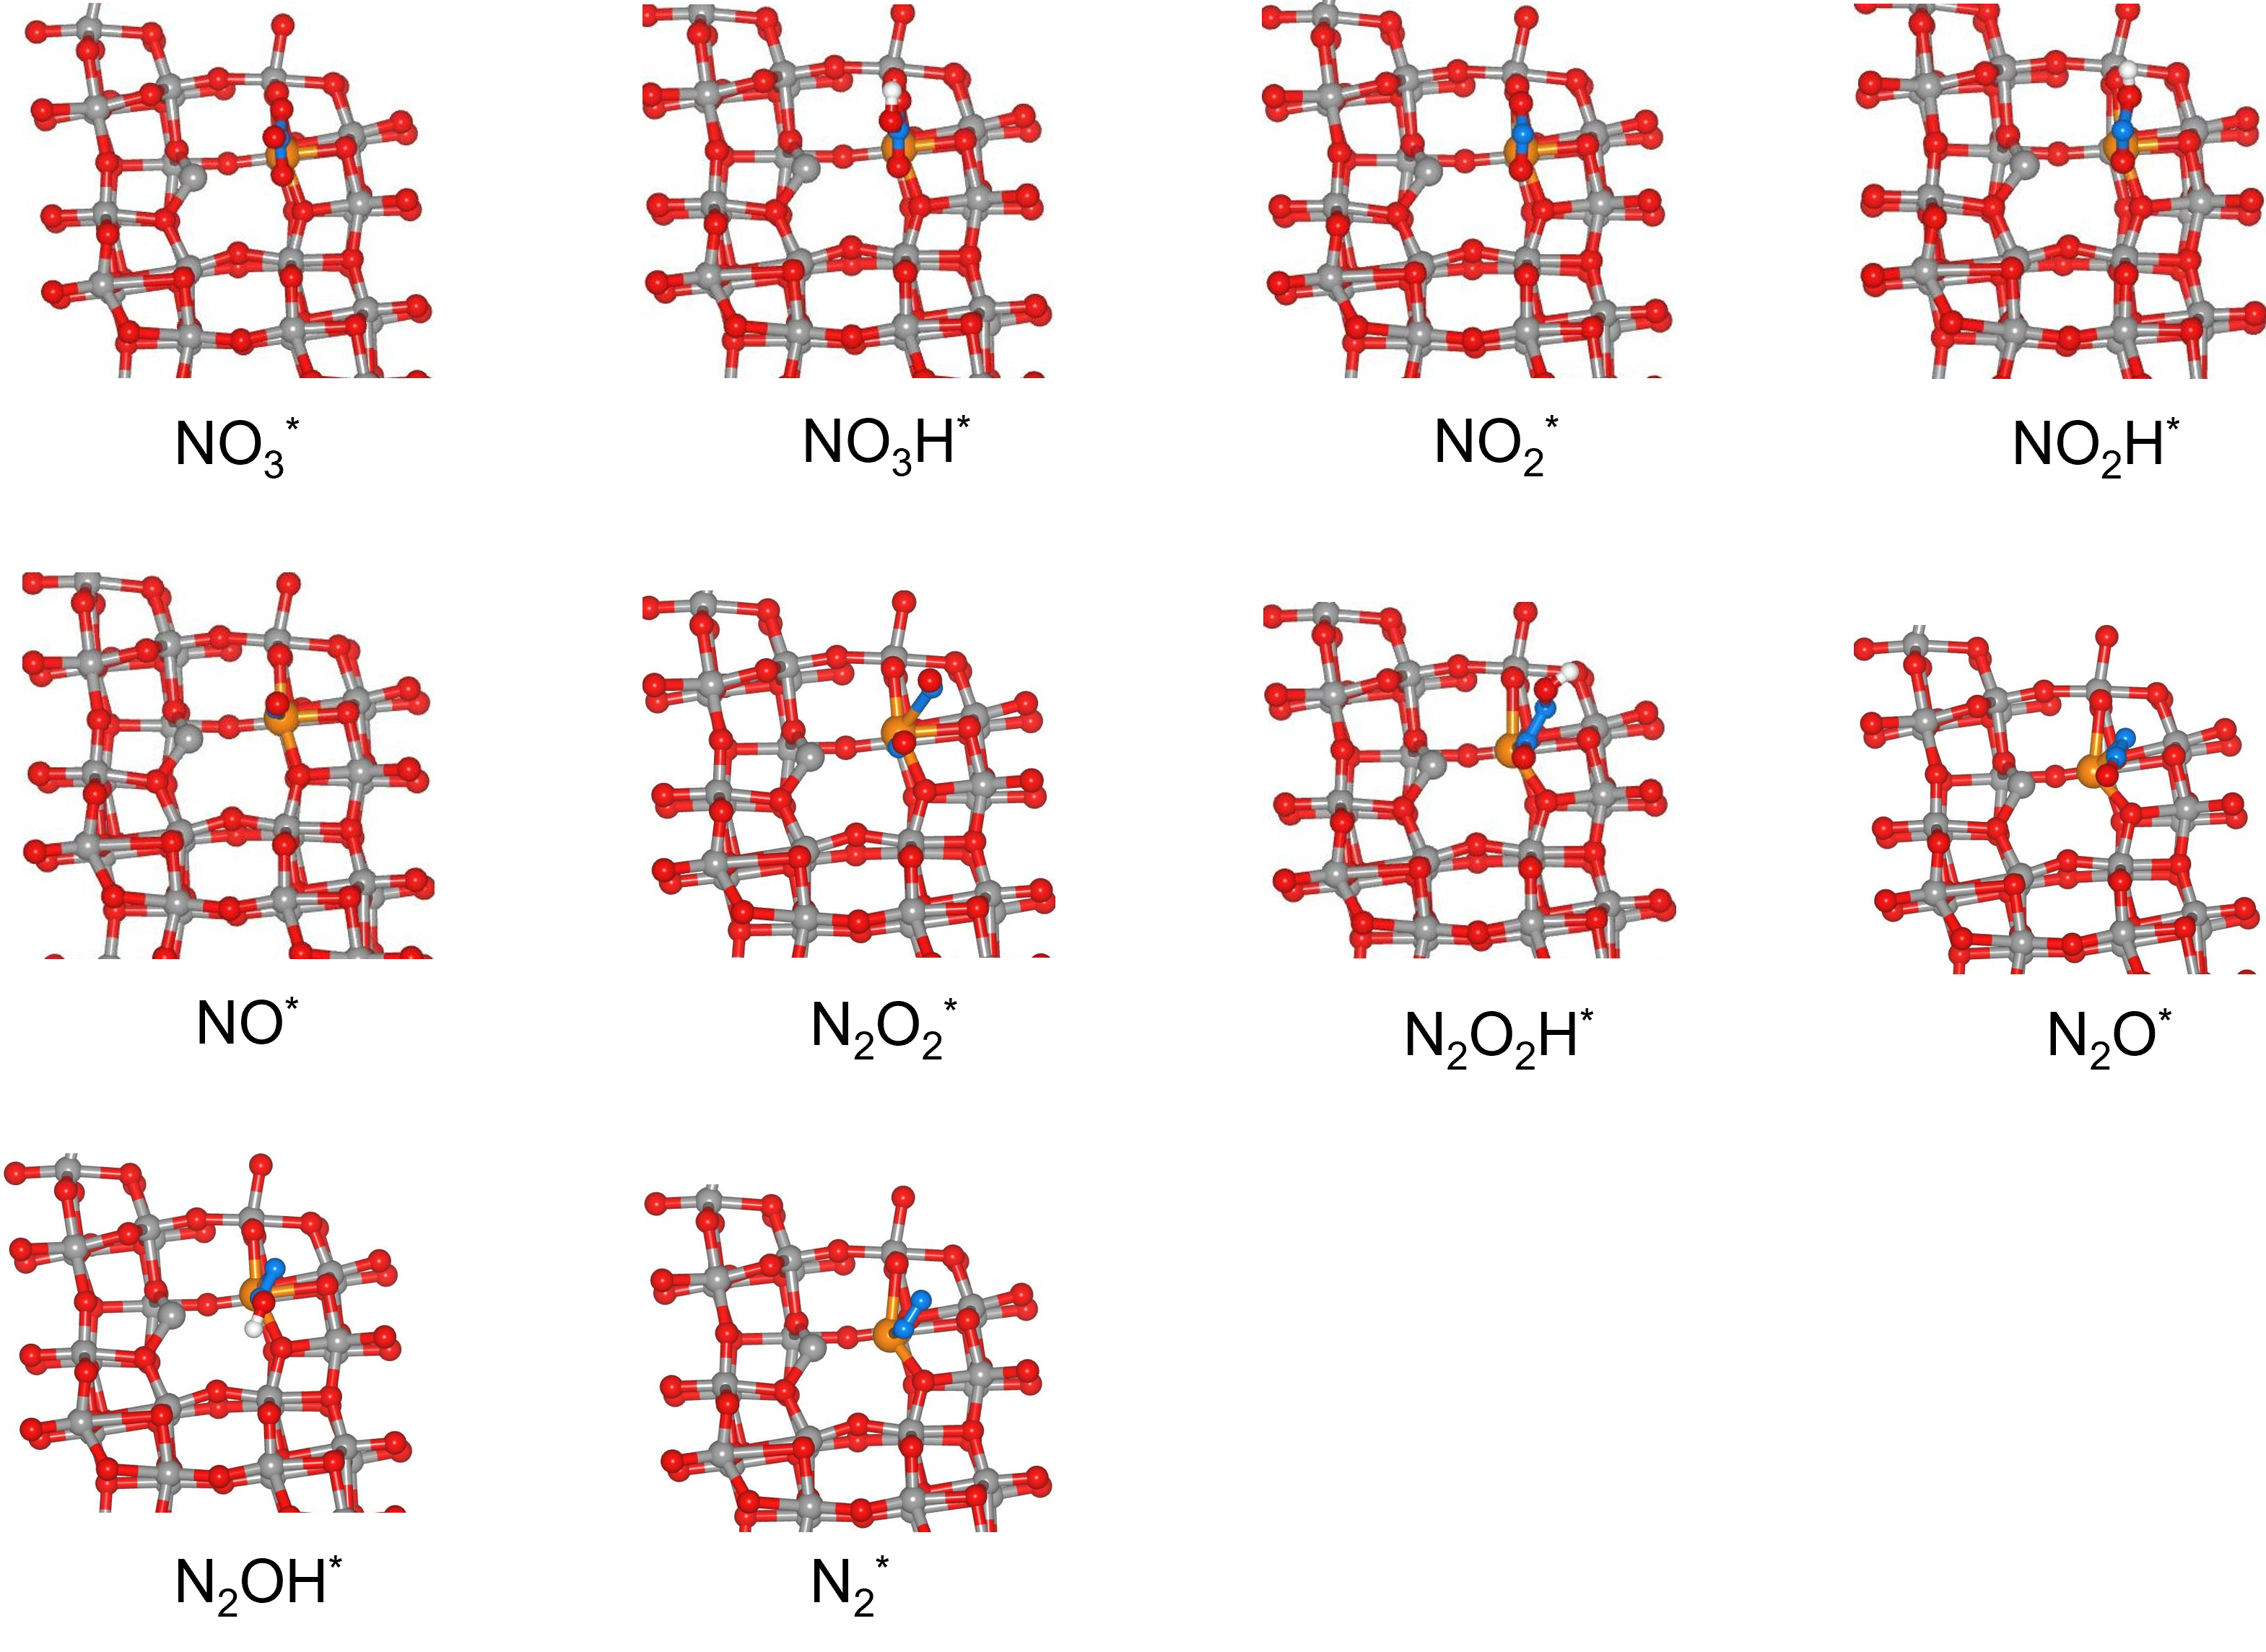


**Figure S27.** The intermediate model of the pathway for the reduction of NO3⁻ to N2 under the condition of no O refilling. Spheres: red = O, grey = V, orange =Cu, blue = N, white = H.

**
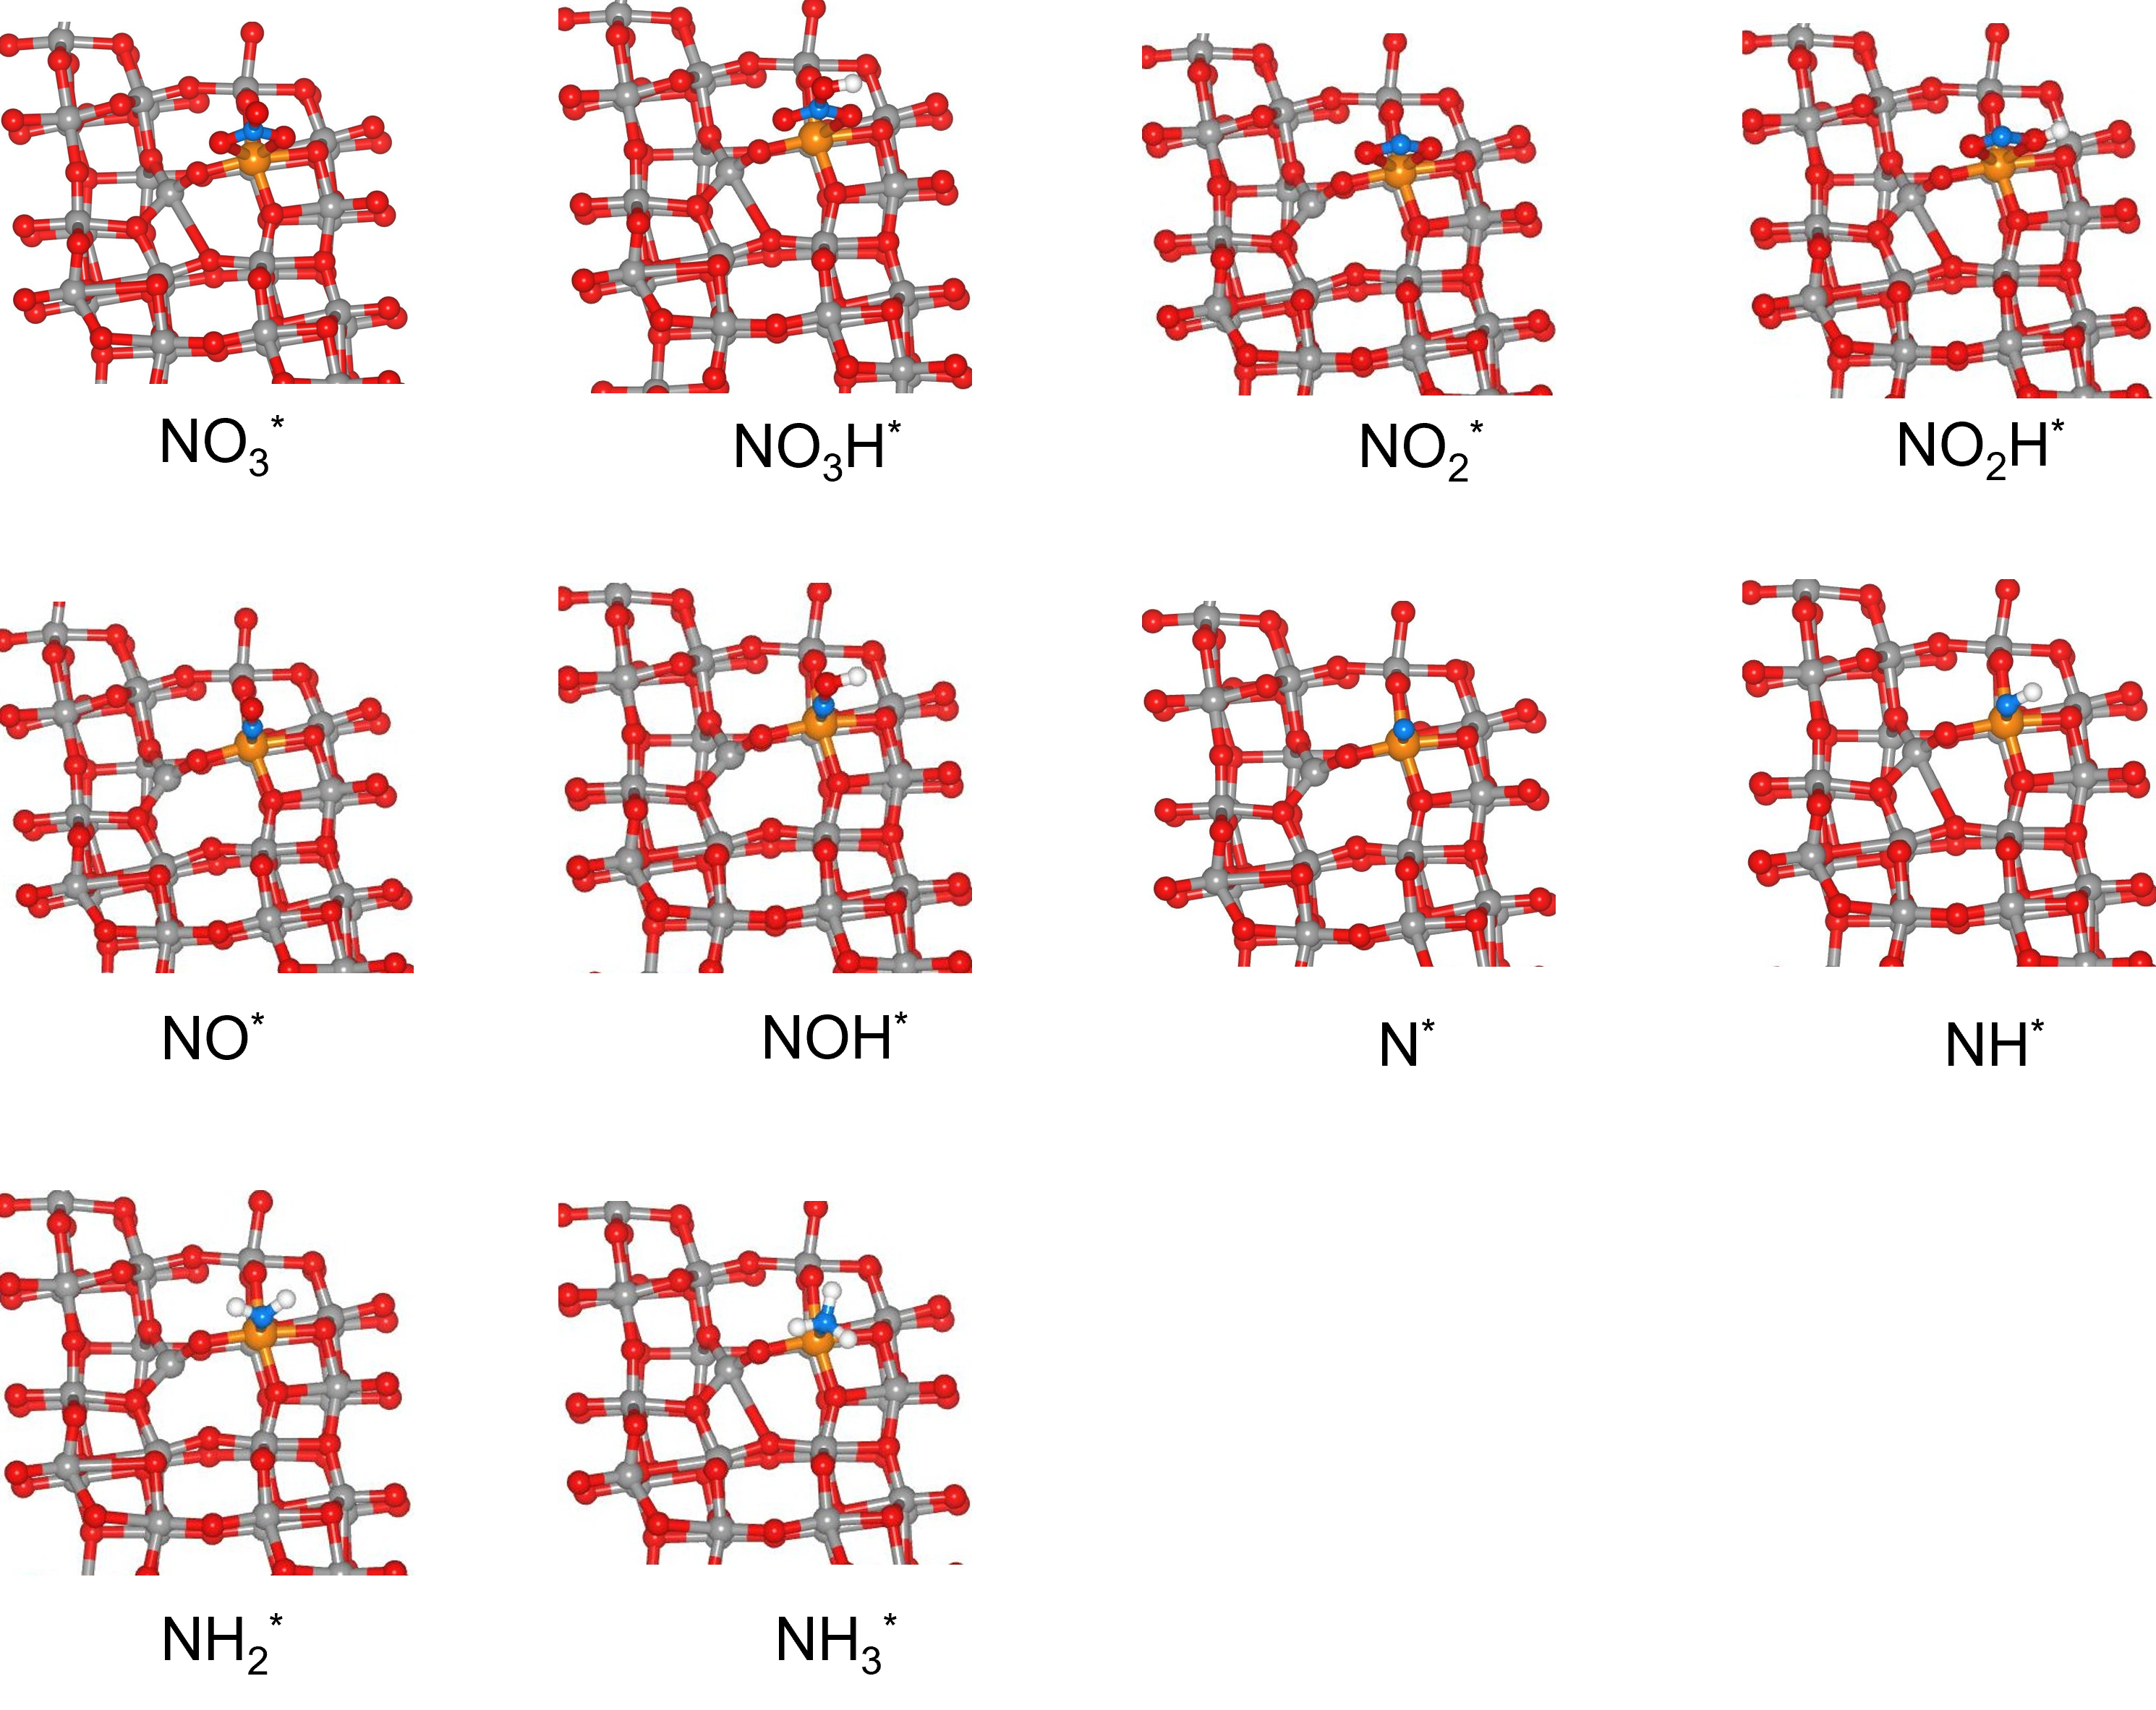
**

**Figure S28.** There is an intermediate model for the pathway of NO3⁻ being reduced to NH3 under the condition of O refilling. Spheres: red = O, grey = V, orange =Cu, blue = N, white = H.


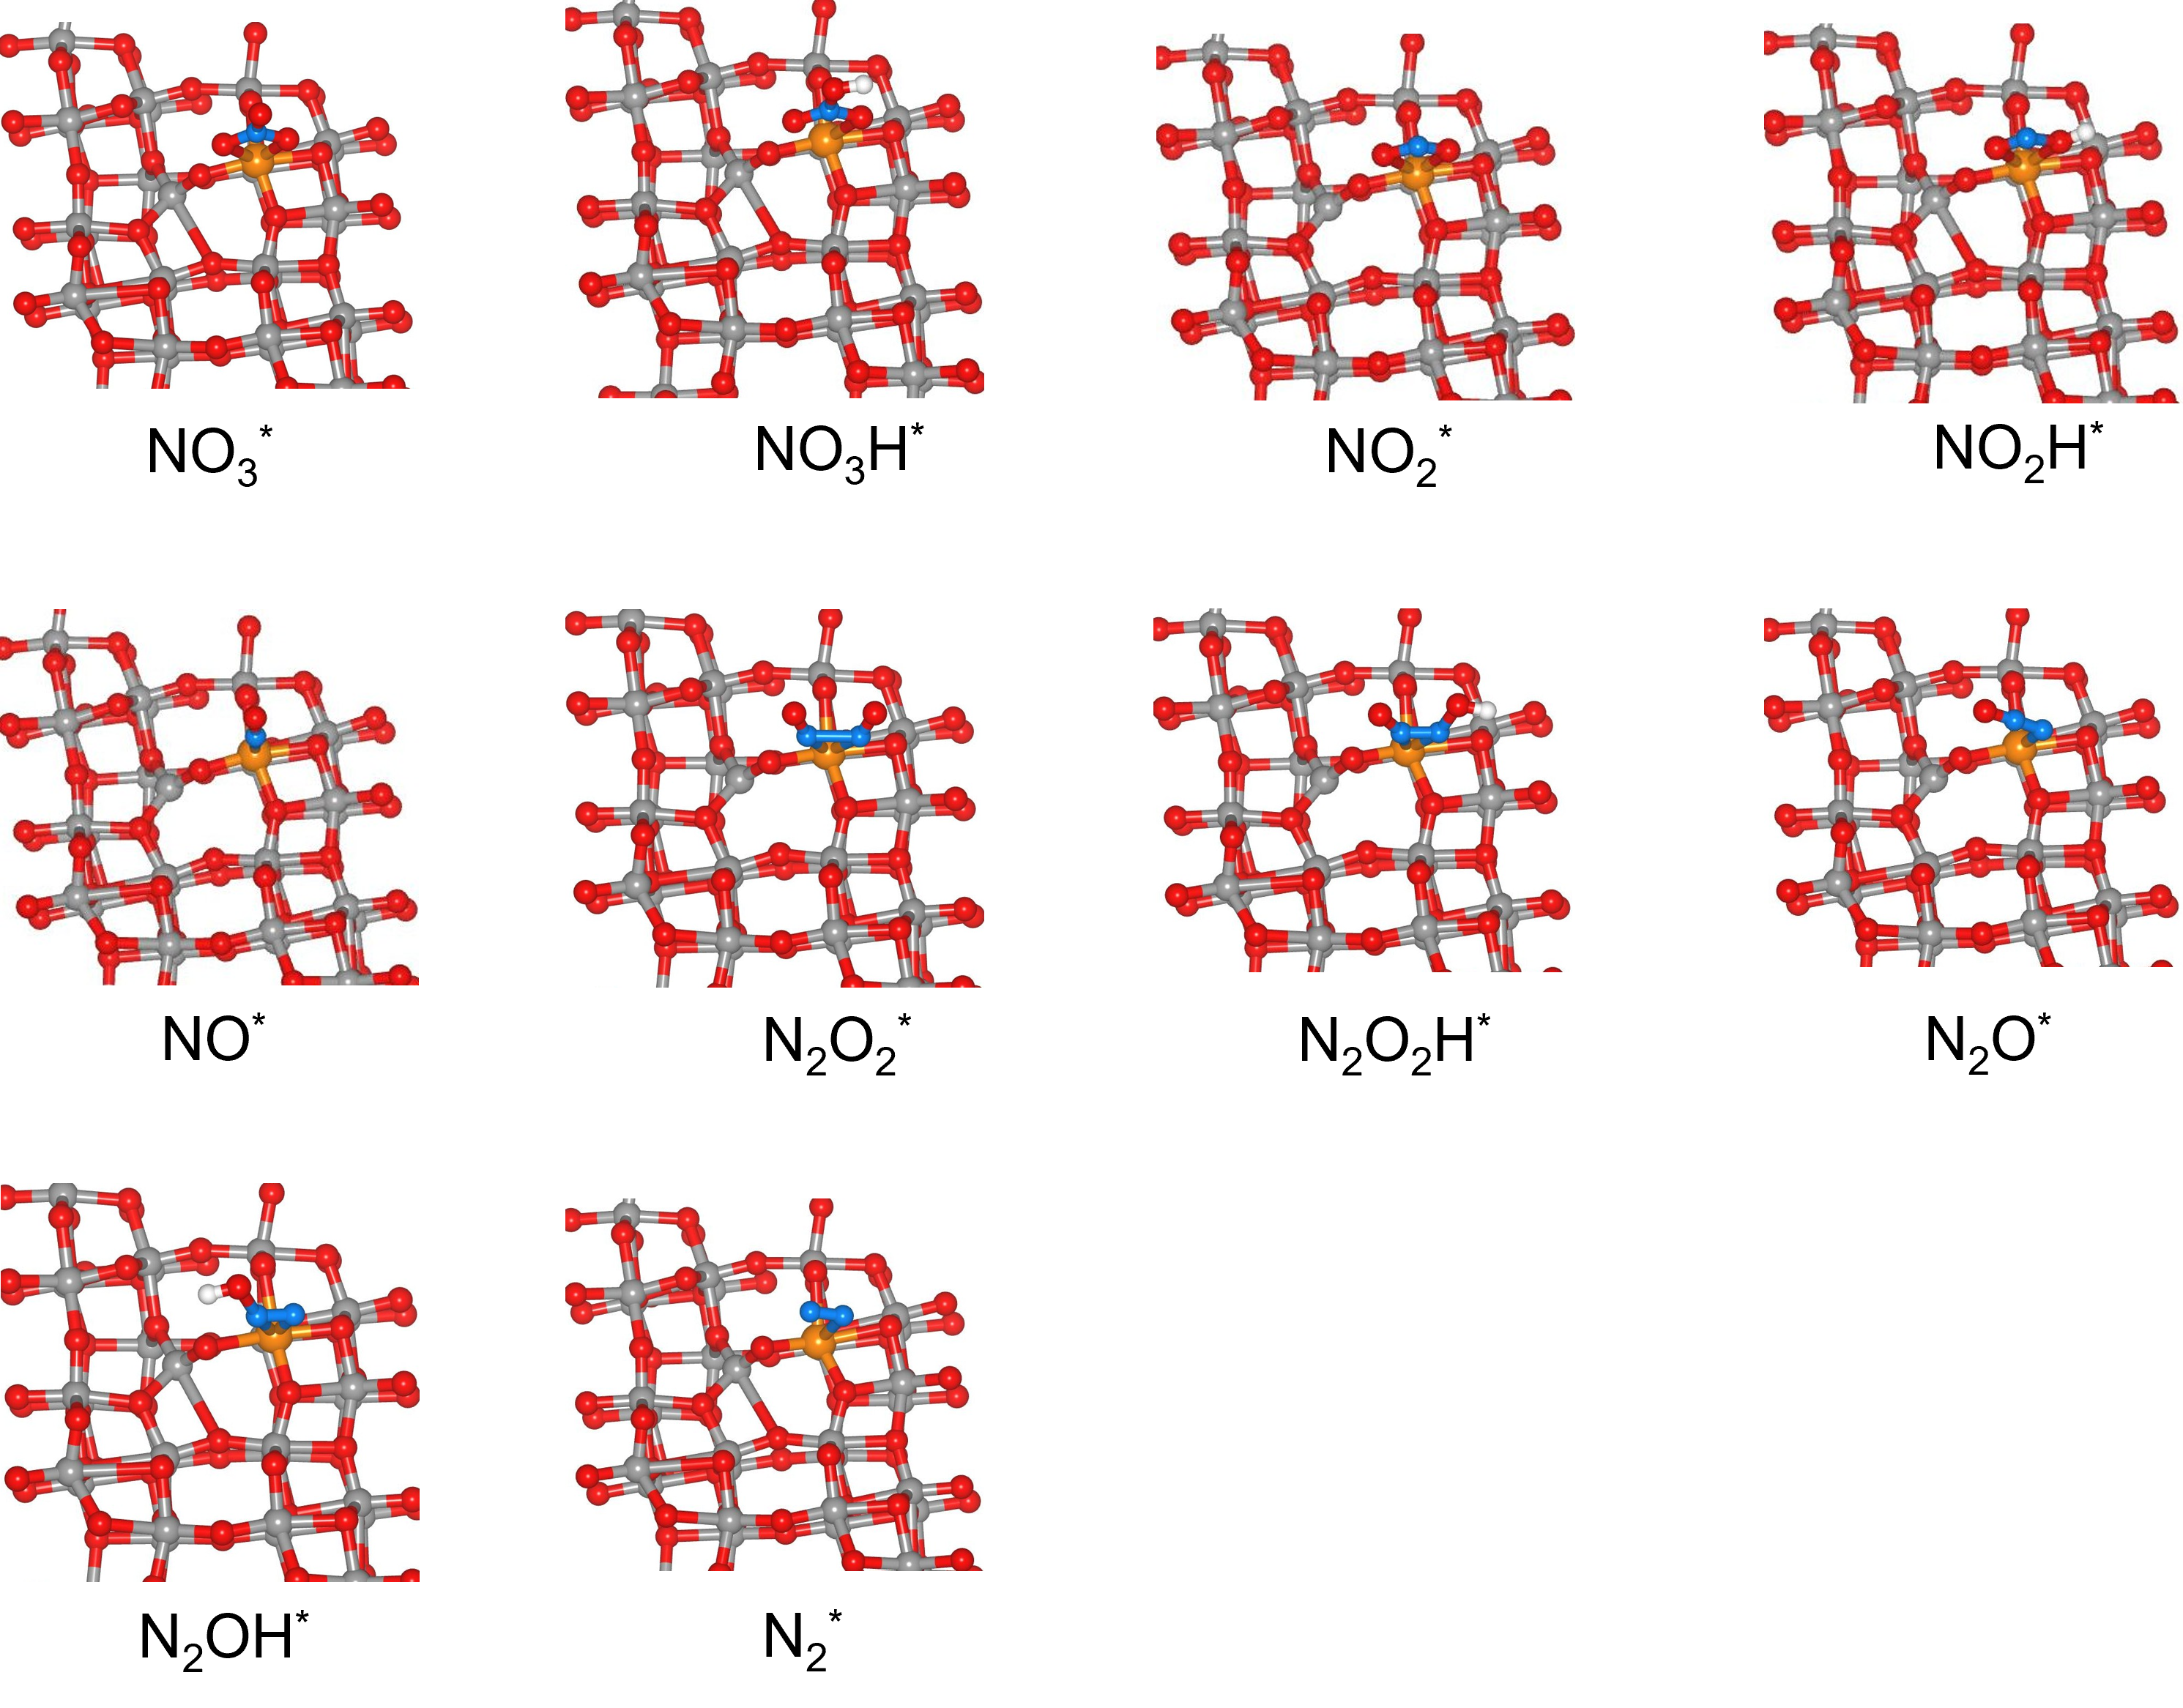


**Figure S29.** There is an intermediate model for the pathway of NO3⁻ being reduced to N2 under the condition of O refilling. Spheres: red = O, grey = V, orange =Cu, blue = N, white = H.


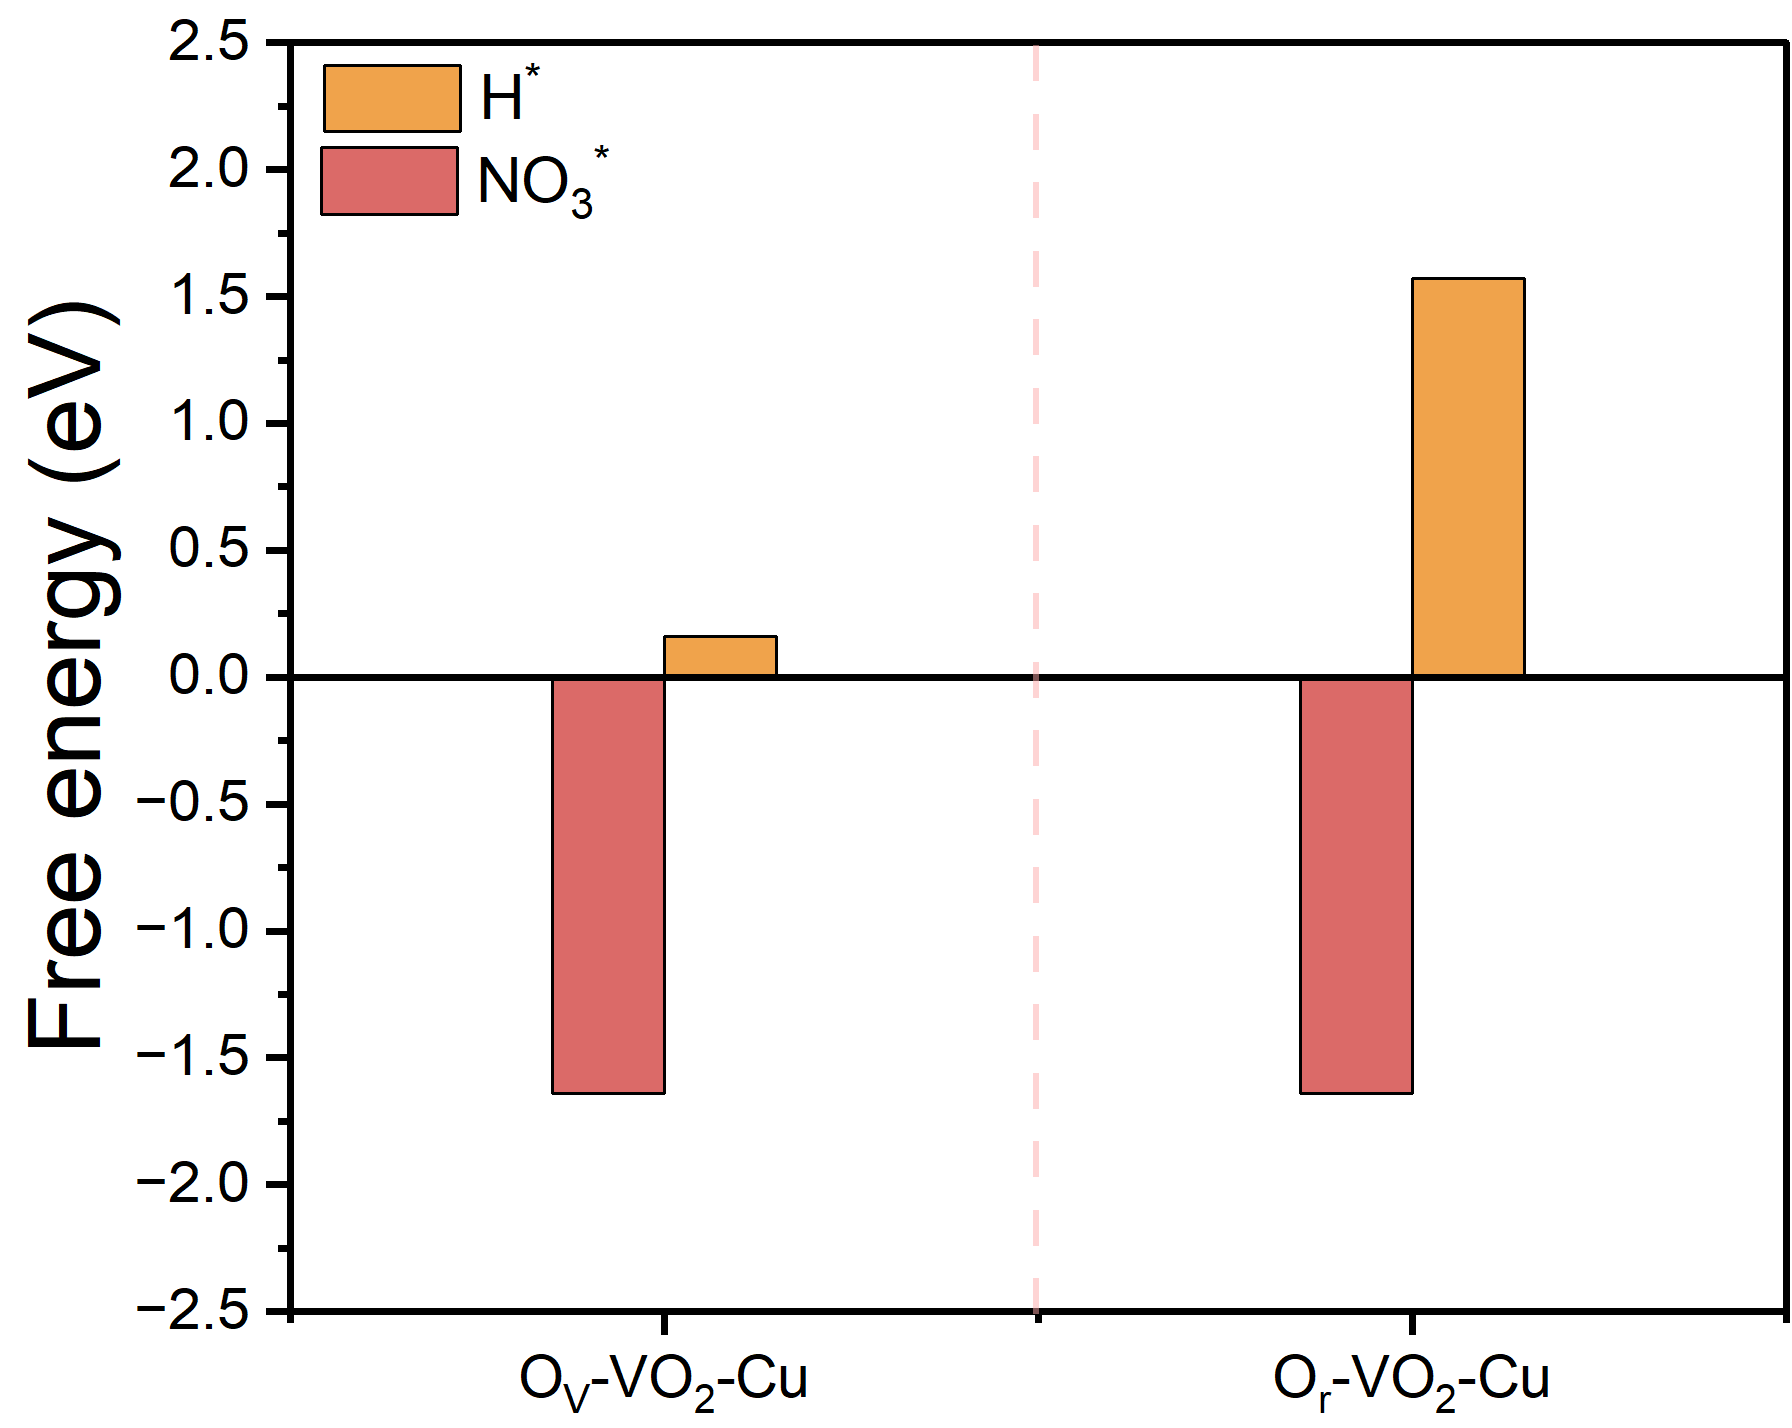


**Figure S30.** Comparison of adsorption energy between NO3* and H*.

**Tables**

**Table1.** ICP results of OV-Cu-VO2.

| Constant volume V0 (mL) | Test element | Test solution element concentration Co (mg/L) | Dilution ratio  f | Element concentration in the original solution of digestion solution C1 (mg/L) | Sample element content Cx (mg/kg) | Sample element content C (mg/kg) | Sample element content  W (%) |
| --- | --- | --- | --- | --- | --- | --- | --- |
| 25 | V | 1.0670724 | 1000 | 1067.072 | 588892.053 | 607199.573 | 60.72% |
| 1.1116607 | 1111.661 | 613499.283 |
| 1.1220037 | 1122.004 | 619207.384 |
| 25 | Cu | 1.7022065 | 10 | 17.022 | 9394.076 | 9420.756 | 0.94% |
| 1.7059609 | 17.060 | 9414.795 |
| 1.7129555 | 17.130 | 9453.397 |

**Table2.** EXAFS data fitting results of Samples.

| Sample | Path | *CNa* | *R*(Å)*b* | *σ*2 (Å2)*c* | Δ*E*0(eV)*d* | Range of k | Range of R | *R* factor |
| --- | --- | --- | --- | --- | --- | --- | --- | --- |
| Cu K-edge (*Ѕ*02=0.905) | | | | | | | | |
| Cu foil | Cu-Cu | 12.0* | 2.540 | 0.0086 | 4.4 | 2.0-13.0 | 1.0-3.0 | 0.0020 |
| Cu2O | Cu-O | 2.0 | 1.863 | 0.0045 | 6.1 | 2.0-13.0 | 1.0-3.3 | 0.0118 |
| Cu-Cu | 12.0 | 3.018 | 0.0244 |
| Cu-O | 6.0 | 3.451 | 0.0102 |
| CuO | Cu-O | 4.0 | 1.956 | 0.0037 | 0.1 | 2.0-13.0 | 1.0-3.2 | 0.0104 |
| Cu-Cu | 4.0 | 2.917 | 0.0061 | 3.9 |
| Cu-Cu | 6.0 | 3.110 | 0.0087 |
| OV-Cu-VO2 | Cu-O | 3.4 | 1.942 | 0.0050 | -4.5 | 2.0-10.3 | 1.0-3.3 | 0.0107 |
| Cu-V | 3.6 | 3.295 | 0.0253 | 6.5 |

**Table3.** Comparison with other works.

| Catalyst | pH | Concentration of NO3- | NO3- removal rate | N2  selectivity  (%) | Precious metal or not | Cl- or not | Ref |
| --- | --- | --- | --- | --- | --- | --- | --- |
| OV-Cu-VO2 | 1 | 100 mg/L | 97.64% | 94.32% | No | No | This work |
| 0.1 M | 7.33% (1h) | 81.92% |
| FesAs/g-C3N4 | 7 | 50 mg/L | 71.6% | 97.9% | No | Yes | 1 |
| Fe3Ni-N-C | 7 | 100 mg/L | 86.6% | 89.9% | No | Yes | 2 |
| FeCo-NPCNFs | 7 | 100 mg/L | 78.25% | 85% | No | Yes | 3 |
| Pd-Cu/GS | 6 | 100 mg/L | 88% | 97.3% | Yes | No | 4 |
| CNTs@mesoC@CuPd | 7 | 100 mg/L | 95% | 98% | Yes | No | 5 |
| FeOOH@CC-160 | 7 | 100 mg/L | 88.51% | 80.12% | No | Yes | 6 |
| Fe/NFs | 7 | 100 mg/L | 80.4% | 97.2% | No | Yes | 7 |
| RL-Fe2N@NC | 7 | 100 mg/L | 86% | 96% | No | Yes | 8 |
| FeSx@FF | ≥7 | 350 mg/L | 90.75% | 98.88% | No | Yes | 9 |
| Co3O4-TiO2/Ti | 7 | 50 mg/L | 60% | 71% | No | Yes | 10 |
| FeN-NC-140 | 7 | 100 mg/L | 6004 mg N/g Fe | 91% | No | Yes | 11 |
| Cu2O/Cu NRs/CF | 7 | 30 mg/L | 91.32% | 96.81% | No | Yes | 12 |
| Co/Co3O4-meso-C | 7 | 100 mg/L | 90.77% | 99% | No | Yes | 13 |

References

1. Song Q*, et al.* Anchored Fe atoms for N O bond activation to boost electrocatalytic nitrate reduction at low concentrations. *Appl. Catal. B-Environ.* **317**, 121721 (2022).

2. Sun J, Gao W, Fei H, Zhao G. Efficient and selective electrochemical reduction of nitrate to N2 by relay catalytic effects of Fe-Ni bimetallic sites on MOF-derived structure. *Appl. Catal. B-Environ.* **301**, 120829 (2022).

3. Luo H*, et al.* Relay Catalysis of Fe and Co with Multi‐Active Sites for Specialized Division of Labor in Electrocatalytic Nitrate Reduction Reaction. *Adv. Funct. Mater.* **34**, 2403838 (2024).

4. Al Bahri M, Calvo L, Gilarranz MA, Rodriguez JJ, Epron F. Activated carbon supported metal catalysts for reduction of nitrate in water with high selectivity towards N2. *Appl. Catal. B-Environ.* **138-139**, 141-148 (2013).

5. Xu H, Chen J, Zhang Z, Hung CT, Yang J, Li W. In Situ Confinement of Ultrasmall Metal Nanoparticles in Short Mesochannels for Durable Electrocatalytic Nitrate Reduction with High Efficiency and Selectivity. *Adv. Mater.* **35**, 2207522 (2022).

6. Li R, Teng W, Shi Y, Li S, Fan J, Zhang W-x. High-performance electrocatalytic reduction of nitrate to dinitrogen (N2) with self-supporting iron nanoarrays. *Appl. Catal. B-Environ.* **373**, 125335 (2025).

7. Zhang F*, et al.* Interfacial Assembly of Nanocrystals on Nanofibers with Strong Interaction for Electrocatalytic Nitrate Reduction. *Angew. Chem., Int. Ed.* **62**, e202310383 (2023).

8. Luo H*, et al.* Modulating the Active Hydrogen Adsorption on Fe─N Interface for Boosted Electrocatalytic Nitrate Reduction with Ultra‐Long Stability. *Adv. Mater.* **35**, 202304695 (2023).

9. Wang K, Mao R, Liu R, Zhang J, Zhao X. Sulfur-dopant-promoted electrocatalytic reduction of nitrate by a self-supported iron cathode: Selectivity, stability, and underlying mechanism. *Appl. Catal. B-Environ.* **319**, 121862 (2022).

10. Gao J*, et al.* Non-precious Co3O4-TiO2/Ti cathode based electrocatalytic nitrate reduction: Preparation, performance and mechanism. *Appl. Catal. B-Environ.* **254**, 391-402 (2019).

11. Wang J, Ling L, Deng Z, Zhang W-x. Nitrogen-doped iron for selective catalytic reduction of nitrate to dinitrogen. *Science Bulletin* **65**, 926-933 (2020).

12. Zhou J*, et al.* Achieving efficient and stable electrochemical nitrate removal by in-situ reconstruction of Cu2O/Cu electroactive nanocatalysts on Cu foam. *Appl. Catal. B-Environ.* **317**, 121811 (2022).

13. Xie F*, et al.* Built–in Electric Field Boosted Tandem Catalysis for Rapid Electrochemical Nitrate Reduction to Nitrogen. *ACS Nano* **19**, 26217-26228 (2025).
